# Supplementary material for: Geographical and spatial variations in bowel cancer screening participation, Australia, 2015–2020
Source: PLoS One. 2023 Jul 20;18(7):e0288992. doi: 10.1371/journal.pone.0288992 (PMC10358922; doi:10.1371/journal.pone.0288992)
Supplement: S1 Dataset — (XLSX) [file pone.0288992.s003.xlsx]

## Sheet: Notes
Notes
SA2 refers to 2016 statistical area level 2 ( SA2) of residence.
SA2 are part of the Australian Bureau of Statistics Australian Statistical Geography Standard (ASGS).
SPR calculated using Bayesian spatial models and is the ratio of the observed number of screens to the expected number of screens, considering age structure and eligible populaton size.
Count is the smoothed count of screens from Bayesian spatial models
Counts of less than 3 have been clipped at 3 for confidentiality (as per standard reporting guidelines).
PP is the posterior probability that the smoothed SPR was greater than one from the Bayesian spatial models
Each 2-year period covers from 1 January in the first year to 31 December in the following year. For example, 2017–2018 covers 1 January 2017 to 31 December 2018 inclusive.
Data only shown for 2247 SA2s in Australia that were included in the Bayesian spatial analysis. . SA2's with zero populations or populations less than 5 on average were not included.
Source: Australian Institute of Health and Welfare. Cancer screening programs: quarterly data Canberra: AIHW; 2022 [26 October 2022]. Available from: https://www.aihw.gov.au/reports/cancer-screening/national-cancer-screening-programs-participation/data..

## Sheet: 2019-20
SA2	SA2name	Count	SPR	PP	period
11007	Braidwood	581.25	0.994783	0.446027	2019-20
11008	Karabar	735.959	0.864741	1.33333e-05	2019-20
11009	Queanbeyan	833.376	0.874437	2.66667e-05	2019-20
11010	Queanbeyan - East	379.55	0.917488	0.02924	2019-20
11011	Queanbeyan Region	2568.98	1.09889	1	2019-20
11012	Queanbeyan West - Jerrabomberra	1303.31	1.08601	0.998747	2019-20
11013	Bombala	364.654	1.07217	0.929167	2019-20
11014	Cooma	932.225	1.00655	0.581233	2019-20
11015	Cooma Region	374.97	0.992992	0.436047	2019-20
11016	Jindabyne - Berridale	811.513	1.04203	0.886433	2019-20
11017	Batemans Bay	1454.91	1.0085	0.627887	2019-20
11018	Batemans Bay - South	1130.42	1.02598	0.80938	2019-20
11019	Bega - Tathra	1804.37	1.13015	0.999993	2019-20
11020	Bega-Eden Hinterland	1108.07	1.07377	0.993007	2019-20
11021	Broulee - Tomakin	889.086	1.11222	0.9993	2019-20
11022	Deua - Wadbilliga	3	1.02397	0.598527	2019-20
11023	Eden	607.231	1.07019	0.955787	2019-20
11024	Eurobodalla Hinterland	493.004	1.05494	0.913273	2019-20
11025	Merimbula - Tura Beach	2094.88	1.17278	1	2019-20
11026	Moruya - Tuross Head	1159.66	1.04756	0.945373	2019-20
11027	Narooma - Bermagui	1811.78	1.08395	0.9998	2019-20
11028	Avoca Beach - Copacabana	839.155	0.993926	0.420753	2019-20
11029	Box Head - MacMasters Beach	1358.16	0.968223	0.178153	2019-20
11030	Calga - Kulnura	482.176	0.977515	0.230913	2019-20
11031	Erina - Green Point	1670.13	0.994172	0.430367	2019-20
11032	Gosford - Springfield	2056.92	1.00005	0.500607	2019-20
11033	Kariong	566.418	1.04307	0.967893	2019-20
11034	Kincumber - Picketts Valley	1021.22	0.942281	0.000493333	2019-20
11035	Narara	736.859	1.04929	0.950607	2019-20
11036	Niagara Park - Lisarow	831.209	0.923712	0.000553333	2019-20
11037	Point Clare - Koolewong	726.243	0.888852	2.66667e-05	2019-20
11038	Saratoga - Davistown	784.006	0.95269	0.0107133	2019-20
11039	Terrigal - North Avoca	1892.13	0.843755	0	2019-20
11040	Umina - Booker Bay - Patonga	3006.3	0.934327	0.0100533	2019-20
11041	Wamberal - Forresters Beach	1127.4	0.969462	0.100827	2019-20
11042	Woy Woy - Blackwall	1555.26	0.866035	0	2019-20
11043	Wyoming	1040.29	1.01557	0.632147	2019-20
11044	Bateau Bay - Killarney Vale	2212.07	0.992145	0.382913	2019-20
11045	Blue Haven - San Remo	900.589	0.988715	0.381173	2019-20
11046	Budgewoi - Buff Point - Halekulani	1086.8	0.988149	0.367893	2019-20
11047	Chittaway Bay - Tumbi Umbi	1614.92	0.926256	0.00016	2019-20
11048	Gorokan - Kanwal - Charmhaven	2093.26	0.910377	0.0004	2019-20
11049	Jilliby - Yarramalong	394.742	0.91541	0.0038	2019-20
11050	Lake Munmorah - Mannering Park	1390.37	0.920196	0.00094	2019-20
11051	Ourimbah - Fountaindale	590.951	0.842561	0	2019-20
11052	Summerland Point - Gwandalan	745.695	0.966178	0.03872	2019-20
11053	The Entrance	2029.96	1.0291	0.8245	2019-20
11054	Toukley - Norah Head	1181.13	1.01019	0.617853	2019-20
11055	Tuggerah - Kangy Angy	760.886	0.908891	0.00697333	2019-20
11056	Warnervale - Wadalba	1289.79	0.801258	0	2019-20
11057	Wyong	838.038	0.914659	0.000886667	2019-20
11058	Bathurst	2623.69	0.952288	0.0953667	2019-20
11059	Bathurst - East	1022.46	0.938914	0.0162533	2019-20
11060	Bathurst Region	865.563	0.973791	0.247273	2019-20
11061	Oberon	568.943	0.940345	0.0178067	2019-20
11062	Condobolin	593.179	0.863849	0.000486667	2019-20
11063	Cowra	1103	0.857905	0.000106667	2019-20
11064	Cowra Region	669.916	0.890983	0	2019-20
11065	Forbes	1095.65	0.991797	0.388553	2019-20
11066	Grenfell	468.798	0.975128	0.17762	2019-20
11067	Parkes (NSW)	1050.49	0.9789	0.307013	2019-20
11068	Parkes Region	382.676	0.921186	0.00156	2019-20
11069	West Wyalong	546.612	1.00104	0.513327	2019-20
11070	Lithgow	1351.17	0.954045	0.01074	2019-20
11071	Lithgow Region	1049.1	0.999771	0.49614	2019-20
11072	Mudgee	1260.68	1.0476	0.9484	2019-20
11073	Mudgee Region - East	506.922	0.974765	0.0999533	2019-20
11074	Mudgee Region - West	1139.68	0.947398	0.0069	2019-20
11076	Blayney	916.043	1.0512	0.995073	2019-20
11077	Orange	2358.63	0.999752	0.496853	2019-20
11078	Orange - North	1691.31	1.00836	0.64038	2019-20
11079	Orange Region	1223.67	0.97091	0.0857	2019-20
11080	Grafton	2395.59	0.961444	0.212953	2019-20
11081	Grafton Region	1922.72	0.88857	0.00277333	2019-20
11082	Maclean - Yamba - Iluka	2724.81	1.122	0.999987	2019-20
11083	Bellingen	858.175	1.05103	0.99484	2019-20
11084	Coffs Harbour - North	1858.88	1.00517	0.55694	2019-20
11085	Coffs Harbour - South	1965.66	1.00016	0.502793	2019-20
11086	Coramba - Nana Glen - Bucca	384.308	0.681371	0	2019-20
11087	Dorrigo	380.946	0.780498	0	2019-20
11088	Korora - Emerald Beach	1178.44	0.740333	0	2019-20
11089	Sawtell - Boambee	2578.94	0.795822	0	2019-20
11090	Urunga	699.779	0.589857	0	2019-20
11091	Woolgoolga - Arrawarra	1688.65	0.821016	0	2019-20
11092	Bourke - Brewarrina	238.68	0.725137	0	2019-20
11093	Cobar	319.891	0.863016	0	2019-20
11094	Coonamble	309.069	0.820247	0	2019-20
11095	Nyngan - Warren	410.993	0.884459	0	2019-20
11096	Walgett - Lightning Ridge	437.914	0.853738	0	2019-20
11097	Broken Hill	1588.89	0.926706	0.0421667	2019-20
11098	Far West	169	0.918688	0.0158933	2019-20
11099	Coonabarabran	884.121	0.831277	0	2019-20
11100	Dubbo - East	751.04	0.780865	0	2019-20
11101	Dubbo - South	1846.03	1.01619	0.70702	2019-20
11102	Dubbo - West	607.512	0.875986	0	2019-20
11103	Dubbo Region	480.642	0.956227	0.0702667	2019-20
11104	Gilgandra	482.367	1.00143	0.519667	2019-20
11105	Narromine	597.707	0.919545	0.000193333	2019-20
11106	Wellington	760.766	0.97704	0.173867	2019-20
11107	Branxton - Greta - Pokolbin	1092.73	0.963937	0.17628	2019-20
11108	Cessnock	1931.89	0.962555	0.148073	2019-20
11109	Cessnock Region	896.816	1.00665	0.642773	2019-20
11110	Dungog	1134.26	1.12311	0.999827	2019-20
11111	Kurri Kurri - Abermain	1738.94	0.956304	0.01832	2019-20
11112	Singleton	1562.55	1.05669	0.97264	2019-20
11113	Singleton Region	534.5	1.08719	0.9962	2019-20
11114	Maitland	684.43	1.02024	0.742507	2019-20
11115	Maitland - East	2899.73	1.10939	1	2019-20
11116	Maitland - North	869.428	0.885565	6.66667e-06	2019-20
11117	Maitland - West	2105.45	1.1507	0.999967	2019-20
11118	Thornton - Millers Forest	1181.18	1.14808	1	2019-20
11119	Anna Bay	882.199	1.0219	0.808513	2019-20
11120	Lemon Tree Passage - Tanilba Bay	969.02	0.878452	0	2019-20
11121	Nelson Bay Peninsula	3338.95	0.908367	0.02786	2019-20
11122	Raymond Terrace	1284.39	0.939829	0.05096	2019-20
11123	Seaham - Woodville	745.33	0.913589	0.00238	2019-20
11124	Tea Gardens - Hawks Nest	1311.08	0.962945	0.02954	2019-20
11125	Williamtown - Medowie - Karuah	1599.52	1.0506	0.948047	2019-20
11126	Muswellbrook	1069.55	1.00168	0.5041	2019-20
11127	Muswellbrook Region	344.376	1.0367	0.936353	2019-20
11128	Scone	601.461	0.924667	0.358387	2019-20
11129	Scone Region	826.839	1.02019	0.7965	2019-20
11131	Dapto - Avondale	2435.42	0.921458	0.01014	2019-20
11132	Horsley - Kembla Grange	936.205	1.13698	1	2019-20
11133	Port Kembla Industrial	3	1.10498	0.998187	2019-20
11134	Unanderra - Mount Kembla	1764.56	1.14166	1	2019-20
11135	Illawarra Catchment Reserve	3	0.980686	0.167607	2019-20
11136	Albion Park - Macquarie Pass	1549.15	0.951444	0.01726	2019-20
11137	Albion Park Rail	700.337	1.00955	0.66504	2019-20
11138	Kiama	1372.22	1.11156	0.99962	2019-20
11139	Kiama Downs - Minnamurra	794.473	1.14473	1	2019-20
11140	Kiama Hinterland - Gerringong	1055.56	1.1189	1	2019-20
11141	Shellharbour - Flinders	2070.48	0.996999	0.4653	2019-20
11142	Shellharbour - Oak Flats	1186.97	1.07472	0.999827	2019-20
11143	Warilla	2109.61	0.999368	0.49212	2019-20
11144	Balgownie - Fairy Meadow	2146.04	1.10892	0.999587	2019-20
11145	Corrimal - Tarrawanna - Bellambi	1662.63	0.815891	0	2019-20
11146	Figtree - Keiraville	1980	0.892811	2.66667e-05	2019-20
11147	Helensburgh	1002.18	0.956632	0.10116	2019-20
11148	Thirroul - Austinmer - Coalcliff	1657.9	0.94948	0.0433867	2019-20
11150	Woonona - Bulli - Russell Vale	2396.93	1.00261	0.537047	2019-20
11151	Bulahdelah - Stroud	696.19	1.01842	0.873147	2019-20
11152	Forster	2531.74	0.944986	0.00605333	2019-20
11153	Forster-Tuncurry Region	995.122	0.927681	0.01908	2019-20
11154	Tuncurry	1000.39	0.975973	0.17804	2019-20
11155	Kempsey	1625.66	1.07994	0.986407	2019-20
11156	Kempsey Region	1182.28	1.11952	1	2019-20
11157	Macksville - Scotts Head	729.615	0.958934	0.0141667	2019-20
11158	Nambucca Heads	1009.59	1.06198	0.997867	2019-20
11159	Nambucca Heads Region	1152.45	0.97931	0.28094	2019-20
11160	South West Rocks	962.257	1.17742	1	2019-20
11162	Laurieton - Bonny Hills	2877.38	1.04261	0.91212	2019-20
11163	Port Macquarie - East	3860.46	1.10834	0.999933	2019-20
11164	Port Macquarie - West	1890.95	1.10067	0.999887	2019-20
11165	Port Macquarie Region	650.606	0.95804	0.0369133	2019-20
11166	Wauchope	1410.03	0.909233	0.0275467	2019-20
11167	Gloucester	829.238	1.01743	0.686127	2019-20
11168	Old Bar - Manning Point - Red Head	1825.49	1.0092	0.57016	2019-20
11169	Taree	2640.02	1.06078	0.960313	2019-20
11170	Taree Region	2266.14	1.04462	0.921953	2019-20
11171	Wingham	653.357	0.980936	0.272173	2019-20
11172	Albury - East	1938.8	1.02581	0.764373	2019-20
11173	Albury - North	1001.88	1.17273	1	2019-20
11174	Albury - South	1211.86	0.984292	0.290433	2019-20
11175	Albury Region	1500.46	1.01636	0.799007	2019-20
11176	Lavington	1608.48	1.00494	0.55106	2019-20
11177	Hay	320.517	1.03003	0.80738	2019-20
11178	Wentworth - Buronga	700.155	1.04531	0.845887	2019-20
11179	Wentworth-Balranald Region	320.691	0.936151	0.00824	2019-20
11180	Corowa	840.932	0.935931	0.0074	2019-20
11181	Corowa Region	910.841	0.961594	0.142847	2019-20
11182	Deniliquin	949.298	0.884216	0.000793333	2019-20
11183	Deniliquin Region	701.758	0.860651	0	2019-20
11184	Moama	953.367	0.745613	0	2019-20
11185	Tocumwal - Finley - Jerilderie	1120.79	0.76348	0	2019-20
11186	Armidale	2503.99	0.842275	0	2019-20
11187	Armidale Region - North	625.017	0.759524	0	2019-20
11188	Armidale Region - South	804.173	0.839959	0	2019-20
11189	Walcha	438.502	0.914841	0.01812	2019-20
11190	Glen Innes	1126.65	0.913536	0.0022	2019-20
11191	Inverell	1292.02	0.946155	0.00802667	2019-20
11192	Inverell Region - East	564.751	0.961994	0.0429867	2019-20
11193	Inverell Region - West	625.46	0.778897	0	2019-20
11194	Tenterfield	783.234	0.966508	0.0519667	2019-20
11195	Moree	638.876	1.10857	1	2019-20
11196	Moree Region	339.039	1.0226	0.745833	2019-20
11197	Narrabri	659.88	1.05847	0.998467	2019-20
11198	Narrabri Region	367.491	1.01495	0.7734	2019-20
11199	Gunnedah	789.908	0.848974	0	2019-20
11200	Gunnedah Region	391.111	1.13247	0.998507	2019-20
11201	Quirindi	881.881	1.12263	1	2019-20
11202	Tamworth - East	1813.39	1.2302	1	2019-20
11203	Tamworth - North	1777	1.10674	0.999993	2019-20
11204	Tamworth - West	346.654	0.95553	0.0657933	2019-20
11205	Tamworth Region	2098.04	1.03667	0.901527	2019-20
11206	Belmont - Bennetts Green	2433.06	1.0202	0.777807	2019-20
11207	Belmont South - Blacksmiths	748.934	0.962329	0.0481667	2019-20
11208	Charlestown - Dudley	2703.85	1.09473	0.99998	2019-20
11209	Glendale - Cardiff - Hillsborough	2428.46	1.09079	0.999647	2019-20
11210	Mount Hutton - Windale	805.066	1.01582	0.68186	2019-20
11211	Redhead	490.598	1.058	0.98866	2019-20
11212	Swansea - Caves Beach	1793.94	0.86034	1.33333e-05	2019-20
11213	Valentine - Eleebana	1823.55	0.994324	0.41602	2019-20
11214	Warners Bay - Boolaroo	1925.65	1.08949	0.999913	2019-20
11215	Bolton Point - Teralba	1017.55	1.00295	0.544427	2019-20
11216	Bonnells Bay - Silverwater	1108.12	0.921885	0.00106	2019-20
11217	Edgeworth - Cameron Park	1379.97	1.17613	1	2019-20
11218	Morisset - Cooranbong	1840.8	1.07194	0.99634	2019-20
11219	Toronto - Awaba	2048.44	0.987264	0.455253	2019-20
11220	Wangi Wangi - Rathmines	1394.98	0.891109	0.00106667	2019-20
11221	West Wallsend - Barnsley - Killingworth	819.399	1.10784	0.99986	2019-20
11222	Adamstown - Kotara	1624.41	1.01596	0.764813	2019-20
11223	Beresfield - Hexham	781.052	0.956991	0.0694867	2019-20
11224	Hamilton - Broadmeadow	1327.27	1.00342	0.54278	2019-20
11225	Lambton - New Lambton	2016.92	1.03297	0.958113	2019-20
11226	Maryland - Fletcher - Minmi	1355.18	1.05286	0.99248	2019-20
11227	Mayfield - Warabrook	1372.39	0.943012	0.0444467	2019-20
11228	Merewether - The Junction	1883.66	0.930656	0.00582	2019-20
11229	Newcastle - Cooks Hill	1393.34	0.883237	6.66667e-06	2019-20
11230	Newcastle Port - Kooragang	3	0.928026	0.02528	2019-20
11231	Shortland - Jesmond	662.014	1.08862	0.997287	2019-20
11232	Stockton - Fullerton Cove	1226.36	0.811378	0	2019-20
11233	Wallsend - Elermore Vale	2036.76	0.887982	2e-05	2019-20
11234	Waratah - North Lambton	1026.69	0.92255	0.00566	2019-20
11235	Wickham - Carrington - Tighes Hill	859.353	0.970469	0.132473	2019-20
11236	Ballina	2766.71	0.911314	0.00117333	2019-20
11237	Ballina Region	2151.35	0.866485	0	2019-20
11238	Bangalow	719.367	0.95387	0.01874	2019-20
11239	Brunswick Heads - Ocean Shores	1127.87	0.986534	0.283247	2019-20
11240	Byron Bay	1268.82	0.84868	0	2019-20
11241	Evans Head	613.423	0.929798	0.00595333	2019-20
11242	Lennox Head - Skennars Head	990.121	1.01281	0.69916	2019-20
11243	Mullumbimby	1023.09	0.926325	6.66667e-05	2019-20
11244	Casino	1296.54	0.863973	0	2019-20
11245	Casino Region	877.805	0.834132	0	2019-20
11246	Goonellabah	1297.13	0.833694	0	2019-20
11247	Kyogle	990.783	0.890115	0.000393333	2019-20
11248	Lismore	2084.86	0.976293	0.306633	2019-20
11249	Lismore Region	1852.41	1.00191	0.524333	2019-20
11250	Kingscliff - Fingal Head	1701.05	0.978802	0.30308	2019-20
11251	Murwillumbah	1245.59	1.01728	0.707467	2019-20
11252	Murwillumbah Region	1068.57	0.912667	0.0155267	2019-20
11253	Pottsville	1592.43	0.922622	0.0194667	2019-20
11254	Tweed Heads	2323.41	1.02885	0.8103	2019-20
11256	Griffith (NSW)	1912.34	0.928949	0.00198	2019-20
11257	Griffith Region	760.323	0.954986	0.03824	2019-20
11258	Leeton	901.047	1.08519	0.99854	2019-20
11259	Narrandera	688.836	1.05447	0.920527	2019-20
11260	Tumbarumba	402.246	1.04572	0.897747	2019-20
11261	Tumut	852.11	1.023	0.541567	2019-20
11262	Tumut Region	504.082	1.1504	1	2019-20
11263	Cootamundra	1008.73	1.0257	0.865093	2019-20
11264	Gundagai	346.358	0.913451	0	2019-20
11265	Junee	575.848	0.97863	0.173787	2019-20
11266	Temora	863.63	1.02381	0.75108	2019-20
11267	Wagga Wagga - East	1541.49	1.10669	0.9912	2019-20
11268	Wagga Wagga - North	292.037	1.10279	1	2019-20
11269	Wagga Wagga - South	1766.29	1.07007	0.990833	2019-20
11270	Wagga Wagga - West	1489.2	1.03258	0.926247	2019-20
11271	Wagga Wagga Region	1287.16	0.951463	0.08108	2019-20
11272	Berry - Kangaroo Valley	1336.43	1.02917	0.861447	2019-20
11273	Callala Bay - Currarong	587.298	0.993968	0.407253	2019-20
11274	Culburra Beach	705.549	0.989841	0.410807	2019-20
11275	Ettrema - Sassafras - Budawang	3	1.07982	0.991087	2019-20
11276	Huskisson - Vincentia	1161.93	0.981539	0.18038	2019-20
11277	North Nowra - Bomaderry	1834.51	1.04646	0.990487	2019-20
11278	Nowra	2138.32	1.0814	0.988547	2019-20
11279	St Georges Basin - Erowal Bay	1813.6	0.993554	0.389327	2019-20
11280	Sussex Inlet - Berrara	731.574	0.963093	0.0297267	2019-20
11281	Tomerong - Wandandian - Woollamia	490.823	1.0165	0.677893	2019-20
11282	Ulladulla	2383.6	0.922602	0.05452	2019-20
11283	Ulladulla Region	1192.3	1.03733	0.96572	2019-20
11284	Bowral	1982.23	0.981011	0.234973	2019-20
11285	Hill Top - Colo Vale	564.644	0.96535	0.0458933	2019-20
11286	Mittagong	1330.85	0.772717	0	2019-20
11287	Moss Vale - Berrima	1428.16	0.799648	0	2019-20
11288	Robertson - Fitzroy Falls	402.19	0.848968	0	2019-20
11289	Southern Highlands	850.726	0.856758	0	2019-20
11290	Baulkham Hills (East)	2321.15	0.879013	0	2019-20
11291	Baulkham Hills (West) - Bella Vista	2679.2	0.928333	0.00174667	2019-20
11294	Glenhaven	805.765	0.904002	6.66667e-06	2019-20
11296	West Pennant Hills	1853.97	0.887146	0	2019-20
11297	Dural - Kenthurst - Wisemans Ferry	2418.37	0.869616	0.0215733	2019-20
11298	Galston - Laughtondale	629.554	0.904947	0.000493333	2019-20
11299	Bilpin - Colo - St Albans	364.905	0.813643	0	2019-20
11300	Kurrajong Heights - Ebenezer	2425.76	0.830663	0	2019-20
11301	Pitt Town - McGraths Hill	1355.29	0.835234	0.04356	2019-20
11302	Rouse Hill - Beaumont Hills	2207.76	0.91664	0.110687	2019-20
11303	Blacktown (East) - Kings Park	1049.49	0.895429	0	2019-20
11304	Blacktown (North) - Marayong	1390.11	0.889154	0	2019-20
11306	Doonside - Woodcroft	1999.06	0.904845	0.00188667	2019-20
11307	Lalor Park - Kings Langley	2238.36	0.854792	0	2019-20
11308	Seven Hills - Toongabbie	2218.9	1.01094	0.66186	2019-20
11309	Glenwood	1388.05	0.80828	0	2019-20
11310	Parklea - Kellyville Ridge	2086.32	0.890263	6.66667e-06	2019-20
11312	Riverstone - Marsden Park	1879.89	0.797879	0	2019-20
11313	Bidwill - Hebersham - Emerton	1163.54	0.787279	0	2019-20
11314	Glendenning - Dean Park	523.566	0.829574	0	2019-20
11315	Hassall Grove - Plumpton	1590.78	0.736591	0	2019-20
11316	Lethbridge Park - Tregear	1040.29	0.835745	0	2019-20
11317	Mount Druitt - Whalan	1435.02	0.785984	0	2019-20
11318	Prospect Reservoir	3	0.766927	0	2019-20
11319	Rooty Hill - Minchinbury	1772.72	0.848348	0	2019-20
11320	Banksmeadow	3	0.790717	0	2019-20
11321	Botany	985.538	0.801006	0	2019-20
11322	Mascot - Eastlakes	1670.95	0.891414	0	2019-20
11323	Pagewood - Hillsdale - Daceyville	1037.94	0.931546	0.000206667	2019-20
11324	Port Botany Industrial	3	0.84493	0	2019-20
11325	Sydney Airport	89.7438	0.885579	0.0481133	2019-20
11326	Marrickville	2405.28	0.795925	0	2019-20
11327	Petersham - Stanmore	1592.96	0.686661	0	2019-20
11328	Sydenham - Tempe - St Peters	708.387	0.945087	0.00664667	2019-20
11329	Darlinghurst	991.346	0.991748	0.331907	2019-20
11330	Erskineville - Alexandria	1355.38	0.931365	0.00139333	2019-20
11331	Glebe - Forest Lodge	1621.21	0.888661	0	2019-20
11332	Newtown - Camperdown - Darlington	1820.35	0.766576	0	2019-20
11333	Potts Point - Woolloomooloo	1722.01	0.7894	0	2019-20
11334	Pyrmont - Ultimo	1474.9	0.930929	9.33333e-05	2019-20
11335	Redfern - Chippendale	1268.8	0.759515	0	2019-20
11336	Surry Hills	1248.3	0.835314	0	2019-20
11337	Sydney - Haymarket - The Rocks	1874.55	0.850918	0	2019-20
11338	Waterloo - Beaconsfield	1736.9	0.987548	0.261813	2019-20
11339	Bondi - Tamarama - Bronte	1526.36	0.907019	4.66667e-05	2019-20
11340	Bondi Beach - North Bondi	1137.73	1.02934	0.86536	2019-20
11341	Bondi Junction - Waverly	1473.76	0.984345	0.237087	2019-20
11343	Double Bay - Bellevue Hill	2143.69	0.828042	0	2019-20
11344	Dover Heights	810.496	0.908543	0	2019-20
11345	Paddington - Moore Park	1396.06	0.821349	0	2019-20
11346	Rose Bay - Vaucluse - Watsons Bay	1025.78	0.878849	0	2019-20
11347	Woollahra	707.313	0.905193	0.000153333	2019-20
11348	Coogee - Clovelly	2153.24	0.892036	7.33333e-05	2019-20
11350	Malabar - La Perouse - Chifley	2362.12	0.903162	0	2019-20
11354	Bass Hill - Georges Hall	1900.76	0.95775	0.02704	2019-20
11355	Chullora	90.0747	0.973186	0.07836	2019-20
11356	Condell Park	896.414	0.996276	0.438373	2019-20
11357	Greenacre - Mount Lewis	1787.22	0.858775	0	2019-20
11358	Padstow	1793.74	0.866506	0	2019-20
11359	Panania - Milperra - Picnic Point	2711.23	0.962995	0.0917	2019-20
11360	Revesby	1593.02	0.91462	4.66667e-05	2019-20
11361	Yagoona - Birrong	1894	0.948687	0.0125867	2019-20
11362	Belmore - Belfield	1614.19	0.842643	0	2019-20
11363	Canterbury (South) - Campsie	2400.55	0.95972	0.0355333	2019-20
11364	Kingsgrove (North) - Earlwood	2588.89	1.03318	0.965093	2019-20
11366	Punchbowl	1575.51	1.006	0.583373	2019-20
11367	Roselands	1182.3	1.07398	0.999987	2019-20
11368	Hurstville	2040.64	1.06198	0.997333	2019-20
11369	Mortdale - Penshurst	2507.97	1.00727	0.648087	2019-20
11370	Narwee - Beverly Hills	1425.68	1.03713	0.975207	2019-20
11371	Oatley - Hurstville Grove	1414.29	1.02204	0.83236	2019-20
11372	Peakhurst - Lugarno	1975.66	0.996464	0.429593	2019-20
11373	Riverwood	1145.42	1.07726	0.99982	2019-20
11374	South Hurstville - Blakehurst	2345.59	1.06213	0.99786	2019-20
11375	Arncliffe - Bardwell Valley	1383.95	0.993169	0.37104	2019-20
11376	Bexley	2324.19	1.00694	0.61848	2019-20
11377	Kingsgrove (South) - Bardwell Park	1263.98	0.986723	0.211093	2019-20
11378	Kogarah	978.505	0.887403	0	2019-20
11379	Kogarah Bay - Carlton - Allawah	1471.18	0.92854	0.00170667	2019-20
11380	Monterey - Brighton-le-Sands - Kyeemagh	1385.75	1.13101	1	2019-20
11381	Rockdale - Banksia	1288.17	1.04737	0.9897	2019-20
11382	Sans Souci - Ramsgate	1686.37	1.07611	0.99942	2019-20
11383	Concord - Mortlake - Cabarita	2623.39	1.05787	0.984487	2019-20
11384	Concord West - North Strathfield	1587.56	1.08187	0.999787	2019-20
11385	Drummoyne - Rodd Point	1879.39	1.07724	0.999987	2019-20
11386	Five Dock - Abbotsford	2165.97	1.01852	0.76876	2019-20
11387	Balmain	1849.48	1.11699	0.999613	2019-20
11388	Leichhardt - Annandale	2569.61	0.986736	0.249847	2019-20
11389	Lilyfield - Rozelle	1581.96	1.10753	0.999953	2019-20
11390	Ashfield	1927.79	1.11225	1	2019-20
11391	Burwood - Croydon	2083.28	1.08487	0.999967	2019-20
11392	Canterbury (North) - Ashbury	1136.87	1.0934	0.999953	2019-20
11393	Croydon Park - Enfield	1759.17	1.0951	1	2019-20
11394	Dulwich Hill - Lewisham	1670.1	0.984517	0.35072	2019-20
11395	Haberfield - Summer Hill	1533.19	1.01409	0.69818	2019-20
11396	Homebush	868.653	0.982643	0.20598	2019-20
11398	Chatswood (East) - Artarmon	2429.05	0.8587	0	2019-20
11399	Chatswood (West) - Lane Cove North	1827.71	0.828962	0	2019-20
11400	Lane Cove - Greenwich	2972.8	0.867825	0	2019-20
11401	St Leonards - Naremburn	1065.9	0.880368	0	2019-20
11402	Willoughby - Castle Cove - Northbridge	3320.85	0.786845	0	2019-20
11403	Asquith - Mount Colah	2241.86	0.826023	0	2019-20
11404	Berowra - Brooklyn - Cowan	1559.35	0.888024	0	2019-20
11406	Normanhurst - Thornleigh - Westleigh	2065.61	0.913363	0.00766667	2019-20
11407	Gordon - Killara	2641.19	0.935628	0.0207267	2019-20
11408	Lindfield - Roseville	2834.12	1.13368	1	2019-20
11409	Pymble	1919.71	0.933322	0.2767	2019-20
11410	St Ives	2388.2	0.902326	0	2019-20
11411	Turramurra	2410.17	1.03076	0.88778	2019-20
11412	Wahroonga (East) - Warrawee	2236	1.05617	0.998073	2019-20
11413	Cremorne - Cammeray	2159.06	1.0155	0.686687	2019-20
11414	Crows Nest - Waverton	1795.88	0.918919	0.2052	2019-20
11415	Mosman	3468.37	0.888411	0	2019-20
11416	Neutral Bay - Kirribilli	1698.93	0.948376	0.00683333	2019-20
11417	North Sydney - Lavender Bay	1456.02	0.982367	0.253627	2019-20
11418	Balgowlah - Clontarf - Seaforth	2733.65	0.972368	0.11128	2019-20
11419	Manly - Fairlight	2483.18	0.929182	0.00138	2019-20
11420	Avalon - Palm Beach	1953.36	0.777945	0	2019-20
11421	Bayview - Elanora Heights	1430.28	1.03506	0.874413	2019-20
11422	Newport - Bilgola	2000.58	0.802419	0	2019-20
11423	Warriewood - Mona Vale	3101.29	1.05709	0.915647	2019-20
11424	Beacon Hill - Narraweena	1519.98	0.913945	0.00014	2019-20
11425	Cromer	921.135	0.824886	0	2019-20
11426	Dee Why - North Curl Curl	2488.91	0.981807	0.308533	2019-20
11427	Forestville - Killarney Heights	1571.95	1.00333	0.537113	2019-20
11428	Frenchs Forest - Belrose	3166.99	0.893871	0	2019-20
11429	Freshwater - Brookvale	2369.47	0.883121	0	2019-20
11430	Manly Vale - Allambie Heights	1870.42	0.917105	0.18018	2019-20
11431	Narrabeen - Collaroy	2966.46	0.940739	0.000366667	2019-20
11432	Terrey Hills - Duffys Forest	468.966	0.89028	0	2019-20
11433	Camden - Ellis Lane	1320.12	0.925839	0.000286667	2019-20
11434	Elderslie - Harrington Park	2069.91	0.88663	0	2019-20
11435	Mount Annan - Currans Hill	2329.84	0.819386	0	2019-20
11436	Bradbury - Wedderburn	1381.12	0.76865	0	2019-20
11437	Campbelltown - Woodbine	1710.19	0.981272	0.165567	2019-20
11438	Claymore - Eagle Vale - Raby	1657.67	0.727092	0	2019-20
11440	Ingleburn - Denham Court	1954.95	0.817312	0	2019-20
11441	Leumeah - Minto Heights	1568.59	0.799714	0	2019-20
11442	Macquarie Fields - Glenfield	1801.07	0.811954	0.0614667	2019-20
11443	Minto - St Andrews	1683.63	0.810847	0.0331533	2019-20
11444	Rosemeadow - Glen Alpine	2025.55	0.771393	0	2019-20
11445	Bargo	570.653	1.01514	0.680773	2019-20
11446	Douglas Park - Appin	1173.62	0.902893	4.66667e-05	2019-20
11447	Picton - Tahmoor - Buxton	1708.77	0.637586	0	2019-20
11448	The Oaks - Oakdale	905.626	0.930942	0.000353333	2019-20
11449	Blackheath - Megalong Valley	810.564	1.03823	0.90468	2019-20
11450	Blaxland - Warrimoo - Lapstone	2498.08	1.04276	0.991027	2019-20
11451	Blue Mountains - North	3	1.05557	0.997567	2019-20
11452	Katoomba - Leura	1777.05	1.01424	0.781413	2019-20
11453	Lawson - Hazelbrook - Linden	1498.55	1.03242	0.906607	2019-20
11454	Springwood - Winmalee	2768.51	1.02644	0.8201	2019-20
11455	Wentworth Falls	923.802	0.907233	4e-05	2019-20
11456	Blue Mountains - South	3	1.00762	0.622733	2019-20
11457	Cambridge Park	1398.12	0.963932	0.0571133	2019-20
11458	Castlereagh - Cranebrook	2090.16	0.714114	0	2019-20
11459	Emu Plains - Leonay	1362.88	0.842633	0	2019-20
11460	Glenmore Park - Regentville	1848.16	0.955587	0.0167867	2019-20
11461	Jamisontown - South Penrith	1569.25	0.962682	0.0440133	2019-20
11462	Kingswood - Werrington	1281.59	0.937275	0.000826667	2019-20
11463	Mulgoa - Luddenham - Orchard Hills	1082.21	0.957543	0.00779333	2019-20
11464	Penrith	1191.4	0.930879	0.00086	2019-20
11465	Warragamba - Silverdale	587.934	1.0142	0.759593	2019-20
11466	Richmond - Clarendon	1469.31	0.960911	0.07642	2019-20
11467	Windsor - Bligh Park	1216.33	0.834978	0	2019-20
11468	Yarramundi - Londonderry	660.586	0.888863	0	2019-20
11469	Erskine Park	705.345	0.887926	4.66667e-05	2019-20
11470	St Clair	1973.34	0.88408	0.00146	2019-20
11473	Homebush Bay - Silverwater	1198.99	0.925067	0.119233	2019-20
11475	Rookwood Cemetery	3	0.820023	0	2019-20
11476	Carlingford	2954.97	1.01288	0.685473	2019-20
11477	Ermington - Rydalmere	2049.03	1.03683	0.968747	2019-20
11478	Oatlands - Dundas Valley	1838.92	1.07852	0.999887	2019-20
11479	Chester Hill - Sefton	1667.38	0.977658	0.404987	2019-20
11480	Fairfield - East	1295.2	0.969088	0.0782267	2019-20
11481	Granville - Clyde	1422.23	0.967555	0.0410067	2019-20
11482	Greystanes - Pemulwuy	2562.52	0.968022	0.0809867	2019-20
11483	Guildford - South Granville	1379.91	1.00205	0.52472	2019-20
11484	Guildford West - Merrylands West	1483.15	1.04059	0.929613	2019-20
11485	Merrylands - Holroyd	2076.74	0.947603	0.0272933	2019-20
11486	Smithfield Industrial	3	0.912273	0.00228667	2019-20
11487	Yennora Industrial	3	0.814931	0	2019-20
11489	North Parramatta	1337.97	0.938743	0.257247	2019-20
11490	North Rocks	905.31	0.90065	0.163647	2019-20
11491	Northmead	1220.61	0.875127	0.0819667	2019-20
11492	Parramatta - Rosehill	1392.58	0.844801	0	2019-20
11493	Toongabbie - Constitution Hill	2001.68	0.884926	0.11058	2019-20
11494	Winston Hills	1152.57	0.869059	0.09484	2019-20
11495	Epping - North Epping	3201.52	0.982812	0.434673	2019-20
11496	Pennant Hills - Cheltenham	2672.51	1.06271	0.99456	2019-20
11497	Eastwood - Denistone	2977.57	0.953775	0.298833	2019-20
11498	Gladesville - Huntleys Point	1660.22	1.00693	0.570893	2019-20
11499	Hunters Hill - Woolwich	1126.33	1.01632	0.785507	2019-20
11500	Macquarie Park - Marsfield	1548.88	0.966228	0.344593	2019-20
11501	North Ryde - East Ryde	1456.36	0.95729	0.3233	2019-20
11503	West Ryde - Meadowbank	1772.27	0.801028	0	2019-20
11504	Ashcroft - Busby - Miller	1208.79	0.839768	0	2019-20
11505	Austral - Greendale	764.744	0.840606	0.0136467	2019-20
11506	Cobbitty - Leppington	2140.52	0.899841	0.000106667	2019-20
11509	Bonnyrigg Heights - Bonnyrigg	1900.86	0.796149	0.00404	2019-20
11510	Bossley Park - Abbotsbury	2218.83	0.705196	0	2019-20
11511	Cabramatta - Lansvale	2866.78	0.817713	0	2019-20
11512	Cabramatta West - Mount Pritchard	1752.25	0.812465	0.0143667	2019-20
11513	Canley Vale - Canley Heights	2458.36	0.840506	0.03228	2019-20
11514	Edensor Park	1214.13	0.9508	0.0391667	2019-20
11515	Fairfield	1952.84	0.838487	0.03854	2019-20
11516	Fairfield - West	2049.6	0.779741	0.01362	2019-20
11517	Greenfield Park - Prairiewood	967.884	0.689084	0	2019-20
11518	Horsley Park - Kemps Creek	485.61	0.720638	0	2019-20
11519	Smithfield - Wetherill Park	1852.43	0.796738	0.00723333	2019-20
11520	St Johns Park - Wakeley	1399.76	0.797906	0.01356	2019-20
11521	Wetherill Park Industrial	112.337	0.776045	0.00799333	2019-20
11522	Casula	1316.11	0.842309	0.0332067	2019-20
11523	Chipping Norton - Moorebank	1846.44	0.905056	0.00584	2019-20
11524	Holsworthy - Wattle Grove	1661.64	0.839537	0	2019-20
11529	Gymea - Grays Point	2003.21	0.933385	0.264833	2019-20
11530	Miranda - Yowie Bay	1815.86	0.936145	0.00635333	2019-20
11531	Sylvania - Taren Point	1697.03	0.935884	0.265933	2019-20
11533	Heathcote - Waterfall	669.777	0.915972	0.242393	2019-20
11534	Illawong - Alfords Point	1334.94	0.893642	6e-05	2019-20
11535	Menai - Lucas Heights - Woronora	2571	0.914939	0.181667	2019-20
11536	Oyster Bay - Como - Jannali	2464.76	1.00007	0.50124	2019-20
11537	Royal National Park	3	0.926757	0.215413	2019-20
11538	Sutherland - Kirrawee	1913.02	0.963936	0.361247	2019-20
11539	Goulburn	2672.1	1.06506	0.965813	2019-20
11540	Goulburn Region	1667.52	1.03338	0.901127	2019-20
11541	Yass	807.901	0.817284	0	2019-20
11542	Yass Region	1256.2	1.03259	0.918593	2019-20
11543	Young	1140.06	0.860981	0	2019-20
11544	Young Region	845.058	0.967258	0.185133	2019-20
11545	Berkeley - Lake Heights - Cringila	1210.19	1.10512	0.999993	2019-20
11546	Port Kembla - Warrawong	3	1.00273	0.538053	2019-20
11547	Windang - Primbee	3	0.889649	0	2019-20
11548	Wollongong - East	3	1.14099	0.999953	2019-20
11549	Wollongong - West	1148.93	1.07412	0.999933	2019-20
11550	Banora Point	3	1.03401	0.90732	2019-20
11551	Terranora - North Tumblegum	3	1.0801	0.9276	2019-20
11552	Tweed Heads South	1176.63	0.979896	0.195907	2019-20
11553	Castle Hill - Central	3	0.620766	0	2019-20
11554	Castle Hill - East	3	0.766835	0	2019-20
11555	Castle Hill - North	1679.08	0.811135	0	2019-20
11556	Castle Hill - South	3	0.61326	0	2019-20
11557	Castle Hill - West	607.537	0.686185	0	2019-20
11558	Cherrybrook	2393.38	0.879392	0.109213	2019-20
11559	Kellyville	3	0.814615	0	2019-20
11560	Blacktown (South)	3	0.838203	0	2019-20
11561	Blacktown (West)	1159.46	0.938042	0.00230667	2019-20
11562	Acacia Gardens	3	0.844826	0	2019-20
11563	Quakers Hill	1772.07	0.67463	0	2019-20
11564	Kensington (NSW)	811.533	0.815878	0	2019-20
11565	Kingsford	3	0.781945	0	2019-20
11566	Maroubra - North	1020.9	0.889684	0	2019-20
11567	Maroubra - South	3	0.986798	0.245887	2019-20
11568	Maroubra - West	3	0.897318	0	2019-20
11569	Randwick - North	1180.08	0.993161	0.382067	2019-20
11570	Randwick - South	3	0.977289	0.137187	2019-20
11571	Bankstown - North	1163.88	1.03013	0.883287	2019-20
11572	Bankstown - South	3	0.80995	0	2019-20
11573	Lakemba	3	1.04582	0.9833	2019-20
11574	Wiley Park	519.246	1.06315	0.99274	2019-20
11575	Strathfield	1837.64	0.977457	0.12654	2019-20
11576	Strathfield South	3	0.764434	0	2019-20
11577	Hornsby - East	3	1.09056	0.998893	2019-20
11578	Hornsby - West	1151.83	0.969678	0.09622	2019-20
11579	Waitara - Wahroonga (West)	3	0.999001	0.487887	2019-20
11580	Colyton - Oxley Park	3	0.858983	0	2019-20
11581	St Marys - North St Marys	1094.7	0.975516	0.163853	2019-20
11582	Auburn - Central	1074.18	0.914309	5.33333e-05	2019-20
11583	Auburn - North	3	0.95985	0.04252	2019-20
11584	Auburn - South	3	1.05185	0.988967	2019-20
11585	Berala	3	0.970741	0.0981067	2019-20
11586	Lidcombe	3	0.938482	0.00272667	2019-20
11587	Regents Park	490.971	1.04774	0.90072	2019-20
11588	Pendle Hill - Girraween	838.403	0.898822	7.33333e-05	2019-20
11589	Wentworthville - Westmead	3	0.888511	0.11382	2019-20
11590	Putney	3	0.917357	0.2949	2019-20
11591	Ryde	2502.39	0.92025	0.00014	2019-20
11592	Badgerys Creek	3	0.859245	0.17588	2019-20
11593	Cecil Hills	3	0.794337	0.0162333	2019-20
11594	Green Valley	1320.06	0.871366	0	2019-20
11595	Hinchinbrook	3	0.826998	0.01986	2019-20
11596	Hoxton Park - Carnes Hill - Horningsea Park	914.484	0.768613	0	2019-20
11597	West Hoxton - Middleton Grange	3	0.817688	0.0446667	2019-20
11598	Liverpool	2031.57	0.83191	0.0185	2019-20
11599	Lurnea - Cartwright	3	0.843533	0.0763733	2019-20
11600	Prestons - Edmondson Park	1432.75	0.931459	0.00014	2019-20
11601	Warwick Farm	3	0.824053	0.0533333	2019-20
11602	Caringbah	1192.25	0.855925	0	2019-20
11603	Caringbah South	3	0.834533	0.0803667	2019-20
11604	Cronulla - Kurnell - Bundeena	2806.99	0.741503	0	2019-20
11605	Lilli Pilli - Port Hacking - Dolans Bay	3	0.778165	0.150033	2019-20
11606	Woolaware - Burraneer	3	0.842145	0	2019-20
11607	Engadine	3	0.953841	0.343687	2019-20
11608	Loftus - Yarrawarrah	890.922	1.16253	1	2019-20
11609	Woronora Heights	3	0.968385	0.400387	2019-20
21001	Alfredton	1860.54	1.24331	1	2019-20
21002	Ballarat	1933.75	1.25053	1	2019-20
21003	Ballarat - North	2788.86	1.1614	1	2019-20
21004	Ballarat - South	2579.38	1.06866	0.999627	2019-20
21005	Buninyong	1113.41	1.25949	1	2019-20
21006	Delacombe	936.682	1.12556	0.999893	2019-20
21007	Smythes Creek	568.941	1.16595	0.999953	2019-20
21008	Wendouree - Miners Rest	1635.9	1.05689	0.988273	2019-20
21009	Bacchus Marsh Region	902.579	1.0949	0.9985	2019-20
21010	Creswick - Clunes	1194.17	1.10298	0.99974	2019-20
21011	Daylesford	1455.3	1.06461	0.99294	2019-20
21012	Gordon (Vic.)	753.703	1.12285	0.999687	2019-20
21013	Avoca	533.412	1.03607	0.814333	2019-20
21014	Beaufort	636.174	1.06238	0.950327	2019-20
21015	Golden Plains - North	656.822	1.10155	0.99584	2019-20
21016	Maryborough (Vic.)	1091.32	0.99414	0.421853	2019-20
21017	Maryborough Region	851.691	1.03764	0.873407	2019-20
21018	Bendigo	2072.72	1.07863	0.999767	2019-20
21019	California Gully - Eaglehawk	1450	1.02781	0.856827	2019-20
21020	East Bendigo - Kennington	1772.08	1.21254	1	2019-20
21021	Flora Hill - Spring Gully	1024.61	1.2102	1	2019-20
21022	Kangaroo Flat - Golden Square	2510.43	1.11172	1	2019-20
21023	Maiden Gully	588.917	1.25368	1	2019-20
21024	Strathfieldsaye	1096.71	1.30131	1	2019-20
21025	White Hills - Ascot	2002.01	1.1866	1	2019-20
21026	Bendigo Region - South	715.237	1.23369	1	2019-20
21027	Castlemaine	1922.82	1.18402	1	2019-20
21028	Castlemaine Region	1381.24	1.13329	1	2019-20
21029	Heathcote	643.291	0.951466	0.0849467	2019-20
21030	Kyneton	1384.18	1.08402	0.998773	2019-20
21031	Woodend	1155.95	1.19461	1	2019-20
21032	Bendigo Region - North	484.859	1.04231	0.85928	2019-20
21033	Loddon	979.55	1.00688	0.590727	2019-20
21034	Bannockburn	762.364	1.19326	1	2019-20
21035	Golden Plains - South	936.086	1.10515	0.999507	2019-20
21036	Winchelsea	848.732	1.13789	0.999933	2019-20
21037	Belmont	1440.07	1.07907	0.99816	2019-20
21038	Corio - Norlane	2577.34	0.892369	0	2019-20
21039	Geelong	1966.02	1.09086	0.999953	2019-20
21040	Geelong West - Hamlyn Heights	2285.77	1.15241	1	2019-20
21041	Grovedale	2734.67	1.17545	1	2019-20
21042	Highton	3186.32	1.26316	1	2019-20
21043	Lara	2237.75	1.15055	1	2019-20
21044	Leopold	1562.83	1.15666	1	2019-20
21045	Newcomb - Moolap	1907.09	1.03227	0.91946	2019-20
21046	Newtown (Vic.)	1204.62	1.18776	1	2019-20
21047	North Geelong - Bell Park	1757.57	1.01967	0.795833	2019-20
21048	Clifton Springs	2273.61	1.20324	1	2019-20
21049	Lorne - Anglesea	939.422	1.22567	1	2019-20
21050	Ocean Grove - Barwon Heads	3695.19	1.27613	1	2019-20
21051	Portarlington	1679.33	1.20135	1	2019-20
21052	Point Lonsdale - Queenscliff	926.405	1.27425	1	2019-20
21053	Torquay	2865.43	1.2815	1	2019-20
21054	Alexandra	1126.03	1.12052	0.99996	2019-20
21055	Euroa	1030.89	1.05567	0.966927	2019-20
21056	Kilmore - Broadford	1806.15	1.0776	0.999193	2019-20
21057	Mansfield (Vic.)	1563.39	1.18891	1	2019-20
21058	Nagambie	591.616	1.04916	0.895913	2019-20
21059	Seymour	942.717	1.02782	0.803493	2019-20
21060	Seymour Region	355.607	1.07067	0.938367	2019-20
21061	Upper Yarra Valley	3	1.0822	0.751893	2019-20
21062	Yea	535.525	1.02545	0.737613	2019-20
21063	Benalla	1651.92	1.14117	1	2019-20
21064	Benalla Region	577.872	1.06242	0.942207	2019-20
21065	Rutherglen	614.368	1.14347	0.999753	2019-20
21066	Wangaratta	2685.98	1.1608	1	2019-20
21067	Wangaratta Region	1508.94	1.20443	1	2019-20
21068	Beechworth	824.595	1.20566	1	2019-20
21069	Bright - Mount Beauty	1482.77	1.22921	1	2019-20
21070	Chiltern - Indigo Valley	470.966	1.13478	0.99894	2019-20
21071	Myrtleford	781.95	1.18512	1	2019-20
21072	Towong	945.872	1.07715	0.991967	2019-20
21073	West Wodonga	1677.04	1.13259	1	2019-20
21074	Wodonga	3030.01	1.09339	0.999993	2019-20
21075	Yackandandah	774.192	1.26523	1	2019-20
21076	Drouin	2117.48	1.08592	0.999953	2019-20
21077	Mount Baw Baw Region	853.016	1.14685	1	2019-20
21078	Trafalgar (Vic.)	1074.8	1.13528	1	2019-20
21079	Warragul	2743.03	1.16461	1	2019-20
21081	Bairnsdale	2347.97	1.14419	1	2019-20
21082	Bruthen - Omeo	1106.08	1.15258	0.999993	2019-20
21084	Lakes Entrance	2084.69	1.20809	1	2019-20
21085	Orbost	1290.85	1.11821	0.999973	2019-20
21086	Paynesville	1352.31	1.22624	1	2019-20
21087	Foster	1573.99	1.17882	1	2019-20
21088	French Island	3	0.969109	0.442573	2019-20
21089	Korumburra	1364.82	1.12941	1	2019-20
21090	Leongatha	1671.06	1.17274	1	2019-20
21091	Phillip Island	1954.36	1.17099	1	2019-20
21092	Wilsons Promontory	3	1.04401	0.578387	2019-20
21093	Wonthaggi - Inverloch	4034.57	1.16757	1	2019-20
21094	Churchill	1591.6	1.10873	0.999993	2019-20
21095	Moe - Newborough	2255.9	1.04999	0.98994	2019-20
21096	Morwell	1573.3	0.926257	0.000886667	2019-20
21097	Traralgon	3558.08	1.14601	1	2019-20
21098	Yallourn North - Glengarry	605.21	1.14532	0.999853	2019-20
21099	Alps - West	3	1.14279	0.919293	2019-20
21100	Longford - Loch Sport	610.108	0.999431	0.49412	2019-20
21101	Maffra	1978.11	1.0954	0.99998	2019-20
21102	Rosedale	483.343	1.03274	0.78476	2019-20
21103	Sale	2066.01	1.10639	1	2019-20
21104	Yarram	894.984	1.07123	0.982887	2019-20
21105	Brunswick	1969.96	0.984307	0.237273	2019-20
21106	Brunswick East	888.157	1.07355	0.986547	2019-20
21107	Brunswick West	1250.02	1.04921	0.961647	2019-20
21108	Coburg	2505.82	1.01084	0.708447	2019-20
21109	Pascoe Vale South	1092.99	1.12245	0.999947	2019-20
21110	Alphington - Fairfield	1147.7	1.18612	1	2019-20
21111	Northcote	2693.16	1.15016	1	2019-20
21112	Thornbury	1709.95	1.07718	0.999227	2019-20
21113	Ascot Vale	1501.53	1.11761	1	2019-20
21114	Essendon - Aberfeldie	3392.5	1.18913	1	2019-20
21115	Flemington	793.459	0.939506	0.0292133	2019-20
21116	Moonee Ponds	1729.37	1.11465	1	2019-20
21117	Carlton	817.829	0.846641	0	2019-20
21118	Docklands	797.083	1.00188	0.521867	2019-20
21119	East Melbourne	665.072	1.0392	0.86138	2019-20
21120	Flemington Racecourse	3	1.03395	0.614633	2019-20
21121	Kensington (Vic.)	892.892	1.05194	0.940153	2019-20
21122	Melbourne	2028.64	0.644483	0	2019-20
21123	North Melbourne	1293.14	0.938326	0.00744667	2019-20
21124	Parkville	395.915	0.970677	0.246527	2019-20
21125	South Yarra - West	527.6	0.94464	0.0776467	2019-20
21126	Southbank	1044.73	0.925627	0.0035	2019-20
21128	Albert Park	1943.37	1.06129	0.996333	2019-20
21129	Elwood	1461.48	1.04119	0.942753	2019-20
21130	Port Melbourne	1840.23	1.06568	0.99694	2019-20
21131	Port Melbourne Industrial	205.481	1.07317	0.892187	2019-20
21132	South Melbourne	1410.55	0.990323	0.355033	2019-20
21133	St Kilda	2155.02	0.892866	0	2019-20
21134	St Kilda East	1165.2	0.915926	0.00086	2019-20
21135	Armadale	941.566	0.992208	0.401147	2019-20
21136	Prahran - Windsor	1481.7	0.919997	0.000366667	2019-20
21137	South Yarra - East	1514.71	0.87994	0	2019-20
21138	Toorak	1512.94	0.917147	0.000226667	2019-20
21139	Abbotsford	626.094	1.02759	0.768127	2019-20
21140	Carlton North - Princes Hill	944.871	1.12069	0.999807	2019-20
21141	Collingwood	598.622	0.903689	0.0034	2019-20
21142	Fitzroy	899.565	0.938721	0.0209733	2019-20
21143	Fitzroy North	1243.96	1.094	0.999393	2019-20
21144	Richmond (Vic.)	2753.94	1.03517	0.967607	2019-20
21145	Yarra - North	1231.9	1.20067	1	2019-20
21146	Ashburton (Vic.)	921.293	1.16668	1	2019-20
21147	Balwyn	2170.65	1.10342	1	2019-20
21148	Balwyn North	2708.2	1.0994	1	2019-20
21149	Camberwell	2994.95	1.19227	1	2019-20
21150	Glen Iris - East	2151.12	1.21767	1	2019-20
21151	Hawthorn	2210.04	1.1196	1	2019-20
21152	Hawthorn East	1438.76	1.10846	0.999967	2019-20
21153	Kew	2934.64	1.08624	1	2019-20
21154	Kew East	888.729	1.18624	1	2019-20
21155	Surrey Hills (West) - Canterbury	2284.4	1.19241	1	2019-20
21156	Bulleen	1450.04	1.1163	0.999987	2019-20
21157	Doncaster	2449.4	1.00167	0.532693	2019-20
21159	Templestowe	2369.39	1.07804	0.999867	2019-20
21160	Templestowe Lower	1639.33	1.07158	0.997727	2019-20
21161	Blackburn	2756.96	1.03171	0.91526	2019-20
21162	Blackburn South	1240.73	1.13487	1	2019-20
21163	Box Hill	1852.52	1.01285	0.662233	2019-20
21164	Box Hill North	2055.31	1.04628	0.94676	2019-20
21165	Burwood	968.072	1.21139	1	2019-20
21166	Burwood East	1161.56	1.2462	1	2019-20
21167	Surrey Hills (East) - Mont Albert	1463.27	1.13961	1	2019-20
21168	Beaumaris	2019.84	1.17172	1	2019-20
21169	Brighton (Vic.)	3353.79	1.10916	0.999893	2019-20
21170	Brighton East	2009.2	1.19358	1	2019-20
21171	Cheltenham - Highett (West)	1237.3	1.196	1	2019-20
21172	Hampton	2510.25	1.10883	1	2019-20
21173	Sandringham - Black Rock	2753.57	1.0393	0.943327	2019-20
21174	Bentleigh - McKinnon	2781.5	0.92999	0.000653333	2019-20
21176	Carnegie	1671.54	0.996921	0.445	2019-20
21177	Caulfield - North	1809.15	1.05522	0.97944	2019-20
21178	Caulfield - South	1880.98	1.02311	0.73386	2019-20
21179	Elsternwick	1315.26	1.02887	0.81332	2019-20
21180	Hughesdale	683.217	1.02369	0.79576	2019-20
21181	Murrumbeena	872.051	1.13363	0.999993	2019-20
21182	Ormond - Glen Huntly	1169.64	1.08441	0.905793	2019-20
21183	Aspendale Gardens - Waterways	1102.99	0.987566	0.375673	2019-20
21184	Braeside	157.963	1.03858	0.968867	2019-20
21185	Carrum - Patterson Lakes	1561.76	1.14817	1	2019-20
21186	Chelsea - Bonbeach	1617.94	1.08639	0.9995	2019-20
21187	Chelsea Heights	566.335	1.01871	0.725487	2019-20
21188	Cheltenham - Highett (East)	2373.08	1.14848	1	2019-20
21189	Edithvale - Aspendale	1440.24	1.09186	0.999973	2019-20
21190	Mentone	1581.24	1.107	1	2019-20
21191	Moorabbin - Heatherton	962.474	1.09958	0.99954	2019-20
21193	Mordialloc - Parkdale	2404.15	1.23099	1	2019-20
21194	Malvern - Glen Iris	2274.78	1.17759	1	2019-20
21195	Malvern East	2392.04	0.9675	0.0898667	2019-20
21196	Bundoora - East	1096.64	1.19019	1	2019-20
21197	Greensborough	2878.2	1.22589	1	2019-20
21198	Heidelberg - Rosanna	1813.49	1.21393	1	2019-20
21199	Heidelberg West	1466.02	1.17991	1	2019-20
21200	Ivanhoe	1508.68	1.14116	0.999993	2019-20
21201	Ivanhoe East - Eaglemont	1113.58	1.12579	0.99994	2019-20
21202	Montmorency - Briar Hill	2213.22	0.932071	0.000393333	2019-20
21203	Viewbank - Yallambie	2155.16	0.991053	0.331793	2019-20
21204	Watsonia	1076.42	1.26732	1	2019-20
21205	Kingsbury	1013.47	1.18332	0.999987	2019-20
21207	Reservoir - East	2196.19	1.08648	0.975267	2019-20
21208	Reservoir - West	2230.77	1.20224	1	2019-20
21209	Eltham	3686.67	1.23688	1	2019-20
21210	Hurstbridge	585.971	1.0784	0.984747	2019-20
21211	Kinglake	469.489	1.04552	0.898193	2019-20
21212	Panton Hill - St Andrews	689.847	0.894538	0	2019-20
21213	Plenty - Yarrambat	1372.4	1.05416	0.994167	2019-20
21214	Research - North Warrandyte	1045.21	0.987986	0.32264	2019-20
21215	Wattle Glen - Diamond Creek	1900.89	0.890215	0	2019-20
21216	Bundoora - North	772.555	1.03012	0.897053	2019-20
21217	Bundoora - West	726.642	1.12787	0.99996	2019-20
21219	Lalor	2068.78	1.04706	0.92772	2019-20
21220	Mill Park - North	2171.09	1.11739	0.99998	2019-20
21221	Mill Park - South	1369.54	1.07204	0.99994	2019-20
21223	Thomastown	2055.46	1.1835	1	2019-20
21224	Wallan	1729.99	1.25305	1	2019-20
21225	Whittlesea	1099.76	1.2055	1	2019-20
21226	Airport West	895.894	0.765958	0	2019-20
21228	Keilor	1273.59	0.806156	0	2019-20
21229	Keilor East	3066.69	1.03808	0.96418	2019-20
21230	Niddrie - Essendon West	816.768	1.13185	1	2019-20
21231	Strathmore	1324.93	0.836615	0	2019-20
21232	Gisborne	1715.27	1.02749	0.62148	2019-20
21233	Macedon	511.305	0.897829	0	2019-20
21234	Riddells Creek	646.772	0.959376	0.12376	2019-20
21235	Romsey	1278.7	1.00764	0.613647	2019-20
21236	Coburg North	714.478	1.08846	0.999853	2019-20
21237	Fawkner	974.386	1.12701	0.999867	2019-20
21239	Pascoe Vale	2179.03	1.12576	1	2019-20
21240	Sunbury	1547.33	1.10563	1	2019-20
21241	Sunbury - South	3297.55	1.16346	1	2019-20
21242	Broadmeadows	950.461	1.24397	1	2019-20
21243	Campbellfield - Coolaroo	1321.08	1.0693	0.994347	2019-20
21245	Gladstone Park - Westmeadows	2248.04	1.2286	1	2019-20
21246	Greenvale - Bulla	2166.14	1.07609	0.999373	2019-20
21247	Meadow Heights	1338.56	1.13271	1	2019-20
21248	Melbourne Airport	3	1.2366	1	2019-20
21249	Roxburgh Park - Somerton	1899.93	1.08522	0.99836	2019-20
21250	Tullamarine	684.808	1.16029	1	2019-20
21251	Bayswater	1284.05	1.11476	1	2019-20
21254	Knoxfield - Scoresby	1906.38	1.08737	0.997873	2019-20
21255	Lysterfield	812.347	1.13386	1	2019-20
21256	Rowville - Central	2036.18	1.05032	0.91624	2019-20
21257	Rowville - North	905.909	1.14593	0.99998	2019-20
21258	Rowville - South	1373.93	1.1013	1	2019-20
21259	Wantirna	1776.35	1.0935	0.999727	2019-20
21260	Wantirna South	2360.77	1.10229	0.999653	2019-20
21261	Donvale - Park Orchards	2180.33	1.0882	0.9987	2019-20
21262	Warrandyte - Wonga Park	1651.49	1.08965	0.999987	2019-20
21263	Bayswater North	1327.27	1.0413	0.891967	2019-20
21265	Croydon Hills - Warranwood	2434.27	0.94415	0.01476	2019-20
21266	Ringwood	1870.69	0.983172	0.19816	2019-20
21267	Ringwood East	2309.33	1.11886	1	2019-20
21268	Ringwood North	1284.59	1.00698	0.623487	2019-20
21269	Forest Hill	1196.67	0.860337	0	2019-20
21270	Mitcham (Vic.)	1919.44	0.963301	0.0383867	2019-20
21271	Nunawading	1399.51	0.912713	0.00016	2019-20
21272	Vermont	1248.23	1.03786	0.896647	2019-20
21273	Vermont South	1723.41	0.87121	0	2019-20
21274	Belgrave - Selby	1278.07	0.827052	0	2019-20
21275	Chirnside Park	1374.84	0.898632	0.000173333	2019-20
21276	Healesville - Yarra Glen	1983.53	0.993983	0.424513	2019-20
21277	Kilsyth	998.606	0.956778	0.0403533	2019-20
21278	Lilydale - Coldstream	2415.37	0.911162	0.000613333	2019-20
21279	Monbulk - Silvan	732.027	0.708779	0	2019-20
21280	Montrose	869.885	0.887905	0	2019-20
21281	Mooroolbark	2414.8	1.08588	0.99888	2019-20
21282	Mount Dandenong - Olinda	1426.36	1.03942	0.98292	2019-20
21283	Mount Evelyn	1144.75	0.872719	4e-05	2019-20
21284	Upwey - Tecoma	1169.17	0.989159	0.307193	2019-20
21285	Wandin - Seville	868.173	1.06609	0.994267	2019-20
21286	Yarra Valley	2106.05	1.01633	0.764073	2019-20
21287	Beaconsfield - Officer	1709.23	0.846408	0	2019-20
21288	Bunyip - Garfield	1178.69	1.0988	1	2019-20
21289	Emerald - Cockatoo	2230.29	1.07207	0.999787	2019-20
21290	Koo Wee Rup	853.188	1.13811	1	2019-20
21291	Pakenham - North	1315.95	1.10379	1	2019-20
21292	Pakenham - South	2316.98	0.998857	0.47964	2019-20
21293	Berwick - North	2818.09	0.992861	0.36942	2019-20
21294	Berwick - South	2056.36	1.09886	1	2019-20
21295	Doveton	791.386	0.863045	7.33333e-05	2019-20
21297	Hallam	950.15	1.09462	0.99876	2019-20
21299	Narre Warren North	1069.65	0.93212	0.000446667	2019-20
21300	Cranbourne	1610.92	0.959255	0.0336533	2019-20
21301	Cranbourne East	2150.47	0.998572	0.48282	2019-20
21302	Cranbourne North	1434.6	1.03088	0.874953	2019-20
21303	Cranbourne South	1055.16	0.99315	0.3797	2019-20
21304	Cranbourne West	966.815	1.00097	0.513787	2019-20
21305	Hampton Park - Lynbrook	1953.22	1.09573	1	2019-20
21306	Lynbrook - Lyndhurst	1002.14	1.11737	1	2019-20
21308	Pearcedale - Tooradin	864.068	1.07977	0.999907	2019-20
21309	Clarinda - Oakleigh South	1376.71	1.03903	0.83222	2019-20
21310	Clayton South	1051.61	1.20375	1	2019-20
21311	Dandenong	1772.65	1.00546	0.59242	2019-20
21312	Dandenong North	2110.86	0.933114	0.00582	2019-20
21313	Dingley Village	1306.13	1.1516	1	2019-20
21314	Keysborough	2855.98	1.05786	0.954013	2019-20
21316	Noble Park North	742.944	0.968361	0.160007	2019-20
21317	Springvale	2029.77	1.08099	0.998793	2019-20
21318	Springvale South	1486.25	1.06644	0.99936	2019-20
21319	Ashwood - Chadstone	1864.56	0.916366	3.33333e-05	2019-20
21320	Clayton	911.07	0.945785	0.00980667	2019-20
21321	Glen Waverley - East	2656.91	0.965017	0.204133	2019-20
21322	Glen Waverley - West	2411.93	1.0302	0.873627	2019-20
21323	Mount Waverley - North	1866.45	1.0149	0.75292	2019-20
21324	Mount Waverley - South	2243.05	0.988194	0.293607	2019-20
21325	Mulgrave	2049.44	0.851627	0	2019-20
21326	Oakleigh - Huntingdale	2086.5	0.91138	2e-05	2019-20
21327	Wheelers Hill	2707.2	0.837775	0	2019-20
21328	Ardeer - Albion	588.576	1.0643	0.991267	2019-20
21329	Cairnlea	1051.62	0.958934	0.0424467	2019-20
21330	Deer Park - Derrimut	2056.1	0.883451	0	2019-20
21331	Delahey	974.467	0.937096	0.000533333	2019-20
21332	Keilor Downs	1678.21	0.783014	0	2019-20
21333	Kings Park (Vic.)	1544.29	1.1461	1	2019-20
21334	St Albans - North	1848.9	1.08804	1	2019-20
21335	St Albans - South	1821.84	0.894533	0	2019-20
21336	Sunshine	810.683	0.993057	0.397607	2019-20
21337	Sunshine North	1311.79	1.09842	0.999993	2019-20
21338	Sunshine West	1878.03	1.17871	1	2019-20
21339	Sydenham	1106.94	1.06003	0.999107	2019-20
21340	Taylors Lakes	2549.12	1.11721	1	2019-20
21341	Altona	1672.22	1.16715	1	2019-20
21342	Altona Meadows	2315.42	1.1884	1	2019-20
21343	Altona North	1208.94	1.02454	0.89032	2019-20
21344	Newport	1772.51	1.05536	0.997987	2019-20
21345	Seabrook	510.692	1.04434	0.98182	2019-20
21346	Williamstown	2474.41	1.01639	0.701827	2019-20
21347	Braybrook	1618.13	1.03108	0.749907	2019-20
21348	Footscray	1184.09	1.16399	1	2019-20
21349	Maribyrnong	1390.71	1.16582	0.99986	2019-20
21350	Seddon - Kingsville	758.19	1.0656	0.976393	2019-20
21351	West Footscray - Tottenham	851.327	1.03199	0.787127	2019-20
21352	Yarraville	1426.15	1.0577	0.9744	2019-20
21353	Bacchus Marsh	2462.38	1.00911	0.577913	2019-20
21355	Hillside	1824.19	1.04229	0.915333	2019-20
21356	Melton	1775.85	1.03208	0.866927	2019-20
21357	Melton South	1998.63	0.954997	0.123947	2019-20
21358	Melton West	1617	1.06416	0.907187	2019-20
21359	Rockbank - Mount Cottrell	404.479	0.960778	0.1273	2019-20
21360	Taylors Hill	1351.84	1.04722	0.921493	2019-20
21361	Hoppers Crossing - North	2067.39	1.08863	0.999547	2019-20
21362	Hoppers Crossing - South	2018.3	1.02796	0.780787	2019-20
21363	Laverton	608.011	1.08883	0.999973	2019-20
21365	Tarneit	1801.95	1.05292	0.975493	2019-20
21366	Truganina	975.406	1.05166	0.875027	2019-20
21368	Werribee - South	1370.15	1.06145	0.94166	2019-20
21369	Wyndham Vale	1596.06	1.07454	0.96966	2019-20
21370	Carrum Downs	1785.15	1.09142	0.99998	2019-20
21371	Frankston	2400.49	1.10081	1	2019-20
21372	Frankston North	1540.63	1.11279	0.995033	2019-20
21373	Frankston South	2266.35	1.04695	0.95126	2019-20
21374	Langwarrin	2773.86	1.09289	0.99964	2019-20
21375	Seaford (Vic.)	1657.79	1.15302	1	2019-20
21376	Skye - Sandhurst	1258.14	1.06912	0.997453	2019-20
21377	Dromana	1790.11	1.09072	0.99688	2019-20
21378	Flinders	902.556	1.10587	1	2019-20
21379	Hastings - Somers	2847.32	1.0421	0.623293	2019-20
21380	Mornington	3551.72	1.03188	0.89438	2019-20
21381	Mount Eliza	2592.88	0.984951	0.454807	2019-20
21382	Mount Martha	2558.33	0.948188	0.00977333	2019-20
21383	Point Nepean	2480.78	1.00765	0.517207	2019-20
21384	Rosebud - McCrae	2909.78	1.02643	0.57336	2019-20
21385	Somerville	2303.72	0.986374	0.304413	2019-20
21386	Ararat	1008.11	0.900408	0.261007	2019-20
21387	Ararat Region	382.862	0.970214	0.371253	2019-20
21388	Horsham	2198.9	0.934533	0.377813	2019-20
21389	Horsham Region	450.237	1.03218	0.84504	2019-20
21390	Nhill Region	937.43	0.984544	0.4423	2019-20
21391	St Arnaud	513.34	0.967318	0.365787	2019-20
21392	Stawell	1133.62	0.914709	0.000133333	2019-20
21393	West Wimmera	378.889	1.02231	0.595293	2019-20
21394	Yarriambiack	987.472	0.955715	0.325347	2019-20
21395	Irymple	1118.19	0.964994	0.358047	2019-20
21396	Merbein	494.733	0.982624	0.446733	2019-20
21398	Mildura Region	406.04	0.972881	0.331173	2019-20
21399	Red Cliffs	657.244	0.923796	0.0097	2019-20
21400	Buloke	855.099	0.963705	0.35494	2019-20
21401	Gannawarra	1003.13	1.04068	0.959153	2019-20
21402	Kerang	565.404	0.939672	0.38574	2019-20
21403	Robinvale	347.965	1.0657	0.99452	2019-20
21404	Swan Hill	1447.33	0.86196	0.183247	2019-20
21405	Swan Hill Region	721.148	0.941563	0.257387	2019-20
21406	Echuca	2148.69	0.94811	0.0201867	2019-20
21407	Kyabram	1365.89	0.920956	0.213167	2019-20
21408	Lockington - Gunbower	436.07	0.949887	0.29236	2019-20
21409	Rochester	552.561	0.909917	0.000106667	2019-20
21410	Rushworth	588.779	1.05432	0.975087	2019-20
21411	Cobram	959.304	0.85211	0.117573	2019-20
21412	Moira	372.997	0.962752	0.317507	2019-20
21413	Numurkah	1594.09	0.913591	3.33333e-05	2019-20
21414	Yarrawonga	1370.9	1.01905	0.667433	2019-20
21415	Mooroopna	1042.61	0.84308	0.12666	2019-20
21416	Shepparton - North	2023.04	0.857386	0.124873	2019-20
21417	Shepparton - South	2947.3	0.857676	0.125427	2019-20
21418	Shepparton Region - East	526.283	0.924731	0.203453	2019-20
21419	Shepparton Region - West	1270.97	0.880944	8.66667e-05	2019-20
21420	Glenelg (Vic.)	1346.26	0.995223	0.480113	2019-20
21421	Hamilton (Vic.)	1495.9	1.00459	0.573207	2019-20
21422	Portland	1709.67	0.887046	0	2019-20
21423	Southern Grampians	951.213	0.9953	0.478373	2019-20
21424	Doncaster East (North)	2266.96	1.21738	1	2019-20
21425	Doncaster East (South)	3	1.1199	0.999987	2019-20
21426	Bentleigh East (North)	1561.28	1.05427	0.984847	2019-20
21427	Bentleigh East (South)	3	1.05613	0.98716	2019-20
21428	Preston - East	1810.19	1.25453	1	2019-20
21429	Preston - West	3	1.26602	1	2019-20
21430	Doreen	3	1.13267	0.998593	2019-20
21431	Epping - East	1258.64	1.22975	1	2019-20
21432	Epping - South	3	1.0874	0.999087	2019-20
21433	Epping - West	3	1.03737	0.843007	2019-20
21434	Mernda	3	0.895982	0.00014	2019-20
21435	South Morang (North)	969.693	1.06063	0.997393	2019-20
21436	South Morang (South)	3	1.14459	1	2019-20
21437	Wollert	3	1.09238	0.999993	2019-20
21438	Glenroy	1553.29	1.11157	0.9996	2019-20
21439	Gowanbrae	3	1.12175	1	2019-20
21440	Hadfield	3	1.11323	0.999993	2019-20
21441	Craigieburn - Central	3	1.16404	1	2019-20
21442	Craigieburn - North	3	1.16495	1	2019-20
21443	Craigieburn - South	3	1.16708	1	2019-20
21444	Craigieburn - West	787.832	1.1125	0.999913	2019-20
21445	Mickleham - Yuroke	3	1.18402	1	2019-20
21446	Boronia	2359.76	1.04472	0.942747	2019-20
21447	Ferntree Gully (North)	3	1.16429	1	2019-20
21448	Ferntree Gully (South) - Upper Ferntree Gully	1837.71	0.983454	0.215607	2019-20
21449	The Basin	3	1.13012	1	2019-20
21450	Croydon - East	1565.94	0.777139	0	2019-20
21451	Croydon - West	3	0.852611	0	2019-20
21452	Croydon South	3	1.13195	1	2019-20
21453	Endeavour Hills - North	1355.47	1.02869	0.821287	2019-20
21454	Endeavour Hills - South	3	1.00878	0.641327	2019-20
21455	Narre Warren - North East	3	0.932445	0.00234	2019-20
21456	Narre Warren - South West	1327.06	0.899161	0	2019-20
21457	Narre Warren South (East)	1298.73	0.91736	0.000893333	2019-20
21458	Narre Warren South (West)	3	1.07706	0.999187	2019-20
21459	Noble Park - East	3	1.02183	0.8291	2019-20
21460	Noble Park - West	1673.89	0.907584	0	2019-20
21461	Burnside	496.49	1.06203	0.97446	2019-20
21462	Burnside Heights	3	1.05727	0.920893	2019-20
21463	Caroline Springs	3	0.877317	0.00253333	2019-20
21464	Point Cook - East	3	1.03297	0.851893	2019-20
21465	Point Cook - North	3	1.05853	0.896567	2019-20
21466	Point Cook - South	688.279	1.04258	0.953747	2019-20
21467	Werribee - East	3	1.17681	1	2019-20
21468	Werribee - West	1645.4	1.03792	0.89242	2019-20
21469	Mildura - North	1382.94	0.980195	0.442267	2019-20
21470	Mildura - South	3	1.03963	0.971893	2019-20
21471	Camperdown	536.437	1.09451	0.983567	2019-20
21472	Colac	1501.24	1.05533	0.98146	2019-20
21473	Colac Region	737.551	1.04362	0.894987	2019-20
21474	Corangamite - North	694.874	0.986366	0.346473	2019-20
21475	Corangamite - South	965.095	1.0826	0.994647	2019-20
21476	Otway	613.628	1.07512	0.967753	2019-20
21477	Moyne - East	806.832	1.00915	0.608993	2019-20
21478	Moyne - West	1420.39	1.13598	1	2019-20
21479	Warrnambool - North	2522.38	1.12832	1	2019-20
21480	Warrnambool - South	1958.56	1.13015	1	2019-20
31001	Alexandra Hills	1620.12	0.900502	0	2019-20
31002	Belmont - Gumdale	782.054	1.01571	0.681187	2019-20
31003	Birkdale	1735.58	1.05227	0.984187	2019-20
31004	Capalaba	2019.2	0.939092	0.00191333	2019-20
31005	Thorneside	410.144	0.966649	0.235373	2019-20
31006	Wellington Point	1408.69	1.0727	0.995893	2019-20
31007	Cleveland	2148.33	0.964782	0.0457	2019-20
31008	Ormiston	849.521	1.05216	0.934653	2019-20
31009	Redland Bay	1651.97	0.990232	0.341607	2019-20
31011	Sheldon - Mount Cotton	700.126	0.989596	0.377947	2019-20
31012	Thornlands	1544.72	0.98216	0.233467	2019-20
31013	Victoria Point	2039.74	1.0221	0.83946	2019-20
31014	Brisbane Port - Lytton	3	1.00364	0.542993	2019-20
31015	Manly - Lota	797.45	1.02621	0.834073	2019-20
31016	Manly West	1323.97	0.989098	0.4096	2019-20
31017	Murarrie	346.567	0.965428	0.138267	2019-20
31018	Tingalpa	870.163	0.995986	0.45242	2019-20
31019	Wakerley	730.479	0.981705	0.2219	2019-20
31020	Wynnum	1627.4	0.887924	2e-05	2019-20
31021	Wynnum West - Hemmant	1279.93	1.00178	0.51972	2019-20
31022	Bald Hills	709.64	1.10156	0.999347	2019-20
31023	Bridgeman Downs	980.017	1.10029	0.998833	2019-20
31024	Carseldine	941.63	0.995759	0.451253	2019-20
31025	Everton Park	733.546	1.06191	0.960673	2019-20
31026	McDowall	758.557	0.962531	0.0791733	2019-20
31027	Aspley	1211.42	0.869907	6.66667e-06	2019-20
31028	Chermside	767.654	1.03149	0.790433	2019-20
31029	Chermside West	598.952	0.95408	0.10334	2019-20
31030	Geebung	609.895	0.957404	0.0724133	2019-20
31031	Kedron - Gordon Park	994.727	0.927628	0.0284333	2019-20
31032	Stafford	482.214	0.982047	0.31526	2019-20
31033	Stafford Heights	605.463	1.04612	0.915933	2019-20
31034	Wavell Heights	861.298	0.990981	0.386067	2019-20
31035	Boondall	902.005	0.931221	0.208253	2019-20
31036	Brisbane Airport	3	0.912532	0.08178	2019-20
31037	Eagle Farm - Pinkenba	118.864	0.923985	0.0177933	2019-20
31038	Northgate - Virginia	640.927	0.925791	0.01058	2019-20
31039	Nudgee - Banyo	785.172	0.881155	6.66667e-06	2019-20
31040	Nundah	1042.88	1.02187	0.819833	2019-20
31041	Bracken Ridge	1677.13	1.00307	0.53976	2019-20
31042	Brighton (Qld)	1001.87	0.958017	0.12314	2019-20
31043	Deagon	656.558	1.08479	0.989907	2019-20
31044	Sandgate - Shorncliffe	765.189	0.953648	0.0529867	2019-20
31045	Taigum - Fitzgibbon	1069.25	0.834242	0	2019-20
31046	Zillmere	588.671	0.994568	0.435073	2019-20
31047	Camp Hill	821.013	0.921238	0.03278	2019-20
31048	Cannon Hill	391.095	0.959986	0.107553	2019-20
31049	Carina	833.745	0.961687	0.15952	2019-20
31050	Carina Heights	531.039	1.06664	0.9987	2019-20
31051	Carindale	2106.02	0.928774	0.00901333	2019-20
31052	Annerley	883.329	0.94541	0.0162	2019-20
31053	Coorparoo	1323.13	0.986667	0.385993	2019-20
31054	Fairfield - Dutton Park	364.226	0.836877	6.66667e-06	2019-20
31055	Greenslopes	639.033	0.982702	0.312807	2019-20
31056	Holland Park	670.838	0.972348	0.22624	2019-20
31057	Holland Park West	611.289	0.842459	5.33333e-05	2019-20
31058	Woolloongabba	392.374	1.03068	0.835547	2019-20
31059	Yeronga	920.015	0.934762	0.00444667	2019-20
31060	Eight Mile Plains	1356.96	0.929925	0.00878667	2019-20
31061	Macgregor (Qld)	867.596	1.00049	0.505747	2019-20
31062	Mansfield (Qld)	799.112	0.912	0.00064	2019-20
31063	Mount Gravatt	1075.05	1.02366	0.761553	2019-20
31064	Rochedale - Burbank	764.311	0.890062	0.000113333	2019-20
31065	Upper Mount Gravatt	864.145	1.0226	0.77612	2019-20
31066	Wishart	1051.79	0.831165	0	2019-20
31067	Coopers Plains	425.511	0.994069	0.428453	2019-20
31068	Moorooka	845.126	0.896094	0.00686	2019-20
31069	Robertson	407.358	0.950379	0.0969	2019-20
31070	Salisbury - Nathan	569.719	1.02778	0.811987	2019-20
31071	Tarragindi	878.753	0.875087	6.66667e-05	2019-20
31072	Algester	694.856	0.953148	0.01766	2019-20
31073	Calamvale - Stretton	1803.89	0.903652	0.00764667	2019-20
31074	Pallara - Willawong	419.329	0.970634	0.130073	2019-20
31075	Parkinson - Drewvale	1301.29	0.733154	0	2019-20
31076	Rocklea - Acacia Ridge	638.237	0.983976	0.315667	2019-20
31077	Kuraby	675.369	0.961608	0.0877333	2019-20
31078	Runcorn	1106.25	0.894705	0.00092	2019-20
31079	Sunnybank	674.867	0.887471	0	2019-20
31080	Sunnybank Hills	1497.73	0.949919	0.069	2019-20
31081	Jindalee - Mount Ommaney	736.137	1.0263	0.769327	2019-20
31082	Middle Park - Jamboree Heights	762.846	0.935368	0.0792	2019-20
31083	Riverhills	344.623	1.11794	0.999853	2019-20
31084	Seventeen Mile Rocks - Sinnamon Park	1034.63	1.04309	0.84832	2019-20
31085	Westlake	533.228	1.06054	0.969387	2019-20
31086	Bellbowrie - Moggill	975.69	1.04269	0.886933	2019-20
31087	Brookfield - Kenmore Hills	759.944	1.06513	0.985193	2019-20
31088	Chapel Hill	1112.72	1.06204	0.905387	2019-20
31089	Fig Tree Pocket	415.816	1.01928	0.74686	2019-20
31090	Kenmore	1182.76	1.05025	0.89464	2019-20
31091	Pinjarra Hills - Pullenvale	578.221	1.08104	0.98422	2019-20
31092	Chelmer - Graceville	684.489	1.07199	0.936847	2019-20
31093	Corinda	462.895	0.973947	0.18868	2019-20
31094	Indooroopilly	1052.15	1.06248	0.964313	2019-20
31095	Sherwood	815.702	0.896881	0.00209333	2019-20
31096	St Lucia	604.089	0.916929	0.0190667	2019-20
31097	Taringa	518.936	0.992666	0.41372	2019-20
31098	Enoggera	795.76	0.981745	0.417387	2019-20
31099	Enoggera Reservoir	3	0.909147	0.00871333	2019-20
31100	Keperra	535.89	1.00565	0.572793	2019-20
31101	Mitchelton	983.26	1.07969	0.99956	2019-20
31103	The Gap	1900.53	1.13295	0.999973	2019-20
31104	Upper Kedron - Ferny Grove	1076.53	0.723975	0	2019-20
31105	Brisbane City	986.862	0.775888	0	2019-20
31106	Fortitude Valley	284.207	0.943948	0.08434	2019-20
31107	Highgate Hill	486.072	0.88965	0.000533333	2019-20
31108	Kangaroo Point	704.368	0.8866	4.66667e-05	2019-20
31109	New Farm	892.743	0.890345	0.00092	2019-20
31110	South Brisbane	662.166	0.831546	0.000206667	2019-20
31111	Spring Hill	256.811	0.929968	0.0163267	2019-20
31112	West End	771.918	0.991285	0.43256	2019-20
31113	Balmoral	336.499	1.02514	0.763793	2019-20
31114	Bulimba	794.221	0.884084	0.00298	2019-20
31115	East Brisbane	425.207	1.00284	0.524633	2019-20
31116	Hawthorne	399.499	0.931366	0.00746667	2019-20
31117	Morningside - Seven Hills	1068.57	0.97606	0.271733	2019-20
31118	Norman Park	475.507	0.894906	0.0226333	2019-20
31119	Albion	228.521	1.01523	0.64134	2019-20
31120	Alderley	464.682	0.835881	4e-05	2019-20
31121	Ascot	396.745	0.924213	0.00612667	2019-20
31122	Clayfield	870.646	1.00969	0.579953	2019-20
31123	Grange	347.906	0.90125	0.000786667	2019-20
31124	Hamilton (Qld)	778.921	0.993079	0.440773	2019-20
31125	Hendra	420.462	0.955427	0.124507	2019-20
31126	Kelvin Grove - Herston	558.579	1.0819	0.954907	2019-20
31127	Newmarket	349.713	0.969538	0.1202	2019-20
31128	Newstead - Bowen Hills	1320.25	1.06393	0.902867	2019-20
31129	Wilston	340.04	0.972166	0.228927	2019-20
31130	Windsor	614.746	0.903831	0.00182	2019-20
31131	Wooloowin - Lutwyche	679.096	1.04066	0.931087	2019-20
31132	Ashgrove	1308.83	0.915518	0.0265067	2019-20
31133	Auchenflower	365.149	1.0558	0.948707	2019-20
31134	Bardon	869.748	0.970685	0.158987	2019-20
31135	Paddington - Milton	1017.58	0.930169	0.0619733	2019-20
31136	Red Hill (Qld)	369.911	1.00223	0.529973	2019-20
31137	Toowong	1015.32	1.00485	0.544053	2019-20
31138	Brinsmead	471.585	0.972184	0.13006	2019-20
31139	Clifton Beach - Kewarra Beach	1507.33	0.959995	0.201427	2019-20
31140	Freshwater - Stratford	346.34	1.0295	0.833687	2019-20
31141	Redlynch	1028.85	0.950333	0.01942	2019-20
31142	Trinity Beach - Smithfield	1508.05	0.804606	0	2019-20
31143	Yorkeys Knob - Machans Beach	543.48	0.81218	0	2019-20
31144	Bentley Park	430.005	0.889563	0	2019-20
31145	Cairns City	2668.54	0.887645	0.00032	2019-20
31146	Earlville - Bayview Heights	714.351	0.853256	0	2019-20
31147	Edmonton	873.164	0.903684	0.00136	2019-20
31148	Gordonvale - Trinity	777.313	0.914545	0.00300667	2019-20
31149	Kanimbla - Mooroobool	822.034	0.668786	0	2019-20
31151	Manoora	377.007	0.69177	0	2019-20
31152	Manunda	346.924	0.963492	0.149547	2019-20
31153	Mount Sheridan	682.618	0.687643	0	2019-20
31154	Westcourt - Bungalow	389.708	0.780031	0	2019-20
31155	White Rock	326.423	0.934811	0.02496	2019-20
31156	Whitfield - Edge Hill	732.328	0.778738	0	2019-20
31157	Woree	417.612	0.914346	0.0452467	2019-20
31158	Babinda	276.719	0.931104	0.00501333	2019-20
31159	Innisfail	1201.92	0.931083	0.0360733	2019-20
31160	Johnstone	584.156	0.946448	0.0168267	2019-20
31161	Tully	1372.83	0.42977	0	2019-20
31163	Yarrabah	64.4048	0.943299	0.0423533	2019-20
31164	Daintree	814.86	0.916642	0.0109533	2019-20
31165	Port Douglas	624.806	1.04319	0.95228	2019-20
31166	Atherton	1514.66	0.921813	0.00697333	2019-20
31167	Herberton	834.222	0.837403	0	2019-20
31168	Kuranda	640.742	1.09923	0.999573	2019-20
31169	Malanda - Yungaburra	1200.62	0.915597	0.000466667	2019-20
31170	Mareeba	1262.81	0.801973	0	2019-20
31171	Balonne	355.544	0.869319	7.33333e-05	2019-20
31172	Chinchilla	637.818	0.878086	0.00022	2019-20
31173	Goondiwindi	556.366	0.90092	0.0138667	2019-20
31174	Inglewood - Waggamba	388.132	0.852328	0.00016	2019-20
31175	Miles - Wandoan	316.674	0.845241	0	2019-20
31176	Roma	562.483	0.921151	0.0339867	2019-20
31177	Roma Region	462.047	0.88654	0.00192	2019-20
31178	Tara	424.606	1.00483	0.567967	2019-20
31179	Crows Nest - Rosalie	1100.67	0.894628	0.00046	2019-20
31180	Jondaryan	706.445	0.891071	0.00544	2019-20
31181	Millmerran	366.967	0.947266	0.0724	2019-20
31182	Pittsworth	586.477	0.874658	0	2019-20
31183	Wambo	1470.09	0.940178	0.05286	2019-20
31184	Clifton - Greenmount	548.639	0.960551	0.154367	2019-20
31185	Southern Downs - East	542.864	0.921505	0.0173533	2019-20
31186	Southern Downs - West	579.127	1.00533	0.569833	2019-20
31187	Stanthorpe	886.486	1.03116	0.79938	2019-20
31188	Stanthorpe Region	737.474	0.925377	0.000386667	2019-20
31189	Warwick	1731.59	0.682618	0	2019-20
31190	Central Highlands - East	318.771	0.786243	0	2019-20
31191	Central Highlands - West	354.455	0.88152	1.33333e-05	2019-20
31192	Emerald	943.835	0.753102	0	2019-20
31205	Berserker	446.001	0.949223	0.19132	2019-20
31206	Bouldercombe	188.814	0.980483	0.278533	2019-20
31207	Emu Park	747.577	0.999408	0.493127	2019-20
31208	Frenchville - Mount Archer	842.351	1.10939	0.990567	2019-20
31209	Glenlee - Rockyview	453.674	0.850837	0	2019-20
31210	Gracemere	1096.69	0.801711	0	2019-20
31211	Lakes Creek	340.001	0.843937	0.00012	2019-20
31212	Mount Morgan	356.892	1.08984	0.999127	2019-20
31213	Norman Gardens	1296.85	0.849379	9.33333e-05	2019-20
31214	Park Avenue	373.821	0.894017	0.00338	2019-20
31215	Parkhurst - Kawana	474.949	0.881903	0.00120667	2019-20
31216	Rockhampton - West	466.738	0.827059	0	2019-20
31217	Rockhampton City	690.722	0.927565	0.05044	2019-20
31218	Rockhampton Region - East	343.15	0.993798	0.438213	2019-20
31219	Rockhampton Region - North	472.824	0.9146	0.0373267	2019-20
31220	Rockhampton Region - West	252.145	0.88283	0.0559867	2019-20
31221	Shoalwater Bay	3	0.865321	0.000173333	2019-20
31222	The Range - Allenstown	555.893	1.04364	0.98448	2019-20
31223	Yeppoon	2505.24	0.938104	0.0317067	2019-20
31224	Broadbeach Waters	776.475	0.895603	0	2019-20
31225	Burleigh Heads	855.9	0.90792	0.000286667	2019-20
31226	Burleigh Waters	1468.54	0.840936	0	2019-20
31227	Mermaid Beach - Broadbeach	1763.8	0.974391	0.17566	2019-20
31228	Mermaid Waters	1217.47	0.961013	0.0861267	2019-20
31229	Miami	1156.04	0.892873	0.00386667	2019-20
31230	Coolangatta	905.719	0.992319	0.36396	2019-20
31231	Currumbin - Tugun	1364.33	0.952059	0.0700867	2019-20
31232	Currumbin Waters	977.55	0.947935	0.00670667	2019-20
31233	Elanora	1308.51	0.952765	0.07792	2019-20
31234	Palm Beach	1692.07	0.888041	0	2019-20
31235	Arundel	1143.16	0.92518	0.00728	2019-20
31236	Biggera Waters	1558.94	0.874847	0	2019-20
31237	Coombabah	1107.53	0.880247	6.66667e-06	2019-20
31238	Labrador	1667.05	0.957778	0.0944333	2019-20
31239	Paradise Point - Hollywell	1193.91	0.853295	0	2019-20
31240	Runaway Bay	1058.98	0.942905	0.0062	2019-20
31241	Guanaba - Springbrook	453.996	0.926835	0.00034	2019-20
31242	Tamborine - Canungra	1995.52	0.903289	0.00798	2019-20
31243	Currumbin Valley - Tallebudgera	813.571	0.919306	0.000233333	2019-20
31244	Mudgeeraba - Bonogin	1993.56	0.932311	0.00295333	2019-20
31245	Reedy Creek - Andrews	774.787	0.890605	0.00016	2019-20
31246	Carrara	1553.74	0.859579	0	2019-20
31247	Highland Park	837.951	0.911216	0.0168533	2019-20
31248	Nerang - Mount Nathan	1874.06	0.847128	6.66667e-06	2019-20
31249	Pacific Pines - Gaven	1354.36	0.978636	0.1269	2019-20
31250	Worongary - Tallai	845.366	0.934617	0.00537333	2019-20
31251	Coomera	843.261	0.921339	0.000406667	2019-20
31252	Helensvale	1733.32	0.900148	0.00054	2019-20
31253	Hope Island	1796.39	0.935592	0.0226867	2019-20
31254	Jacobs Well - Alberton	441.424	0.933677	0.0175933	2019-20
31255	Ormeau - Yatala	1627.56	0.88838	0.00233333	2019-20
31256	Oxenford - Maudsland	1400.02	0.956245	0.151107	2019-20
31257	Pimpama	833.056	0.82689	0	2019-20
31258	Upper Coomera - Willow Vale	2327.08	0.904182	0.00256667	2019-20
31259	Clear Island Waters	447.836	0.956753	0.1041	2019-20
31260	Merrimac	533.875	0.923329	6e-05	2019-20
31261	Robina	2706.45	0.789929	0	2019-20
31262	Varsity Lakes	1314.45	0.969797	0.212753	2019-20
31263	Ashmore	1618	0.782392	0	2019-20
31264	Molendinar	815.787	0.958848	0.05056	2019-20
31265	Parkwood	851.807	0.917821	0.00639333	2019-20
31267	Benowa	843.64	0.880457	0	2019-20
31268	Bundall	436.503	0.856475	0	2019-20
31269	Main Beach	417.511	0.747173	0	2019-20
31270	Surfers Paradise	2293.26	0.894798	0.00272	2019-20
31271	Darra - Sumner	594.159	0.814083	0	2019-20
31272	Durack	714.348	0.790948	0	2019-20
31273	Forest Lake - Doolandella	2396.75	0.977538	0.2935	2019-20
31274	Inala - Richlands	1292.15	1.00072	0.50758	2019-20
31275	Oxley (Qld)	571.96	0.967129	0.178693	2019-20
31276	Wacol	208.524	0.730096	0	2019-20
31277	Boonah	1437.87	0.80385	0	2019-20
31278	Esk	730.177	0.868195	0	2019-20
31280	Lockyer Valley - East	2027.15	0.990682	0.40436	2019-20
31281	Lowood	1275.16	0.673467	0	2019-20
31282	Rosewood	1202.02	0.887447	2e-05	2019-20
31283	Brassall	1167.06	0.895968	0.000333333	2019-20
31284	Bundamba	710.292	0.818488	0.0180933	2019-20
31285	Churchill - Yamanto	510.144	0.825154	0	2019-20
31286	Ipswich - Central	515.911	0.671385	0	2019-20
31287	Ipswich - East	1282.58	0.693641	0	2019-20
31288	Ipswich - North	474.668	0.859855	0.00012	2019-20
31289	Karalee - Barellan Point	609.643	0.869806	0	2019-20
31290	Karana Downs	622.469	0.846986	0	2019-20
31291	Leichhardt - One Mile	477.577	0.709144	0	2019-20
31292	North Ipswich - Tivoli	491.142	0.746633	0	2019-20
31293	Raceview	1078.11	0.82835	0	2019-20
31294	Ripley	542.25	0.892866	0.00160667	2019-20
31295	Riverview	166.908	0.972306	0.22648	2019-20
31296	Bellbird Park - Brookwater	922.364	0.842898	0	2019-20
31297	Camira - Gailes	853.227	0.796257	0	2019-20
31298	Carole Park	3	0.876403	0.000493333	2019-20
31299	Collingwood Park - Redbank	579.223	0.68644	0	2019-20
31300	Goodna	585.684	0.884817	0.000166667	2019-20
31302	Redbank Plains	984.322	0.683012	0	2019-20
31303	Springfield	429.58	0.866072	0.000353333	2019-20
31304	Springfield Lakes	964.781	0.85032	0	2019-20
31305	Beaudesert	1348.22	0.927059	0.00258667	2019-20
31306	Beenleigh	600.976	0.848536	0	2019-20
31307	Eagleby	1004.13	0.937294	0.0246	2019-20
31308	Edens Landing - Holmview	538.849	0.885379	0.000106667	2019-20
31309	Mount Warren Park	540.702	0.976145	0.218193	2019-20
31310	Wolffdene - Bahrs Scrub	647.475	0.851428	0	2019-20
31311	Boronia Heights - Park Ridge	1204.8	0.756335	0	2019-20
31312	Browns Plains	639.841	0.943315	0.0164133	2019-20
31313	Chambers Flat - Logan Reserve	551.748	0.766161	0	2019-20
31314	Crestmead	635.651	0.877887	0.000173333	2019-20
31316	Hillcrest	732.205	0.681082	0	2019-20
31317	Marsden	775.805	0.668057	0	2019-20
31318	Munruben - Park Ridge South	484.416	0.921651	0.00106667	2019-20
31319	Regents Park - Heritage Park	1220.76	0.740645	0	2019-20
31320	Greenbank	1240.09	0.861126	0	2019-20
31321	Jimboomba	2375.11	0.885613	0.000813333	2019-20
31322	Logan Village	799.402	0.670626	0	2019-20
31323	Bethania - Waterford	804.177	0.882254	3.33333e-05	2019-20
31324	Cornubia - Carbrook	958.201	0.789116	0	2019-20
31325	Loganholme - Tanah Merah	1047.82	0.883727	0.00626667	2019-20
31326	Loganlea	704.848	0.859171	0.00176667	2019-20
31327	Shailer Park	1183.8	0.772998	0	2019-20
31328	Waterford West	523.246	0.974878	0.174647	2019-20
31329	Daisy Hill	582.579	0.929422	0.0732667	2019-20
31330	Kingston (Qld.)	661.583	0.909931	0.00242667	2019-20
31331	Logan Central	490.784	0.913031	0.192847	2019-20
31332	Rochedale South - Priestdale	1322.52	0.961425	0.06864	2019-20
31333	Slacks Creek	964.512	0.863796	0.0197267	2019-20
31334	Springwood	847.307	1.09893	0.9987	2019-20
31335	Underwood	513.353	0.874239	0.000446667	2019-20
31336	Woodridge	755.8	1.04334	0.829733	2019-20
31337	Bowen	1026.86	0.974378	0.241647	2019-20
31338	Broadsound - Nebo	401.304	0.936244	0.00586	2019-20
31339	Clermont	255.803	1.02656	0.787813	2019-20
31340	Collinsville	247.909	0.977973	0.287347	2019-20
31341	Moranbah	322.968	0.838657	0.000386667	2019-20
31342	Andergrove - Beaconsfield	1261.01	0.932018	0.02952	2019-20
31343	East Mackay	297.908	1.05915	0.981613	2019-20
31344	Eimeo - Rural View	791.715	0.958809	0.147593	2019-20
31345	Eungella Hinterland	3	0.940043	0.00541333	2019-20
31346	Mackay	1296.29	0.999151	0.491787	2019-20
31347	Mackay Harbour	36.8585	0.993017	0.373733	2019-20
31348	Mount Pleasant - Glenella	985.516	1.06923	0.999973	2019-20
31349	North Mackay	473.041	1.02819	0.77604	2019-20
31350	Ooralea - Bakers Creek	428.374	0.862379	0	2019-20
31351	Pioneer Valley	710.84	0.842729	0	2019-20
31352	Sarina	1277.14	1.03522	0.772973	2019-20
31353	Seaforth - Calen	829.511	0.915491	0.00222667	2019-20
31354	Shoal Point - Bucasia	499.359	1.07814	0.961333	2019-20
31355	Slade Point	300.728	0.976892	0.27002	2019-20
31356	South Mackay	613.673	0.934172	0.0226067	2019-20
31357	Walkerston - Eton	1299.38	1.03702	0.930407	2019-20
31358	West Mackay	522.895	0.838046	0	2019-20
31359	Airlie - Whitsundays	1601.9	0.989664	0.39478	2019-20
31361	Proserpine	544.269	1.02375	0.830287	2019-20
31362	Beachmere - Sandstone Point	2075.81	0.98037	0.34154	2019-20
31363	Bribie Island	3562.12	0.976168	0.19622	2019-20
31364	Burpengary - East	696.837	0.930395	0.00239333	2019-20
31365	Caboolture	2497.93	0.93932	0.0038	2019-20
31366	Caboolture - South	1541.17	0.949944	0.01382	2019-20
31367	Elimbah	424.719	1.08634	0.99992	2019-20
31368	Morayfield - East	880.871	1.11518	1	2019-20
31369	Wamuran	520.304	1.07161	0.98976	2019-20
31370	Kilcoy	639.645	1.06309	0.96644	2019-20
31371	Woodford - D'Aguilar	777.832	1.05072	0.992613	2019-20
31372	Burpengary	1595.71	1.08992	0.999793	2019-20
31373	Deception Bay	2033.83	0.872995	0	2019-20
31374	Morayfield	642.293	0.99654	0.444293	2019-20
31375	Narangba	1657.41	0.966049	0.0433533	2019-20
31376	Upper Caboolture	337.568	0.915876	0.00265333	2019-20
31377	Clontarf	1214.94	0.91184	0.0120733	2019-20
31378	Margate - Woody Point	1426.81	1.00558	0.569007	2019-20
31379	Redcliffe	1667.07	0.858413	0	2019-20
31380	Rothwell - Kippa-Ring	1702.43	0.7848	0.00545333	2019-20
31382	Albany Creek	1922.1	0.931968	0.0574267	2019-20
31383	Cashmere	1787.57	0.641314	6.66667e-06	2019-20
31384	Dayboro	1055.89	0.577199	0	2019-20
31385	Eatons Hill	771.99	0.827	6.66667e-06	2019-20
31386	The Hills District	2343.82	0.840005	0.01744	2019-20
31387	Samford Valley	1655.34	0.435088	0	2019-20
31388	Dakabin - Kallangur	1877.38	0.710528	7.33333e-05	2019-20
31389	Murrumba Downs - Griffin	1538.25	0.519842	0	2019-20
31390	North Lakes - Mango Hill	2344.93	0.570251	0	2019-20
31391	Bray Park	889.882	0.508136	0	2019-20
31392	Lawnton	550.757	0.77303	0	2019-20
31393	Petrie	920.389	0.864088	0.000306667	2019-20
31394	Strathpine - Brendale	1280.91	0.88592	0.00284667	2019-20
31395	Aurukun	3	0.725784	6.66667e-06	2019-20
31396	Cape York	549.541	0.786597	0	2019-20
31397	Croydon - Etheridge	404.395	0.860526	0.000926667	2019-20
31398	Kowanyama - Pormpuraaw	3	1.05577	0.996807	2019-20
31399	Northern Peninsula	80.4652	1.07808	0.999347	2019-20
31400	Tablelands	406.232	0.989194	0.357247	2019-20
31401	Torres	3	1.03206	0.813793	2019-20
31402	Torres Strait Islands	154.755	1.04523	0.935107	2019-20
31403	Weipa	3	1.01264	0.635767	2019-20
31404	Carpentaria	153.435	0.963711	0.117747	2019-20
31405	Mount Isa	745.068	1.08783	1	2019-20
31406	Mount Isa Region	155.814	1.09239	0.999947	2019-20
31407	Northern Highlands	242.862	1.04289	0.911087	2019-20
31408	Barcaldine - Blackall	468.764	1.05445	0.968373	2019-20
31409	Charleville	377.953	1.01942	0.75726	2019-20
31410	Far Central West	152.596	1.07066	0.998093	2019-20
31411	Far South West	236.165	1.07672	0.999147	2019-20
31412	Longreach	317.478	0.990419	0.302193	2019-20
31413	Buderim - North	2541.33	1.01244	0.6946	2019-20
31414	Buderim - South	1901.87	1.0238	0.7962	2019-20
31415	Mountain Creek	946.369	1.04734	0.970633	2019-20
31416	Sippy Downs	750.81	0.988276	0.365753	2019-20
31417	Aroona - Currimundi	1174.47	1.04373	0.958453	2019-20
31418	Buddina - Minyama	751.029	0.966736	0.135127	2019-20
31419	Caloundra - Kings Beach	875.676	1.00268	0.54098	2019-20
31420	Caloundra - West	3057.9	1.01202	0.63806	2019-20
31421	Golden Beach - Pelican Waters	1823.19	1.00975	0.640647	2019-20
31422	Moffat Beach - Battery Hill	936.287	0.995996	0.45306	2019-20
31423	Parrearra - Warana	1101.48	1.05034	0.971633	2019-20
31424	Wurtulla - Birtinya	1256.93	1.01332	0.635853	2019-20
31425	Coolum Beach	1688.68	0.938926	0.02258	2019-20
31426	Marcoola - Mudjimba	1640.54	0.915777	0.00432667	2019-20
31427	Maroochydore - Kuluin	2881.83	0.891636	0.00214667	2019-20
31428	Mooloolaba - Alexandra Headland	1616.56	1.01045	0.606753	2019-20
31434	Noosa Heads	1137.37	1.09322	0.99978	2019-20
31435	Noosaville	1600.15	0.945637	0.0192267	2019-20
31437	Sunshine Beach	754.31	1.08772	0.99052	2019-20
31438	Tewantin	1596.75	0.817433	0	2019-20
31439	Beerwah	992.468	0.927361	6.66667e-05	2019-20
31440	Caloundra Hinterland	1482.7	0.940703	0.0288267	2019-20
31441	Glass House Mountains	747.636	1.0283	0.837133	2019-20
31442	Landsborough	1348.01	0.901163	4.66667e-05	2019-20
31443	Maroochy Hinterland	855.64	0.782322	0	2019-20
31444	Palmwoods	1456.65	0.816387	0	2019-20
31445	Cambooya - Wyreema	637.826	0.7881	6.66667e-06	2019-20
31446	Darling Heights	927.427	0.982527	0.3064	2019-20
31447	Drayton - Harristown	787.051	0.94733	0.14404	2019-20
31448	Gatton	524.721	0.899319	0.000673333	2019-20
31449	Gowrie (Qld)	589.425	0.751717	0	2019-20
31450	Highfields	1567.03	0.80354	0	2019-20
31451	Lockyer Valley - West	1271.44	0.814415	0	2019-20
31452	Middle Ridge	739.961	0.936028	0.08366	2019-20
31453	Newtown (Qld)	714.195	0.76827	0	2019-20
31454	North Toowoomba - Harlaxton	429.866	0.755028	0	2019-20
31455	Rangeville	824.028	0.699289	0	2019-20
31456	Toowoomba - Central	2384.71	0.752902	0	2019-20
31457	Toowoomba - East	833.04	0.744637	0	2019-20
31458	Toowoomba - West	1184.31	0.734261	0	2019-20
31459	Wilsonton	1206.66	0.746272	0	2019-20
31460	Ayr	892.181	0.90681	0.00022	2019-20
31461	Burdekin	582.187	0.946936	0.119267	2019-20
31462	Charters Towers	767.833	0.877723	0.00056	2019-20
31463	Dalrymple	84.3862	0.899292	0.00902	2019-20
31464	Ingham	271.558	0.724676	0	2019-20
31465	Ingham Region	760.204	0.809869	0	2019-20
31466	Palm Island	120.557	0.733028	0	2019-20
31467	Aitkenvale	311.294	0.896244	0.00534	2019-20
31468	Annandale	741.751	0.873578	0	2019-20
31469	Belgian Gardens - Pallarenda	291.286	0.810681	0	2019-20
31470	Bohle Plains	848.799	1.05694	0.91626	2019-20
31471	Condon - Rasmussen	709.072	1.12545	1	2019-20
31472	Cranbrook	431.463	1.03392	0.801873	2019-20
31473	Deeragun	1299.51	0.974392	0.149987	2019-20
31474	Douglas	354.781	1.00874	0.589493	2019-20
31475	Garbutt - West End	869.901	1.03509	0.85332	2019-20
31476	Gulliver - Currajong - Vincent	729.515	1.00018	0.50266	2019-20
31477	Heatley	263.855	1.04417	0.961327	2019-20
31478	Hermit Park - Rosslea	339.01	1.03448	0.832233	2019-20
31479	Hyde Park - Pimlico	327.998	0.938806	0.05768	2019-20
31480	Kelso	670.381	0.976387	0.21446	2019-20
31481	Kirwan - East	581.94	1.00003	0.500307	2019-20
31482	Kirwan - West	1255.6	1.03492	0.83152	2019-20
31483	Magnetic Island	392.324	0.994177	0.41804	2019-20
31484	Mount Louisa	580.192	0.928312	0.00393333	2019-20
31485	Mundingburra	293.696	1.02552	0.701707	2019-20
31486	Northern Beaches	534.207	0.901137	0.00452667	2019-20
31487	Oonoonba	464.707	0.928554	0.00204	2019-20
31488	South Townsville - Railway Estate	356.711	0.960879	0.35128	2019-20
31489	Townsville - South	422.469	1.09983	0.999813	2019-20
31490	Townsville City - North Ward	1174.94	0.898971	2.66667e-05	2019-20
31491	Wulguru - Roseneath	440.116	1.01661	0.687473	2019-20
31492	Ashfield - Kepnock	494.858	0.985061	0.230873	2019-20
31493	Bargara - Burnett Heads	2389.15	0.916743	0.0155867	2019-20
31494	Branyan - Kensington	518.778	1.05676	0.939527	2019-20
31495	Bundaberg	1528.4	1.11849	0.999473	2019-20
31496	Bundaberg East - Kalkie	555.508	1.05436	0.98772	2019-20
31497	Bundaberg North - Gooburrum	800.797	1.0259	0.76714	2019-20
31498	Bundaberg Region - North	1165.07	0.982098	0.214053	2019-20
31499	Bundaberg Region - South	1560.52	1.05823	0.99816	2019-20
31500	Millbank - Avoca	700.209	1.05587	0.989187	2019-20
31501	Svensson Heights - Norville	532.137	1.02665	0.719393	2019-20
31502	Walkervale - Avenell Heights	1024.39	0.945487	0.0023	2019-20
31503	Gayndah - Mundubbera	792.447	1.00155	0.527787	2019-20
31504	Gin Gin	723.908	1.14172	0.999953	2019-20
31505	Kingaroy	1220.33	0.867731	0	2019-20
31506	Kingaroy Region - North	1130.9	0.842386	6.66667e-06	2019-20
31507	Kingaroy Region - South	353.334	1.00493	0.55128	2019-20
31508	Monto - Eidsvold	517.851	0.997171	0.462187	2019-20
31509	Nanango	1382.79	0.904238	0.00123333	2019-20
31510	North Burnett	3	0.981101	0.43512	2019-20
31511	Cooloola	1337.55	0.8277	0	2019-20
31512	Gympie - North	1419.71	0.794886	0	2019-20
31513	Gympie - South	801.543	0.859453	0	2019-20
31514	Gympie Region	2350.86	0.864711	0.00116667	2019-20
31515	Kilkivan	491.315	0.869724	0.00098	2019-20
31516	Booral - River Heads	705.78	0.787031	0	2019-20
31517	Craignish - Dundowran Beach	756.797	0.865519	0.137547	2019-20
31518	Pialba - Eli Waters	1789.38	0.825627	0	2019-20
31519	Point Vernon	728.379	1.10502	0.999993	2019-20
31520	Torquay - Scarness - Kawungan	1789.61	0.860983	0.129573	2019-20
31521	Urangan - Wondunna	2564.68	1.06973	0.99228	2019-20
31522	Burrum - Fraser	1726.25	1.08801	0.99976	2019-20
31523	Granville	420.797	0.980668	0.31152	2019-20
31524	Maryborough (Qld)	2444.58	0.961829	0.0605933	2019-20
31525	Maryborough Region - South	1877.17	0.911265	0	2019-20
31526	Tinana	862.556	1.05232	0.99844	2019-20
31527	Redland Islands	1518.57	0.926001	0.35986	2019-20
31528	Banana	549.989	0.933081	0.0113667	2019-20
31529	Biloela	580.953	1.04088	0.936127	2019-20
31530	Agnes Water - Miriam Vale	996.272	0.963835	0.05802	2019-20
31531	Boyne Island - Tannum Sands	784.114	0.954003	0.0461667	2019-20
31532	Callemondah	3	0.951139	0.0382933	2019-20
31533	Clinton - New Auckland	770.608	0.899509	0.00032	2019-20
31534	Gladstone	963.061	0.918429	0.000646667	2019-20
31535	Gladstone Hinterland	808.401	0.941536	0.0203267	2019-20
31536	Kin Kora - Sun Valley	277.926	1.0431	0.940873	2019-20
31538	Telina - Toolooa	371.057	0.957662	0.03314	2019-20
31539	West Gladstone	347.894	1.01138	0.652927	2019-20
31540	Southport - North	3	0.890327	0	2019-20
31541	Southport - South	1402.05	0.838664	0	2019-20
31542	Scarborough - Newport - Moreton Island	1929.19	0.638416	0	2019-20
31543	Peregian Beach - Marcus Beach	3	0.822748	6.66667e-06	2019-20
31544	Peregian Springs	1278.82	1.04218	0.890053	2019-20
31545	Bli Bli	1658.63	0.778438	0	2019-20
31546	Diddillibah - Rosemount	575.272	0.834682	0.00757333	2019-20
31547	Eumundi - Yandina	1502	0.739833	0	2019-20
31548	Nambour	1905.01	0.843324	0	2019-20
31549	Noosa Hinterland	3362.13	0.604825	0	2019-20
41001	Adelaide	1650.77	0.839685	0	2019-20
41002	North Adelaide	908.265	1.06677	0.97924	2019-20
41003	Adelaide Hills	1059.35	1.2166	1	2019-20
41004	Aldgate - Stirling	2728.11	1.19579	1	2019-20
41005	Hahndorf - Echunga	549.996	1.20073	1	2019-20
41006	Lobethal - Woodside	1359.88	1.1786	1	2019-20
41007	Mount Barker	2508.3	1.14356	1	2019-20
41008	Mount Barker Region	1638.72	1.21358	1	2019-20
41009	Nairne	117.664	1.05645	0.763293	2019-20
41010	Uraidla - Summertown	851.109	1.128	0.999913	2019-20
41011	Burnside - Wattle Park	2479.38	1.15339	1	2019-20
41012	Glenside - Beaumont	1452.67	1.19911	1	2019-20
41013	Toorak Gardens	2197.38	1.18208	1	2019-20
41014	Athelstone	1330.89	1.15399	1	2019-20
41015	Paradise - Newton	2155.07	1.03648	0.955287	2019-20
41016	Rostrevor - Magill	2339.59	1.08242	0.999953	2019-20
41017	Norwood (SA)	1462.39	1.06443	0.99262	2019-20
41018	Payneham - Felixstow	1210.27	1.06809	0.990907	2019-20
41019	St Peters - Marden	1831.15	1.18231	1	2019-20
41020	Nailsworth - Broadview	706.569	1.19954	1	2019-20
41021	Prospect	1740.19	1.13906	1	2019-20
41022	Walkerville	1055.78	1.14654	0.999993	2019-20
41023	Goodwood - Millswood	2218.58	1.15439	1	2019-20
41024	Unley - Parkside	2651.7	1.1353	1	2019-20
41025	Gawler - North	949.548	1.14807	1	2019-20
41026	Gawler - South	2845.26	1.10089	1	2019-20
41027	Lewiston - Two Wells	779.337	0.98756	0.357587	2019-20
41028	Craigmore - Blakeview	1940.36	1.03882	0.95596	2019-20
41029	Davoren Park	977.668	0.764445	0	2019-20
41030	Elizabeth	814.994	0.758975	0	2019-20
41031	Elizabeth East	1182.58	0.916039	0.0007	2019-20
41032	Munno Para West - Angle Vale	918.14	1.00145	0.519473	2019-20
41033	One Tree Hill	291.144	1.22045	0.999993	2019-20
41034	Smithfield - Elizabeth North	976.741	0.781008	0	2019-20
41035	Virginia - Waterloo Corner	550.589	0.916243	0.0111933	2019-20
41036	Enfield - Blair Athol	1837.01	0.934643	0.00121333	2019-20
41037	Northgate - Oakden - Gilles Plains	2534.38	1.0849	0.999993	2019-20
41038	Windsor Gardens	1821.9	1.0484	0.981267	2019-20
41040	Ingle Farm	1750.58	1.06307	0.99524	2019-20
41041	Para Hills	1631.24	1.05698	0.989127	2019-20
41042	Parafield	3	1.04912	0.696747	2019-20
41043	Parafield Gardens	1797.34	1.02713	0.875047	2019-20
41044	Paralowie	1692.4	0.956823	0.03078	2019-20
41046	Salisbury	1616.6	0.923825	0.000366667	2019-20
41047	Salisbury East	1894.54	0.9927	0.370507	2019-20
41048	Salisbury North	1394.87	0.90807	5.33333e-05	2019-20
41049	Golden Grove	1596.8	1.18331	1	2019-20
41050	Greenwith	1142.13	1.06712	0.996993	2019-20
41051	Highbury - Dernancourt	1527.59	1.15381	1	2019-20
41052	Hope Valley - Modbury	1835.41	1.13536	1	2019-20
41053	Modbury Heights	2649.52	1.16491	1	2019-20
41054	Redwood Park	2093.72	1.29647	1	2019-20
41055	St Agnes - Ridgehaven	1760.29	1.19299	1	2019-20
41056	Brighton (SA)	2251.83	1.05471	0.98214	2019-20
41057	Glenelg (SA)	3086.42	1.26922	1	2019-20
41058	Edwardstown	1517.74	1.22491	1	2019-20
41059	Hallett Cove	2058.1	1.05222	0.978613	2019-20
41060	Marino - Seaview Downs	1363.63	1.11624	0.999993	2019-20
41061	Mitchell Park	1544.23	1.19244	1	2019-20
41062	Morphettville	1662.03	1.13672	1	2019-20
41063	Sheidow Park - Trott Park	1212.04	1.25911	1	2019-20
41064	Warradale	2112.32	1.15625	0.999987	2019-20
41065	Belair	752.864	1.24439	1	2019-20
41066	Bellevue Heights	830.031	1.19783	1	2019-20
41067	Blackwood	1895.68	1.2171	1	2019-20
41068	Colonel Light Gardens	1865	1.13423	0.999933	2019-20
41069	Mitcham (SA)	2348.41	1.24864	1	2019-20
41070	Panorama	905.302	1.09374	0.999973	2019-20
41071	Aberfoyle Park	1735.99	0.986221	0.31946	2019-20
41072	Aldinga	1828.32	1.04048	0.929527	2019-20
41073	Christie Downs	1065.57	1.21008	1	2019-20
41074	Christies Beach	1305.44	1.24636	1	2019-20
41075	Clarendon	505.782	1.25025	1	2019-20
41076	Coromandel Valley	612.679	1.07652	0.98328	2019-20
41077	Flagstaff Hill	1603.86	0.926223	0.0105933	2019-20
41078	Hackham - Onkaparinga Hills	788.196	1.2108	1	2019-20
41079	Hackham West - Huntfield Heights	748.465	0.934765	0.220473	2019-20
41080	Happy Valley	2038.16	1.24066	1	2019-20
41082	Lonsdale	52.9205	1.0655	0.99544	2019-20
41083	McLaren Vale	1151.79	1.00834	0.621693	2019-20
41084	Morphett Vale - East	1615.43	1.10489	0.999787	2019-20
41085	Morphett Vale - West	1268.62	1.12788	1	2019-20
41086	Reynella	1214.25	1.25655	1	2019-20
41087	Seaford (SA)	2566.83	1.2227	1	2019-20
41088	Willunga	605.569	1.05186	0.933373	2019-20
41089	Woodcroft	1452.62	1.12806	1	2019-20
41090	Beverley	812.637	1.20739	1	2019-20
41091	Flinders Park	1737.08	1.00724	0.62542	2019-20
41092	Henley Beach	2176.42	0.981196	0.300473	2019-20
41093	Hindmarsh - Brompton	1835.88	1.07814	0.9997	2019-20
41094	Royal Park - Hendon - Albert Park	671.301	1.17028	1	2019-20
41095	Seaton - Grange	1966.06	1.01462	0.74148	2019-20
41096	West Lakes	2419.45	1.1217	1	2019-20
41097	Woodville - Cheltenham	1922.36	1.03907	0.954473	2019-20
41099	Largs Bay - Semaphore	2008.7	0.881072	0	2019-20
41100	North Haven	1884.53	0.93079	0.00141333	2019-20
41101	Port Adelaide	1207.34	1.04508	0.6653	2019-20
41102	The Parks	1684	1.17139	0.99954	2019-20
41103	Torrens Island	3	1.11231	0.99998	2019-20
41105	Fulham	349.525	1.10037	0.999987	2019-20
41106	Lockleys	1504.33	0.967349	0.08634	2019-20
41107	Plympton	2520.47	1.20691	1	2019-20
41108	Richmond (SA)	1591.32	1.1068	0.99634	2019-20
41109	West Beach	780.233	1.1342	1	2019-20
41110	Barossa - Angaston	598.457	1.19834	1	2019-20
41111	Light	1083.58	1.09046	0.956787	2019-20
41112	Lyndoch	890.113	1.20195	1	2019-20
41113	Mallala	214.739	1.22853	1	2019-20
41114	Nuriootpa	1092.59	1.16539	0.999987	2019-20
41115	Tanunda	834.766	1.13637	0.99956	2019-20
41116	Clare	732.227	1.03569	0.807527	2019-20
41117	Gilbert Valley	659.15	1.12718	0.999993	2019-20
41118	Goyder	603.1	1.17614	0.999993	2019-20
41119	Wakefield - Barunga West	1190.85	1.11917	0.99976	2019-20
41120	Jamestown	699.662	1.00417	0.571167	2019-20
41121	Peterborough - Mount Remarkable	838.745	1.12673	0.993353	2019-20
41122	Port Pirie	1796.52	1.09065	0.992827	2019-20
41123	Port Pirie Region	351.138	1.17937	0.999993	2019-20
41124	Kadina	784.993	1.18853	1	2019-20
41125	Moonta	895.137	1.20434	1	2019-20
41126	Wallaroo	717.161	1.32307	1	2019-20
41127	Yorke Peninsula - North	1174.12	0.936154	0.0854067	2019-20
41128	Yorke Peninsula - South	1042.43	1.11573	0.998787	2019-20
41129	Ceduna	348.351	1.15384	0.999653	2019-20
41130	Eyre Peninsula	750.748	1.06349	0.869487	2019-20
41131	Kimba - Cleve - Franklin Harbour	564.314	1.06175	0.996953	2019-20
41132	Le Hunte - Elliston	299.035	1.14496	0.998793	2019-20
41133	Port Lincoln	2058.6	0.955855	0.41964	2019-20
41134	West Coast (SA)	455.57	0.975368	0.107893	2019-20
41135	Western	3	0.812978	0.0246933	2019-20
41136	Whyalla	2346.79	0.668199	0	2019-20
41138	APY Lands	3	0.976689	0.336833	2019-20
41139	Coober Pedy	142.755	0.705054	0	2019-20
41140	Quorn - Lake Gilles	254.305	0.902766	1.33333e-05	2019-20
41141	Outback	141.968	0.912182	0.0183133	2019-20
41142	Port Augusta	1416.39	1.2108	1	2019-20
41143	Roxby Downs	171.992	1.06636	0.95934	2019-20
41144	Goolwa - Port Elliot	2338.82	1.13063	1	2019-20
41145	Kangaroo Island	743.737	1.14023	0.999887	2019-20
41146	Strathalbyn	1148.1	1.22037	1	2019-20
41147	Strathalbyn Region	782.232	1.17386	1	2019-20
41148	Victor Harbor	2907.24	0.971737	0.334353	2019-20
41149	Yankalilla	1003.63	1.12384	0.998213	2019-20
41150	Grant	185.226	0.945088	0.101393	2019-20
41151	Kingston - Robe	562.109	1.02369	0.75634	2019-20
41152	Millicent	409.111	1.03035	0.667387	2019-20
41154	Naracoorte	814.818	1.10388	0.982193	2019-20
41155	Naracoorte Region	192.321	1.10065	0.997893	2019-20
41156	Penola	450.51	1.12425	0.999607	2019-20
41157	Tatiara	809.899	1.05378	0.932407	2019-20
41158	Wattle Range	757.178	1.01569	0.67522	2019-20
41159	Barmera	717.755	1.10468	0.93456	2019-20
41160	Berri	781.057	1.1722	1	2019-20
41161	Karoonda - Lameroo	393.173	1.00176	0.53362	2019-20
41162	Loxton	883.63	1.02896	0.675207	2019-20
41163	Loxton Region	126.021	1.0043	0.556413	2019-20
41164	Mannum	1272.25	1.154	0.99308	2019-20
41165	Murray Bridge	2217.97	0.997697	0.47518	2019-20
41166	Murray Bridge Region	218.453	1.10824	0.999687	2019-20
41167	Renmark	982.678	0.909462	0.275753	2019-20
41168	Renmark Region	192.823	0.997859	0.473913	2019-20
41169	The Coorong	709.575	1.05855	0.724867	2019-20
41170	Waikerie	1057.31	1.03592	0.942467	2019-20
41171	Mawson Lakes - Globe Derby Park	3	1.25475	1	2019-20
41172	Pooraka - Cavan	805.767	1.20996	1	2019-20
41173	Mount Gambier - East	3	1.0963	0.970087	2019-20
41174	Mount Gambier - West	1872.31	1.1846	1	2019-20
51001	Augusta	886.003	1.17691	1	2019-20
51002	Busselton	4030.61	1.21538	1	2019-20
51003	Busselton Region	1501.2	1.23271	1	2019-20
51004	Margaret River	1174.04	1.09661	0.999273	2019-20
51005	Australind - Leschenault	2203.22	1.13164	1	2019-20
51007	Capel	766.338	1.10172	0.997747	2019-20
51008	College Grove - Carey Park	640.896	1.00907	0.598927	2019-20
51009	Collie	1164.7	1.02659	0.82444	2019-20
51010	Dardanup	412.413	1.16137	0.999733	2019-20
51011	Davenport	3	1.04878	0.66206	2019-20
51012	Eaton - Pelican Point	1341.74	1.13064	1	2019-20
51014	Harvey	1166.36	1.09354	0.999193	2019-20
51015	East Bunbury - Glen Iris	821.678	1.05677	0.952453	2019-20
51016	Waroona	557.953	1.07247	0.958093	2019-20
51017	Bridgetown - Boyup Brook	1119.57	1.16548	1	2019-20
51018	Donnybrook - Balingup	973.763	1.15277	1	2019-20
51019	Manjimup	897.359	0.983863	0.298407	2019-20
51020	Pemberton	843.234	1.18988	1	2019-20
51021	Dawesville - Bouvard	1184.94	1.01712	0.77788	2019-20
51022	Falcon - Wannanup	1318.42	1.09628	0.9979	2019-20
51023	Greenfields	1006.21	1.14238	1	2019-20
51024	Halls Head - Erskine	2746.19	1.06589	0.99236	2019-20
51025	Mandurah	2054.91	1.02766	0.827887	2019-20
51026	Mandurah - East	959.697	1.21021	1	2019-20
51027	Mandurah - North	1937.24	1.06608	0.987047	2019-20
51028	Mandurah - South	1461.15	1.14011	0.999993	2019-20
51029	Pinjarra	1168.07	1.25722	1	2019-20
51030	City Beach	870.603	1.01757	0.7273	2019-20
51031	Claremont (WA)	1137.98	1.0235	0.851607	2019-20
51032	Cottesloe	1104.72	1.16601	1	2019-20
51033	Floreat	1017.46	0.98547	0.444487	2019-20
51034	Mosman Park - Peppermint Grove	1142.88	1.12379	0.999953	2019-20
51035	Nedlands - Dalkeith - Crawley	1973.04	1.105	1	2019-20
51036	Swanbourne - Mount Claremont	1046.8	1.07538	0.990933	2019-20
51037	Kings Park (WA)	3	0.806516	0	2019-20
51038	Mount Hawthorn - Leederville	1156.98	1.09842	1	2019-20
51039	Mount Lawley - Inglewood	2019.07	1.09073	0.9999	2019-20
51040	North Perth	975.742	1.00657	0.605287	2019-20
51041	Perth City	2647.82	1.04722	0.988487	2019-20
51042	Subiaco - Shenton Park	2184.29	0.948381	0.03452	2019-20
51043	Wembley - West Leederville - Glendalough	1790.56	0.99686	0.438153	2019-20
51044	Bassendean - Eden Hill - Ashfield	1610.39	1.08645	0.9969	2019-20
51045	Bayswater - Embleton - Bedford	2370.18	1.1042	0.9867	2019-20
51046	Maylands	1043.25	1.16382	1	2019-20
51047	Morley	2311.39	1.09366	0.992693	2019-20
51048	Noranda	1078.23	1.04021	0.633253	2019-20
51049	Chidlow	421.044	1.14948	1	2019-20
51050	Glen Forrest - Darlington	1098.17	0.993735	0.404193	2019-20
51051	Helena Valley - Koongamia	660.78	1.01254	0.548333	2019-20
51052	Malmalling - Reservoir	3	1.03817	0.959447	2019-20
51053	Mundaring	1895.19	0.967894	0.08854	2019-20
51054	Swan View - Greenmount - Midvale	1373.24	1.02676	0.739553	2019-20
51055	Avon Valley National Park	3	0.987902	0.264693	2019-20
51056	Ballajura	2101.68	1.07471	0.941567	2019-20
51057	Beechboro	1595.97	1.00653	0.562513	2019-20
51058	Bullsbrook	506.896	0.967373	0.142533	2019-20
51059	Ellenbrook	2603.98	0.961696	0.32352	2019-20
51060	Gidgegannup	390.588	0.955814	0.115027	2019-20
51061	Hazelmere - Guildford	458.312	0.897871	3.33333e-05	2019-20
51062	Lockridge - Kiara	929.293	0.991509	0.410147	2019-20
51063	Malaga	63.0273	1.13716	1	2019-20
51065	Middle Swan - Herne Hill	568.281	1.0181	0.725793	2019-20
51066	Midland - Guildford	1233.6	1.14543	1	2019-20
51067	Stratton - Jane Brook	622.502	1.2224	1	2019-20
51068	The Vines	1163.2	1.08019	0.999393	2019-20
51070	Craigie - Beldon	1004.7	1.13604	1	2019-20
51071	Currambine - Kinross	1726.8	1.23198	1	2019-20
51072	Duncraig	2198.98	1.32033	1	2019-20
51073	Greenwood - Warwick	1760.16	1.08582	0.999887	2019-20
51074	Heathridge - Connolly	1347.08	1.19571	1	2019-20
51075	Hillarys	1904.87	1.20474	1	2019-20
51076	Iluka - Burns Beach	1475.74	1.27402	1	2019-20
51077	Joondalup - Edgewater	1854.05	1.12032	0.99992	2019-20
51078	Kingsley	1857.1	1.25369	1	2019-20
51079	Mullaloo - Kallaroo	1690.7	1.27717	1	2019-20
51080	Ocean Reef	1359.98	1.03227	0.900307	2019-20
51081	Padbury	986.844	0.848376	0	2019-20
51082	Sorrento - Marmion	1648.28	1.07851	0.99996	2019-20
51083	Woodvale	1568.63	1.0918	0.99986	2019-20
51084	Balcatta - Hamersley	1560.11	1.21105	1	2019-20
51085	Balga - Mirrabooka	1447.47	0.931026	0.00460667	2019-20
51086	Dianella	2732.03	1.05645	0.7447	2019-20
51088	Innaloo - Doubleview	1715.07	1.06129	0.991073	2019-20
51089	Karrinyup - Gwelup - Carine	2699.58	1.06761	0.99494	2019-20
51090	Nollamara - Westminster	1188.54	1.2695	1	2019-20
51091	Osborne Park Industrial	3	1.01022	0.63356	2019-20
51092	Scarborough	1517.87	1.21675	1	2019-20
51093	Stirling - Osborne Park	1464.41	1.0501	0.976613	2019-20
51094	Trigg - North Beach - Watermans Bay	1339.85	0.928541	0.00492667	2019-20
51095	Tuart Hill - Joondanna	990.216	0.956639	0.0306067	2019-20
51096	Wembley Downs - Churchlands - Woodlands	1665.81	1.00241	0.535387	2019-20
51097	Yokine - Coolbinia - Menora	1560.07	0.94766	0.02486	2019-20
51098	Alexander Heights - Koondoola	1112.4	0.88773	0.0002	2019-20
51099	Butler - Merriwa - Ridgewood	1655.33	1.09489	0.999993	2019-20
51100	Carramar	1225.96	0.996115	0.448033	2019-20
51101	Clarkson	1194.49	1.15683	1	2019-20
51102	Girrawheen	737.735	0.957193	0.3524	2019-20
51103	Madeley - Darch - Landsdale	2442.45	1.10026	0.99964	2019-20
51104	Marangaroo	1067.55	1.03548	0.963107	2019-20
51105	Mindarie - Quinns Rocks - Jindalee	2411	0.846189	0	2019-20
51106	Neerabup National Park	3	1.06875	0.805007	2019-20
51107	Tapping - Ashby - Sinagra	1224.84	0.941626	0.06354	2019-20
51108	Wanneroo	2599.8	1.09211	0.999213	2019-20
51110	Armadale - Wungong - Brookdale	1642.41	0.94363	0.0144467	2019-20
51111	Ashendon - Lesley	3	0.979238	0.211853	2019-20
51112	Camillo - Champion Lakes	559.917	1.01048	0.539767	2019-20
51113	Forrestdale - Harrisdale - Piara Waters	1219.92	1.02414	0.60574	2019-20
51114	Kelmscott	1159.95	0.923477	0.000113333	2019-20
51115	Mount Nasura - Mount Richon - Bedfordale	1157.67	0.994601	0.417913	2019-20
51116	Roleystone	1061.42	0.969371	0.120673	2019-20
51117	Seville Grove	649.628	1.12651	0.999987	2019-20
51118	Belmont - Ascot - Redcliffe	1290.56	0.903921	0.000106667	2019-20
51119	East Victoria Park - Carlisle	1325.23	1.04186	0.955287	2019-20
51120	Kewdale Commercial	3	1.148	1	2019-20
51121	Perth Airport	3	0.962448	0.314533	2019-20
51122	Rivervale - Kewdale - Cloverdale	2034.93	1.14093	1	2019-20
51123	Victoria Park - Lathlain - Burswood	1376.33	0.869197	0	2019-20
51124	Bentley - Wilson - St James	1317.78	1.14973	1	2019-20
51125	Canning Vale - West	1348.92	0.87547	0	2019-20
51127	Cannington - Queens Park	1205.99	1.03358	0.91832	2019-20
51128	Parkwood - Ferndale - Lynwood	1637.89	0.886615	6.66667e-06	2019-20
51129	Riverton - Shelley - Rossmoyne	1792.7	1.00882	0.67378	2019-20
51130	Welshpool	49.7476	0.972887	0.118613	2019-20
51131	Willetton	2307.58	0.990178	0.366273	2019-20
51132	Beckenham - Kenwick - Langford	1538.17	1.16035	1	2019-20
51133	Canning Vale - East	2116.29	1.16464	1	2019-20
51134	Gosnells	1697.92	1.01494	0.705107	2019-20
51135	Huntingdale - Southern River	1720.65	1.09396	0.99562	2019-20
51136	Maddington - Orange Grove - Martin	1171.91	1.14037	0.999733	2019-20
51137	Thornlie	2588.16	1.04654	0.959327	2019-20
51138	Forrestfield - Wattle Grove	1702.03	1.12949	1	2019-20
51139	High Wycombe	1125.2	1.07051	0.999027	2019-20
51140	Kalamunda - Maida Vale - Gooseberry Hill	2426.7	1.1347	1	2019-20
51141	Lesmurdie - Bickley - Carmel	1497.51	1.15948	0.99284	2019-20
51142	Byford	1252.94	1.14889	1	2019-20
51143	Mundijong	790.578	0.998594	0.482627	2019-20
51144	Serpentine - Jarrahdale	585.254	0.892291	4.66667e-05	2019-20
51145	Como	1379.23	1.07307	0.70434	2019-20
51146	Manning - Waterford	1270.27	1.26128	1	2019-20
51147	South Perth - Kensington	2057.48	0.965748	0.115647	2019-20
51148	Banjup	1478.95	0.969557	0.133493	2019-20
51150	Bibra Industrial	114.959	1.08774	0.9984	2019-20
51152	Coogee	1094.69	0.987171	0.356587	2019-20
51153	Coolbellup	809.951	1.16185	1	2019-20
51154	Hamilton Hill	1015.42	1.04104	0.968953	2019-20
51155	Henderson	3	1.06515	0.996813	2019-20
51158	North Coogee	425.593	0.951775	0.33408	2019-20
51159	South Lake - Cockburn Central	1099.43	0.992247	0.406473	2019-20
51160	Spearwood	1134.81	0.793648	0	2019-20
51161	Success - Hammond Park	1153.51	0.974624	0.401653	2019-20
51163	Yangebup	701.866	0.916731	0.201393	2019-20
51164	East Fremantle	1018.01	1.23041	1	2019-20
51165	Fremantle	2097.11	1.16495	1	2019-20
51166	Fremantle - South	1839.59	1.11874	1	2019-20
51167	O'Connor (WA)	3	1.17708	1	2019-20
51169	Bertram - Wellard (West)	799.324	1.23759	1	2019-20
51170	Calista	619.893	1.20063	1	2019-20
51172	Hope Valley - Postans	3	1.16749	1	2019-20
51173	Kwinana Industrial	3	0.952929	0.15166	2019-20
51174	Parmelia - Orelia	887.265	1.12171	0.999773	2019-20
51175	Applecross - Ardross	1637.47	0.902766	0.000713333	2019-20
51176	Bateman	502.351	1.03964	0.927133	2019-20
51177	Bicton - Palmyra	1707.05	1.04046	0.97082	2019-20
51178	Booragoon	1842.95	1.0167	0.56902	2019-20
51179	Bull Creek	1067.33	1.10505	0.999993	2019-20
51180	Leeming	1727.16	1.12152	1	2019-20
51181	Melville	2140.69	1.0163	0.734213	2019-20
51182	Murdoch - Kardinya	1584.13	1.02026	0.768933	2019-20
51183	Willagee	375.654	1.16366	1	2019-20
51184	Winthrop	930.41	1.16338	0.99958	2019-20
51185	Baldivis	2468.64	1.18646	1	2019-20
51186	Cooloongup	928.118	1.16554	1	2019-20
51187	Port Kennedy	1340.47	1.02027	0.656573	2019-20
51188	Rockingham	2222.8	0.952879	0.124547	2019-20
51189	Rockingham Lakes	3	1.03589	0.817327	2019-20
51190	Safety Bay - Shoalwater	1752.92	1.31692	1	2019-20
51191	Singleton - Golden Bay - Secret Harbour	1856.75	1.09749	0.999207	2019-20
51192	Waikiki	1407.73	1.08609	0.991953	2019-20
51193	Warnbro	1174.19	1.05926	0.956653	2019-20
51225	Albany	2813.71	0.964154	0.203627	2019-20
51226	Albany Region	422.979	0.963999	0.188473	2019-20
51227	Bayonet Head - Lower King	627.417	1.10925	0.99988	2019-20
51228	Denmark	1102.4	0.934178	0.0479867	2019-20
51229	Gnowangerup	330.66	0.962666	0.16864	2019-20
51230	Katanning	469.134	0.974333	0.293113	2019-20
51231	Kojonup	536.386	0.901881	5.33333e-05	2019-20
51232	Little Grove - Elleker	525.48	1.00698	0.57706	2019-20
51233	McKail - Willyung	1145.22	1.02958	0.809913	2019-20
51234	Plantagenet	804.985	1.02415	0.713253	2019-20
51236	Chittering	844.82	1.02878	0.756687	2019-20
51237	Cunderdin	459.344	1.02817	0.71118	2019-20
51238	Dowerin	458.831	0.97066	0.227673	2019-20
51239	Gingin - Dandaragan	1298.88	1.00578	0.559133	2019-20
51240	Merredin	535.653	1.0422	0.875107	2019-20
51241	Moora	540.22	0.904305	0.13334	2019-20
51242	Mukinbudin	355.665	0.849145	0.02606	2019-20
51243	Northam	1171.52	0.899772	0.00478	2019-20
51244	Toodyay	718.541	0.967225	0.354773	2019-20
51245	York - Beverley	849.207	0.995323	0.480607	2019-20
51246	Brookton	481.249	0.997278	0.48666	2019-20
51247	Kulin	501.063	1.03617	0.870987	2019-20
51248	Murray	299.512	1.01435	0.657433	2019-20
51249	Narrogin	538.504	1.16397	0.99864	2019-20
51250	Wagin	599.986	1.11796	0.997393	2019-20
51251	Dalyellup	714.685	1.1412	0.999993	2019-20
51252	Gelorup - Stratham	3	1.14601	1	2019-20
51253	South Bunbury - Bunbury	3	1.18183	1	2019-20
51254	Withers - Usher	475.028	1.16423	1	2019-20
51255	Alkimos - Eglinton	3	0.988043	0.336547	2019-20
51256	Carabooda - Pinjar	3	1.16652	1	2019-20
51257	Two Rocks	3	1.18663	1	2019-20
51258	Yanchep	885.405	0.927438	0.0214467	2019-20
51259	Beeliar - Wattleup	695.379	0.845297	0	2019-20
51260	Jandakot	389.652	1.12999	1	2019-20
51261	Casuarina - Wandi	495.749	1.06405	0.999073	2019-20
51262	Broome	678.497	0.605774	0	2019-20
51263	Derby - West Kimberley	194.965	0.423764	0	2019-20
51264	Halls Creek	62.2283	0.383032	0	2019-20
51265	Kununurra	301	0.597421	0	2019-20
51266	Roebuck	3	0.519908	0	2019-20
51267	East Pilbara	3	0.55163	0	2019-20
51268	Newman	135.257	0.648445	0	2019-20
51269	Port Hedland	135.071	0.586707	0	2019-20
51270	South Hedland	298.291	0.464564	0	2019-20
51271	Ashburton (WA)	232.501	0.7379	0	2019-20
51272	Karratha	580.92	0.713121	0	2019-20
51273	Roebourne	151.77	0.600672	0	2019-20
51274	Esperance	1766.48	1.13773	1	2019-20
51275	Esperance Region	276.64	0.965708	0.255653	2019-20
51276	Carnarvon	371.723	0.705938	0	2019-20
51277	Exmouth	338.638	0.958205	0.192833	2019-20
51278	Boulder	447.185	0.653325	0	2019-20
51279	Kalgoorlie	1111.92	0.796323	0	2019-20
51280	Kalgoorlie - North	498.991	0.779553	0	2019-20
51281	Kalgoorlie Airport	3	0.708185	0.00493333	2019-20
51282	Kambalda - Coolgardie - Norseman	318.116	0.720853	0	2019-20
51283	Leinster - Leonora	103.419	0.612068	0	2019-20
51285	Geraldton	1933.18	0.934734	0.00104667	2019-20
51286	Geraldton - East	638.961	0.875828	0.000193333	2019-20
51287	Geraldton - North	645.005	0.977237	0.2701	2019-20
51288	Geraldton - South	963.908	1.08799	0.99572	2019-20
51289	Irwin	642.911	1.19632	0.999993	2019-20
51290	Meekatharra	163.987	0.684283	0	2019-20
51291	Morawa	451.511	0.962707	0.1869	2019-20
51292	Northampton - Mullewa - Greenough	704.995	1.04032	0.8723	2019-20
61001	Bridgewater - Gagebrook	548.956	0.7801	0	2019-20
61002	Brighton - Pontville	564.695	1.07601	0.966527	2019-20
61003	Old Beach - Otago	609.365	1.19579	1	2019-20
61004	Bellerive - Rosny	914.599	1.224	1	2019-20
61005	Cambridge	1183.85	1.22178	1	2019-20
61006	Geilston Bay - Risdon	466.597	1.23489	1	2019-20
61007	Howrah - Tranmere	1708.56	1.23604	1	2019-20
61008	Lindisfarne - Rose Bay	1046.2	1.20425	1	2019-20
61009	Mornington - Warrane	400.595	0.896601	0.00803333	2019-20
61010	Risdon Vale	195.563	0.88118	0.01514	2019-20
61011	Rokeby	537.599	0.91375	0.0144933	2019-20
61012	South Arm	661.781	1.13089	0.999153	2019-20
61013	Austins Ferry - Granton	468.264	1.07291	0.940627	2019-20
61014	Berriedale - Chigwell	535.82	0.941148	0.0653333	2019-20
61015	Claremont (Tas.)	736.662	0.916885	0.00673333	2019-20
61016	Derwent Park - Lutana	372.912	0.893303	0.00844667	2019-20
61017	Glenorchy	1075.19	0.903768	0.000153333	2019-20
61018	Montrose - Rosetta	542.224	1.04047	0.829367	2019-20
61019	Moonah	589.861	0.959747	0.13954	2019-20
61020	New Norfolk	920.735	0.941215	0.0256267	2019-20
61021	West Moonah	380.929	0.977765	0.317427	2019-20
61022	Kingston - Huntingfield	1546.45	1.198	1	2019-20
61023	Kingston Beach - Blackmans Bay	1578.58	1.22952	1	2019-20
61024	Margate - Snug	1072.86	1.21497	1	2019-20
61026	Taroona - Bonnet Hill	603.56	1.3038	1	2019-20
61027	Hobart	1359.73	1.04687	0.959367	2019-20
61028	Lenah Valley - Mount Stuart	1028.18	1.15085	1	2019-20
61029	Mount Nelson - Dynnyrne	588.714	1.25906	1	2019-20
61030	New Town	719.755	1.07589	0.97958	2019-20
61031	Sandy Bay	1613.43	1.19346	1	2019-20
61032	South Hobart - Fern Tree	719.742	1.18925	1	2019-20
61033	West Hobart	726.198	1.13665	0.99972	2019-20
61034	Dodges Ferry - Lewisham	1098.52	1.10236	0.99956	2019-20
61035	Sorell - Richmond	1216.25	1.04239	0.93384	2019-20
61036	Invermay	353.109	0.89853	0.0168733	2019-20
61037	Kings Meadows - Punchbowl	380.326	1.02274	0.687073	2019-20
61038	Launceston	1382.15	1.13925	1	2019-20
61039	Legana	552.161	1.13162	0.998333	2019-20
[truncated: 248 more rows]

## Sheet: 2017-18
SA2	SA2name	Count	SPR	PP	period
11007	Braidwood	496.004	1.03263	0.788193	2017-18
11008	Karabar	682.096	0.852538	6.66667e-06	2017-18
11009	Queanbeyan	873.151	0.926387	0.00786667	2017-18
11010	Queanbeyan - East	318.683	0.986628	0.39044	2017-18
11011	Queanbeyan Region	1682.85	1.09013	0.99992	2017-18
11012	Queanbeyan West - Jerrabomberra	1041.88	1.09318	0.998633	2017-18
11013	Bombala	332.857	1.06361	0.900213	2017-18
11014	Cooma	787.746	0.978913	0.2722	2017-18
11015	Cooma Region	330.982	1.03214	0.763993	2017-18
11016	Jindabyne - Berridale	623.339	0.968705	0.1967	2017-18
11017	Batemans Bay	1187.45	1.02103	0.767053	2017-18
11018	Batemans Bay - South	1094.65	1.01753	0.72224	2017-18
11019	Bega - Tathra	1303.9	1.16895	1	2017-18
11020	Bega-Eden Hinterland	1291.97	1.09277	0.99958	2017-18
11021	Broulee - Tomakin	425.589	1.10972	0.988353	2017-18
11022	Deua - Wadbilliga	3	1.03779	0.665293	2017-18
11023	Eden	494.998	1.07535	0.95264	2017-18
11024	Eurobodalla Hinterland	419.922	1.01706	0.660947	2017-18
11025	Merimbula - Tura Beach	1785.35	1.17969	1	2017-18
11026	Moruya - Tuross Head	1280.51	1.06131	0.984073	2017-18
11027	Narooma - Bermagui	1549.6	1.09477	0.999827	2017-18
11028	Avoca Beach - Copacabana	791.857	0.974022	0.213093	2017-18
11029	Box Head - MacMasters Beach	1298.82	0.993283	0.42508	2017-18
11030	Calga - Kulnura	453.566	0.956407	0.07116	2017-18
11031	Erina - Green Point	1528.27	0.95815	0.104107	2017-18
11032	Gosford - Springfield	1280.2	0.955291	0.09648	2017-18
11033	Kariong	508.26	1.01048	0.659913	2017-18
11034	Kincumber - Picketts Valley	834.376	0.926257	3.33333e-05	2017-18
11035	Narara	706.145	1.03639	0.891533	2017-18
11036	Niagara Park - Lisarow	816.192	0.955091	0.0319333	2017-18
11037	Point Clare - Koolewong	678.558	0.859035	0	2017-18
11038	Saratoga - Davistown	670.446	0.908927	0	2017-18
11039	Terrigal - North Avoca	1446.17	0.866696	6.66667e-06	2017-18
11040	Umina - Booker Bay - Patonga	2455.1	0.922511	0.00502	2017-18
11041	Wamberal - Forresters Beach	1108.18	0.970532	0.108787	2017-18
11042	Woy Woy - Blackwall	1476.88	0.874575	0	2017-18
11043	Wyoming	968.358	0.951686	0.15804	2017-18
11044	Bateau Bay - Killarney Vale	2075.5	0.965831	0.10246	2017-18
11045	Blue Haven - San Remo	801.677	0.935046	0.0452733	2017-18
11046	Budgewoi - Buff Point - Halekulani	935.912	0.959282	0.127167	2017-18
11047	Chittaway Bay - Tumbi Umbi	1606.25	0.91431	0.00044	2017-18
11048	Gorokan - Kanwal - Charmhaven	1922.8	0.881761	4e-05	2017-18
11049	Jilliby - Yarramalong	313.998	0.903059	0.00528667	2017-18
11050	Lake Munmorah - Mannering Park	1242.33	0.893004	6.66667e-05	2017-18
11051	Ourimbah - Fountaindale	494.293	0.811898	0	2017-18
11052	Summerland Point - Gwandalan	677.386	0.971475	0.0845067	2017-18
11053	The Entrance	1216.88	1.00012	0.501387	2017-18
11054	Toukley - Norah Head	932.803	1.0054	0.557913	2017-18
11055	Tuggerah - Kangy Angy	446.82	0.92091	0.0215867	2017-18
11056	Warnervale - Wadalba	1011.36	0.801321	0	2017-18
11057	Wyong	693.02	0.915621	0.00161333	2017-18
11058	Bathurst	2215.74	0.900065	0.00364667	2017-18
11059	Bathurst - East	826.923	0.906809	0.000766667	2017-18
11060	Bathurst Region	696.451	0.937396	0.04854	2017-18
11061	Oberon	497.1	0.897214	0.00068	2017-18
11062	Condobolin	543.052	0.907041	0.00490667	2017-18
11063	Cowra	993.998	0.876035	0.000933333	2017-18
11064	Cowra Region	572.808	0.874997	0	2017-18
11065	Forbes	922.391	0.974183	0.201067	2017-18
11066	Grenfell	427.893	0.920359	0.00230667	2017-18
11067	Parkes (NSW)	735.813	0.999197	0.49266	2017-18
11068	Parkes Region	536.199	0.920403	0.00291333	2017-18
11069	West Wyalong	507.823	0.923405	0.01046	2017-18
11070	Lithgow	1180.98	0.89979	0	2017-18
11071	Lithgow Region	866.826	0.982963	0.23784	2017-18
11072	Mudgee	1049.69	1.01618	0.702207	2017-18
11073	Mudgee Region - East	454.264	0.966533	0.0578333	2017-18
11074	Mudgee Region - West	957.179	0.972812	0.111607	2017-18
11076	Blayney	682.697	0.982792	0.202207	2017-18
11077	Orange	1718.62	0.957767	0.121307	2017-18
11078	Orange - North	1596.9	0.99856	0.474787	2017-18
11079	Orange Region	1098.73	0.946858	0.0289467	2017-18
11080	Grafton	1983.43	0.964391	0.216287	2017-18
11081	Grafton Region	1793.32	0.91293	0.0113	2017-18
11082	Maclean - Yamba - Iluka	2231.45	1.08609	0.997533	2017-18
11083	Bellingen	688.304	1.02277	0.86478	2017-18
11084	Coffs Harbour - North	1963.52	0.94887	0.0868933	2017-18
11085	Coffs Harbour - South	970.5	1.01624	0.73184	2017-18
11086	Coramba - Nana Glen - Bucca	442.303	0.686807	0	2017-18
11087	Dorrigo	425	0.822101	3.33333e-05	2017-18
11088	Korora - Emerald Beach	1132.98	0.725942	0	2017-18
11089	Sawtell - Boambee	2280.02	0.818335	0	2017-18
11090	Urunga	594.019	0.655787	0	2017-18
11091	Woolgoolga - Arrawarra	1417.64	0.85699	0	2017-18
11092	Bourke - Brewarrina	228	0.813719	6.66667e-06	2017-18
11093	Cobar	300.546	0.896398	0.000346667	2017-18
11094	Coonamble	304.581	0.837344	0	2017-18
11095	Nyngan - Warren	443.933	0.85267	0	2017-18
11096	Walgett - Lightning Ridge	483.287	0.860077	4e-05	2017-18
11097	Broken Hill	1535.57	0.919251	0.0365933	2017-18
11098	Far West	331.885	0.891611	0.0025	2017-18
11099	Coonabarabran	833.404	0.811171	0	2017-18
11100	Dubbo - East	689.104	0.802626	0	2017-18
11101	Dubbo - South	1541.35	1.00749	0.592173	2017-18
11102	Dubbo - West	553.539	0.83037	0	2017-18
11103	Dubbo Region	416.936	0.934407	0.0138733	2017-18
11104	Gilgandra	410.285	1.01048	0.634947	2017-18
11105	Narromine	544.053	0.907789	4.66667e-05	2017-18
11106	Wellington	703.277	0.916205	0.0007	2017-18
11107	Branxton - Greta - Pokolbin	925.567	0.950117	0.11124	2017-18
11108	Cessnock	1648	0.93237	0.0425533	2017-18
11109	Cessnock Region	804.677	0.990687	0.31014	2017-18
11110	Dungog	1000.11	1.05277	0.938593	2017-18
11111	Kurri Kurri - Abermain	1516.04	0.937747	0.00335333	2017-18
11112	Singleton	1249.34	1.03257	0.834827	2017-18
11113	Singleton Region	425.095	1.05459	0.94192	2017-18
11114	Maitland	516.704	1.05015	0.938053	2017-18
11115	Maitland - East	2443.67	1.07528	0.999933	2017-18
11116	Maitland - North	732.938	0.904591	9.33333e-05	2017-18
11117	Maitland - West	1645.03	1.13034	0.99962	2017-18
11118	Thornton - Millers Forest	892.304	1.19588	1	2017-18
11119	Anna Bay	694.896	0.976794	0.193647	2017-18
11120	Lemon Tree Passage - Tanilba Bay	894.585	0.863905	6.66667e-06	2017-18
11121	Nelson Bay Peninsula	2908.03	0.893686	0.01514	2017-18
11122	Raymond Terrace	1212.96	0.936903	0.0514067	2017-18
11123	Seaham - Woodville	629.539	0.918071	0.00617333	2017-18
11124	Tea Gardens - Hawks Nest	1025.73	0.950032	0.00744667	2017-18
11125	Williamtown - Medowie - Karuah	1291.19	0.953617	0.08544	2017-18
11126	Muswellbrook	861.706	0.96948	0.4147	2017-18
11127	Muswellbrook Region	311.041	0.96999	0.112667	2017-18
11128	Scone	528.057	0.92946	0.358153	2017-18
11129	Scone Region	702.567	1.0067	0.60086	2017-18
11131	Dapto - Avondale	2192.84	0.889532	0.00112667	2017-18
11132	Horsley - Kembla Grange	644.163	1.06667	0.984147	2017-18
11133	Port Kembla Industrial	3	1.04585	0.8999	2017-18
11134	Unanderra - Mount Kembla	1498.18	1.06976	0.985727	2017-18
11135	Illawarra Catchment Reserve	3	0.936705	0.00096	2017-18
11136	Albion Park - Macquarie Pass	1215.92	0.910899	0.000233333	2017-18
11137	Albion Park Rail	563.099	0.993977	0.392213	2017-18
11138	Kiama	1030.49	1.05311	0.934087	2017-18
11139	Kiama Downs - Minnamurra	720.221	1.11884	0.999987	2017-18
11140	Kiama Hinterland - Gerringong	946.059	1.05894	0.995	2017-18
11141	Shellharbour - Flinders	1547.15	0.968394	0.19702	2017-18
11142	Shellharbour - Oak Flats	1069.27	1.10194	0.999987	2017-18
11143	Warilla	1960.41	1.02304	0.762107	2017-18
11144	Balgownie - Fairy Meadow	1854.14	1.06031	0.9648	2017-18
11145	Corrimal - Tarrawanna - Bellambi	1307.31	0.82914	0	2017-18
11146	Figtree - Keiraville	1987.67	0.948003	0.03316	2017-18
11147	Helensburgh	800.945	0.965786	0.17	2017-18
11148	Thirroul - Austinmer - Coalcliff	1343.76	0.969196	0.16862	2017-18
11150	Woonona - Bulli - Russell Vale	1924.9	1.00879	0.613967	2017-18
11151	Bulahdelah - Stroud	565.323	1.00876	0.699533	2017-18
11152	Forster	2176.73	0.911237	6.66667e-05	2017-18
11153	Forster-Tuncurry Region	940.062	0.940922	0.0515933	2017-18
11154	Tuncurry	856.062	0.954617	0.0489867	2017-18
11155	Kempsey	1383.25	1.07506	0.97666	2017-18
11156	Kempsey Region	1082.34	1.11939	1	2017-18
11157	Macksville - Scotts Head	642.445	0.982673	0.19978	2017-18
11158	Nambucca Heads	848.9	1.06476	0.997727	2017-18
11159	Nambucca Heads Region	1018.65	1.02043	0.71022	2017-18
11160	South West Rocks	864.011	1.13751	1	2017-18
11162	Laurieton - Bonny Hills	2457.99	1.03727	0.86786	2017-18
11163	Port Macquarie - East	3500.03	1.15319	1	2017-18
11164	Port Macquarie - West	1500.73	1.0367	0.904007	2017-18
11165	Port Macquarie Region	587.571	1.00753	0.622493	2017-18
11166	Wauchope	1189.41	0.89387	0.0137267	2017-18
11167	Gloucester	747.358	0.985252	0.36556	2017-18
11168	Old Bar - Manning Point - Red Head	1675.4	1.01244	0.614487	2017-18
11169	Taree	2235.36	1.09132	0.99306	2017-18
11170	Taree Region	2002	1.06862	0.98518	2017-18
11171	Wingham	643.734	0.939347	0.0690867	2017-18
11172	Albury - East	1357.97	1.09987	0.999207	2017-18
11173	Albury - North	856.647	1.13736	0.999927	2017-18
11174	Albury - South	1415.89	1.05333	0.969847	2017-18
11175	Albury Region	1278.03	1.03789	0.965693	2017-18
11176	Lavington	1555.79	1.04557	0.850553	2017-18
11177	Hay	286.936	1.01393	0.648513	2017-18
11178	Wentworth - Buronga	415.635	0.999732	0.4975	2017-18
11179	Wentworth-Balranald Region	484.856	0.914475	0.000893333	2017-18
11180	Corowa	739.838	0.90598	0.000293333	2017-18
11181	Corowa Region	901.729	0.955403	0.109213	2017-18
11182	Deniliquin	506.04	0.911798	0.00901333	2017-18
11183	Deniliquin Region	1030.02	0.867311	6.66667e-06	2017-18
11184	Moama	820.087	0.734484	0	2017-18
11185	Tocumwal - Finley - Jerilderie	1212	0.764255	0	2017-18
11186	Armidale	2193.1	0.825649	2e-05	2017-18
11187	Armidale Region - North	486.603	0.835695	0	2017-18
11188	Armidale Region - South	684.875	0.858606	0	2017-18
11189	Walcha	374.792	0.922593	0.0305933	2017-18
11190	Glen Innes	964.293	0.913117	0.00330667	2017-18
11191	Inverell	1125.87	0.934776	0.00214667	2017-18
11192	Inverell Region - East	525.833	0.937186	0.00361333	2017-18
11193	Inverell Region - West	618.665	0.776934	0	2017-18
11194	Tenterfield	733.615	0.969305	0.07452	2017-18
11195	Moree	586.722	1.06661	0.9979	2017-18
11196	Moree Region	316.963	1.03692	0.853453	2017-18
11197	Narrabri	419.152	1.01489	0.758167	2017-18
11198	Narrabri Region	564.9	0.993199	0.36882	2017-18
11199	Gunnedah	776.709	0.806911	0	2017-18
11200	Gunnedah Region	358.127	1.01374	0.6203	2017-18
11201	Quirindi	773.696	1.13371	1	2017-18
11202	Tamworth - East	1710.45	1.16059	1	2017-18
11203	Tamworth - North	1448.84	1.0534	0.980793	2017-18
11204	Tamworth - West	335.478	0.933986	0.01716	2017-18
11205	Tamworth Region	1915.76	1.01132	0.653727	2017-18
11206	Belmont - Bennetts Green	2011.79	0.973366	0.179373	2017-18
11207	Belmont South - Blacksmiths	679.343	0.925083	0.000886667	2017-18
11208	Charlestown - Dudley	2239.29	1.0836	0.999693	2017-18
11209	Glendale - Cardiff - Hillsborough	2202.83	1.08935	0.99942	2017-18
11210	Mount Hutton - Windale	682.042	0.995811	0.453433	2017-18
11211	Redhead	398.555	1.0264	0.836273	2017-18
11212	Swansea - Caves Beach	1590.2	0.869335	4.66667e-05	2017-18
11213	Valentine - Eleebana	1678.14	0.953088	0.0500067	2017-18
11214	Warners Bay - Boolaroo	1575.05	1.04345	0.958693	2017-18
11215	Bolton Point - Teralba	866.148	0.970937	0.16026	2017-18
11216	Bonnells Bay - Silverwater	1010.49	0.877003	0	2017-18
11217	Edgeworth - Cameron Park	1022.09	1.18158	1	2017-18
11218	Morisset - Cooranbong	1593.19	1.0454	0.94018	2017-18
11219	Toronto - Awaba	1704.39	0.996418	0.48608	2017-18
11220	Wangi Wangi - Rathmines	1277.07	0.922678	0.0196733	2017-18
11221	West Wallsend - Barnsley - Killingworth	668.087	1.15316	1	2017-18
11222	Adamstown - Kotara	1375.6	1.00477	0.581787	2017-18
11223	Beresfield - Hexham	705.453	0.93236	0.0135867	2017-18
11224	Hamilton - Broadmeadow	1099.22	0.961975	0.128593	2017-18
11225	Lambton - New Lambton	1608.98	1.01252	0.718533	2017-18
11226	Maryland - Fletcher - Minmi	1019.8	1.03331	0.935947	2017-18
11227	Mayfield - Warabrook	1104.59	0.929179	0.01908	2017-18
11228	Merewether - The Junction	1593.59	0.949095	0.0473067	2017-18
11229	Newcastle - Cooks Hill	1064.44	0.875134	0	2017-18
11230	Newcastle Port - Kooragang	3	0.921686	0.0190533	2017-18
11231	Shortland - Jesmond	591.433	1.08208	0.994453	2017-18
11232	Stockton - Fullerton Cove	1126.57	0.832444	0	2017-18
11233	Wallsend - Elermore Vale	1828.27	0.950618	0.0277333	2017-18
11234	Waratah - North Lambton	871.547	0.906414	0.00248667	2017-18
11235	Wickham - Carrington - Tighes Hill	697.48	0.977896	0.210407	2017-18
11236	Ballina	2059.49	0.932548	0.0159533	2017-18
11237	Ballina Region	2052.23	0.87029	0	2017-18
11238	Bangalow	656.299	0.960798	0.0409467	2017-18
11239	Brunswick Heads - Ocean Shores	902.501	0.938618	0.00721333	2017-18
11240	Byron Bay	1014.11	0.819699	0	2017-18
11241	Evans Head	561.064	0.966914	0.117593	2017-18
11242	Lennox Head - Skennars Head	941.549	1.0073	0.611093	2017-18
11243	Mullumbimby	877.336	0.929508	0.000293333	2017-18
11244	Casino	1306.9	0.872804	0	2017-18
11245	Casino Region	703.007	0.867078	0	2017-18
11246	Goonellabah	1202.39	0.869282	1.33333e-05	2017-18
11247	Kyogle	877.945	0.909466	0.00448667	2017-18
11248	Lismore	1482.49	1.0007	0.505607	2017-18
11249	Lismore Region	1785.61	1.00797	0.594407	2017-18
11250	Kingscliff - Fingal Head	1385.94	0.937653	0.07098	2017-18
11251	Murwillumbah	865.412	0.994794	0.436327	2017-18
11252	Murwillumbah Region	1138.65	0.878557	0.00112667	2017-18
11253	Pottsville	1460.93	0.901651	0.00578667	2017-18
11254	Tweed Heads	2119.63	0.956452	0.100007	2017-18
11256	Griffith (NSW)	1533.94	0.916779	0.00140667	2017-18
11257	Griffith Region	938.767	0.927851	0.00213333	2017-18
11258	Leeton	809.624	1.0534	0.969813	2017-18
11259	Narrandera	577.894	1.12004	0.998433	2017-18
11260	Tumbarumba	364.563	1.06067	0.953087	2017-18
11261	Tumut	731.086	1.0276	0.554107	2017-18
11262	Tumut Region	418.884	1.13134	0.99974	2017-18
11263	Cootamundra	904.815	0.991666	0.356753	2017-18
11264	Gundagai	306.178	0.890757	0	2017-18
11265	Junee	494.775	1.02013	0.80292	2017-18
11266	Temora	684.808	1.01977	0.710087	2017-18
11267	Wagga Wagga - East	1472.73	1.01873	0.658927	2017-18
11268	Wagga Wagga - North	228.805	1.07276	0.999567	2017-18
11269	Wagga Wagga - South	1482.34	1.07817	0.986413	2017-18
11270	Wagga Wagga - West	1146.24	1.00479	0.583067	2017-18
11271	Wagga Wagga Region	1220.22	0.92445	0.0142867	2017-18
11272	Berry - Kangaroo Valley	1269.94	0.953148	0.0482533	2017-18
11273	Callala Bay - Currarong	555.841	0.956626	0.06714	2017-18
11274	Culburra Beach	687.627	0.960895	0.18602	2017-18
11275	Ettrema - Sassafras - Budawang	3	1.0424	0.90698	2017-18
11276	Huskisson - Vincentia	707.381	1.00193	0.53352	2017-18
11277	North Nowra - Bomaderry	1821.94	0.984105	0.214673	2017-18
11278	Nowra	1600.41	1.0398	0.859553	2017-18
11279	St Georges Basin - Erowal Bay	1759.54	0.989793	0.334373	2017-18
11280	Sussex Inlet - Berrara	675.898	0.920988	3.33333e-05	2017-18
11281	Tomerong - Wandandian - Woollamia	406.681	0.959651	0.129	2017-18
11282	Ulladulla	2223.52	0.983986	0.385007	2017-18
11283	Ulladulla Region	817.243	0.980697	0.172847	2017-18
11284	Bowral	1840.14	0.918073	0.00332667	2017-18
11285	Hill Top - Colo Vale	498.629	0.905802	1.33333e-05	2017-18
11286	Mittagong	1040.85	0.799703	0	2017-18
11287	Moss Vale - Berrima	1047.85	0.768183	0	2017-18
11288	Robertson - Fitzroy Falls	401.859	0.785376	0	2017-18
11289	Southern Highlands	872.378	0.848502	0	2017-18
11290	Baulkham Hills (East)	1844.67	0.865023	0	2017-18
11291	Baulkham Hills (West) - Bella Vista	2311.89	0.843692	0	2017-18
11294	Glenhaven	671.779	0.825121	0	2017-18
11296	West Pennant Hills	1667.58	0.833977	0	2017-18
11297	Dural - Kenthurst - Wisemans Ferry	2135.44	0.840288	0.00258667	2017-18
11298	Galston - Laughtondale	545.995	0.809767	0	2017-18
11299	Bilpin - Colo - St Albans	300.531	0.805327	0	2017-18
11300	Kurrajong Heights - Ebenezer	2207.94	0.802147	0	2017-18
11301	Pitt Town - McGraths Hill	887.31	0.818975	0.01856	2017-18
11302	Rouse Hill - Beaumont Hills	1626.94	0.902822	0.06958	2017-18
11303	Blacktown (East) - Kings Park	819.54	0.869449	0	2017-18
11304	Blacktown (North) - Marayong	1221.86	0.881156	0	2017-18
11306	Doonside - Woodcroft	1533.35	0.900199	0.00276667	2017-18
11307	Lalor Park - Kings Langley	1934.07	0.838228	0	2017-18
11308	Seven Hills - Toongabbie	1855.41	0.952815	0.05334	2017-18
11309	Glenwood	1033.52	0.840467	0	2017-18
11310	Parklea - Kellyville Ridge	1482.31	0.88024	0	2017-18
11312	Riverstone - Marsden Park	1113.27	0.790769	0	2017-18
11313	Bidwill - Hebersham - Emerton	1011.63	0.734587	0	2017-18
11314	Glendenning - Dean Park	438.892	0.816805	0	2017-18
11315	Hassall Grove - Plumpton	1184.24	0.763594	0	2017-18
11316	Lethbridge Park - Tregear	936.911	0.823861	0	2017-18
11317	Mount Druitt - Whalan	1007.85	0.755469	0	2017-18
11318	Prospect Reservoir	3	0.761365	0	2017-18
11319	Rooty Hill - Minchinbury	1432.56	0.860744	0	2017-18
11320	Banksmeadow	3	0.727654	0	2017-18
11321	Botany	699.667	0.778314	0	2017-18
11322	Mascot - Eastlakes	1369.52	0.91238	3.33333e-05	2017-18
11323	Pagewood - Hillsdale - Daceyville	733.663	0.87132	0	2017-18
11324	Port Botany Industrial	3	0.831657	0	2017-18
11325	Sydney Airport	76.8468	0.862852	0.02728	2017-18
11326	Marrickville	1930.52	0.768491	0	2017-18
11327	Petersham - Stanmore	1372.31	0.688725	0	2017-18
11328	Sydenham - Tempe - St Peters	567.966	0.914529	0.0001	2017-18
11329	Darlinghurst	663.336	0.954444	0.0113267	2017-18
11330	Erskineville - Alexandria	953.687	0.913212	0.00022	2017-18
11331	Glebe - Forest Lodge	1263.46	0.876797	0	2017-18
11332	Newtown - Camperdown - Darlington	1430.54	0.756302	0	2017-18
11333	Potts Point - Woolloomooloo	1377.34	0.779757	0	2017-18
11334	Pyrmont - Ultimo	1094.93	0.851091	0	2017-18
11335	Redfern - Chippendale	1081.07	0.746441	0	2017-18
11336	Surry Hills	1047.94	0.772784	0	2017-18
11337	Sydney - Haymarket - The Rocks	1458.81	0.856371	0	2017-18
11338	Waterloo - Beaconsfield	1278.81	0.957148	0.0218133	2017-18
11339	Bondi - Tamarama - Bronte	1043.05	0.925775	0.00244667	2017-18
11340	Bondi Beach - North Bondi	993.935	0.999875	0.498173	2017-18
11341	Bondi Junction - Waverly	1274.29	0.910188	6.66667e-06	2017-18
11343	Double Bay - Bellevue Hill	1853.95	0.843175	0	2017-18
11344	Dover Heights	635.631	0.87478	0	2017-18
11345	Paddington - Moore Park	1056.6	0.757991	0	2017-18
11346	Rose Bay - Vaucluse - Watsons Bay	973.97	0.850655	0	2017-18
11347	Woollahra	622.797	0.865659	0	2017-18
11348	Coogee - Clovelly	1817.71	0.867472	6.66667e-06	2017-18
11350	Malabar - La Perouse - Chifley	2077.86	0.842237	0	2017-18
11354	Bass Hill - Georges Hall	1617.29	0.964499	0.0663467	2017-18
11355	Chullora	54.9023	0.929857	0.00032	2017-18
11356	Condell Park	844.262	0.940375	0.01066	2017-18
11357	Greenacre - Mount Lewis	1453.57	0.831463	0	2017-18
11358	Padstow	1504.27	0.86137	0	2017-18
11359	Panania - Milperra - Picnic Point	2270.63	0.904818	0.000633333	2017-18
11360	Revesby	1322.17	0.872574	0	2017-18
11361	Yagoona - Birrong	1548.55	0.907737	0.000133333	2017-18
11362	Belmore - Belfield	1319.51	0.8778	0	2017-18
11363	Canterbury (South) - Campsie	1981.68	0.931315	0.00202	2017-18
11364	Kingsgrove (North) - Earlwood	2045.02	0.986799	0.2382	2017-18
11366	Punchbowl	1232.38	0.998461	0.481107	2017-18
11367	Roselands	962.753	1.03143	0.94864	2017-18
11368	Hurstville	1773.8	1.02166	0.8286	2017-18
11369	Mortdale - Penshurst	1980.28	0.977086	0.130573	2017-18
11370	Narwee - Beverly Hills	1199.42	1.01869	0.823207	2017-18
11371	Oatley - Hurstville Grove	1406.45	1.00453	0.57312	2017-18
11372	Peakhurst - Lugarno	1807.87	0.937155	0.00158667	2017-18
11373	Riverwood	752.236	1.04087	0.966513	2017-18
11374	South Hurstville - Blakehurst	1872.27	1.0109	0.682647	2017-18
11375	Arncliffe - Bardwell Valley	1033.7	1.00498	0.58808	2017-18
11376	Bexley	1863.79	1.01277	0.6887	2017-18
11377	Kingsgrove (South) - Bardwell Park	1127.41	0.949306	0.00214667	2017-18
11378	Kogarah	711.794	0.93665	0.00365333	2017-18
11379	Kogarah Bay - Carlton - Allawah	1237.12	0.966977	0.132053	2017-18
11380	Monterey - Brighton-le-Sands - Kyeemagh	1055.68	1.0797	0.999893	2017-18
11381	Rockdale - Banksia	1173.08	1.08047	0.999827	2017-18
11382	Sans Souci - Ramsgate	1423.28	1.0281	0.87522	2017-18
11383	Concord - Mortlake - Cabarita	2024.92	1.03497	0.906873	2017-18
11384	Concord West - North Strathfield	1440.06	1.05993	0.993507	2017-18
11385	Drummoyne - Rodd Point	1685.2	1.01304	0.751113	2017-18
11386	Five Dock - Abbotsford	1612.4	0.963154	0.0697067	2017-18
11387	Balmain	1560.53	1.00969	0.614607	2017-18
11388	Leichhardt - Annandale	2002.64	0.940106	0.00418	2017-18
11389	Lilyfield - Rozelle	1211.1	1.04976	0.9601	2017-18
11390	Ashfield	1560.21	1.08902	1	2017-18
11391	Burwood - Croydon	1750.66	1.03476	0.924447	2017-18
11392	Canterbury (North) - Ashbury	890.181	1.04278	0.952467	2017-18
11393	Croydon Park - Enfield	1460.78	1.01681	0.787473	2017-18
11394	Dulwich Hill - Lewisham	1282.31	0.933197	0.0521867	2017-18
11395	Haberfield - Summer Hill	1176.13	0.933802	0.00637333	2017-18
11396	Homebush	709.563	0.90267	6.66667e-06	2017-18
11398	Chatswood (East) - Artarmon	2003.83	0.82973	0	2017-18
11399	Chatswood (West) - Lane Cove North	1481.34	0.793684	0	2017-18
11400	Lane Cove - Greenwich	2670.41	0.836283	0	2017-18
11401	St Leonards - Naremburn	779.679	0.83766	0	2017-18
11402	Willoughby - Castle Cove - Northbridge	2677.01	0.761103	0	2017-18
11403	Asquith - Mount Colah	2000.38	0.79282	0	2017-18
11404	Berowra - Brooklyn - Cowan	1245.72	0.834917	0	2017-18
11406	Normanhurst - Thornleigh - Westleigh	1813.97	0.904981	0.00505333	2017-18
11407	Gordon - Killara	2205.08	0.89909	0.000946667	2017-18
11408	Lindfield - Roseville	2378.5	1.07473	0.99968	2017-18
11409	Pymble	1591.49	0.910202	0.18666	2017-18
11410	St Ives	1948.07	0.876303	0	2017-18
11411	Turramurra	2013.39	1.00913	0.6317	2017-18
11412	Wahroonga (East) - Warrawee	1841.11	1.01774	0.806633	2017-18
11413	Cremorne - Cammeray	1832.72	0.957971	0.101307	2017-18
11414	Crows Nest - Waverton	1351.85	0.870594	0.07078	2017-18
11415	Mosman	2872.67	0.817103	0	2017-18
11416	Neutral Bay - Kirribilli	1553.69	0.888637	0	2017-18
11417	North Sydney - Lavender Bay	981.745	0.901841	5.33333e-05	2017-18
11418	Balgowlah - Clontarf - Seaforth	2124.53	0.917229	0.00038	2017-18
11419	Manly - Fairlight	2060.35	0.882034	0	2017-18
11420	Avalon - Palm Beach	1677.13	0.795943	0	2017-18
11421	Bayview - Elanora Heights	1407.44	0.994362	0.436167	2017-18
11422	Newport - Bilgola	1742.26	0.782476	0	2017-18
11423	Warriewood - Mona Vale	2700.34	1.00968	0.58622	2017-18
11424	Beacon Hill - Narraweena	1425.32	0.884605	0	2017-18
11425	Cromer	898.649	0.778321	0	2017-18
11426	Dee Why - North Curl Curl	1647.54	0.934714	0.0391333	2017-18
11427	Forestville - Killarney Heights	1255.52	0.948785	0.0893933	2017-18
11428	Frenchs Forest - Belrose	2767.23	0.859924	0	2017-18
11429	Freshwater - Brookvale	1681.49	0.830887	0	2017-18
11430	Manly Vale - Allambie Heights	1490.77	0.875951	0.0618867	2017-18
11431	Narrabeen - Collaroy	2130.64	0.974752	0.0898867	2017-18
11432	Terrey Hills - Duffys Forest	381.074	0.852092	0	2017-18
11433	Camden - Ellis Lane	1202.49	0.915594	0.000193333	2017-18
11434	Elderslie - Harrington Park	1515.24	0.882667	0	2017-18
11435	Mount Annan - Currans Hill	1747.8	0.80203	0	2017-18
11436	Bradbury - Wedderburn	1263.38	0.738913	0	2017-18
11437	Campbelltown - Woodbine	1231.5	0.921653	2.66667e-05	2017-18
11438	Claymore - Eagle Vale - Raby	1374.2	0.714814	0	2017-18
11440	Ingleburn - Denham Court	1470.34	0.784449	0	2017-18
11441	Leumeah - Minto Heights	1394.18	0.77338	0	2017-18
11442	Macquarie Fields - Glenfield	1468.07	0.784199	0.00536	2017-18
11443	Minto - St Andrews	1348.47	0.783603	0.0099	2017-18
11444	Rosemeadow - Glen Alpine	1607.98	0.753966	0	2017-18
11445	Bargo	491.066	0.950256	0.0459733	2017-18
11446	Douglas Park - Appin	798.845	0.923285	0.00384	2017-18
11447	Picton - Tahmoor - Buxton	1502.65	0.628036	0	2017-18
11448	The Oaks - Oakdale	837.582	0.93339	0.00146	2017-18
11449	Blackheath - Megalong Valley	673.461	1.01254	0.66876	2017-18
11450	Blaxland - Warrimoo - Lapstone	2125.51	1.00311	0.56304	2017-18
11451	Blue Mountains - North	3	1.00929	0.669047	2017-18
11452	Katoomba - Leura	1480.35	0.998156	0.462107	2017-18
11453	Lawson - Hazelbrook - Linden	1232.22	0.916598	0.000686667	2017-18
11454	Springwood - Winmalee	2311.77	0.955728	0.0661333	2017-18
11455	Wentworth Falls	751.016	0.931093	0.00467333	2017-18
11456	Blue Mountains - South	3	0.937758	0.00472	2017-18
11457	Cambridge Park	1234.58	0.933617	0.00462	2017-18
11458	Castlereagh - Cranebrook	1462.34	0.704401	0	2017-18
11459	Emu Plains - Leonay	1318.69	0.811018	0	2017-18
11460	Glenmore Park - Regentville	1443.52	0.88456	6.66667e-06	2017-18
11461	Jamisontown - South Penrith	1398.16	0.910049	8e-05	2017-18
11462	Kingswood - Werrington	1052.38	0.874228	0	2017-18
11463	Mulgoa - Luddenham - Orchard Hills	747.379	0.98301	0.207167	2017-18
11464	Penrith	723.1	0.876025	0	2017-18
11465	Warragamba - Silverdale	463.485	1.01308	0.727813	2017-18
11466	Richmond - Clarendon	1071.93	0.897547	0.000226667	2017-18
11467	Windsor - Bligh Park	991.347	0.81351	0	2017-18
11468	Yarramundi - Londonderry	569.85	0.837544	0	2017-18
11469	Erskine Park	539.53	0.861927	1.33333e-05	2017-18
11470	St Clair	1572.1	0.851526	0.000153333	2017-18
11473	Homebush Bay - Silverwater	800.393	0.915572	0.10732	2017-18
11475	Rookwood Cemetery	3	0.786124	0	2017-18
11476	Carlingford	2666.85	0.932929	0.00565333	2017-18
11477	Ermington - Rydalmere	1597.95	0.955049	0.0169733	2017-18
11478	Oatlands - Dundas Valley	1469.78	1.00805	0.646553	2017-18
11479	Chester Hill - Sefton	1360.57	0.929177	0.196387	2017-18
11480	Fairfield - East	1102.66	0.899174	6.66667e-06	2017-18
11481	Granville - Clyde	1196.64	0.970954	0.0716867	2017-18
11482	Greystanes - Pemulwuy	2387.76	0.957881	0.0475867	2017-18
11483	Guildford - South Granville	1105.24	0.953956	0.0887333	2017-18
11484	Guildford West - Merrylands West	1201.97	0.999807	0.497133	2017-18
11485	Merrylands - Holroyd	1589.66	0.910935	0.000673333	2017-18
11486	Smithfield Industrial	40.0336	0.900571	0.000886667	2017-18
11487	Yennora Industrial	3	0.779857	0	2017-18
11489	North Parramatta	910.933	0.914969	0.15702	2017-18
11490	North Rocks	987.323	0.872042	0.0800267	2017-18
11491	Northmead	908.486	0.877695	0.06508	2017-18
11492	Parramatta - Rosehill	1128.36	0.92048	2.66667e-05	2017-18
11493	Toongabbie - Constitution Hill	1708.61	0.883186	0.0836667	2017-18
11494	Winston Hills	1118.05	0.850341	0.0477333	2017-18
11495	Epping - North Epping	2568.26	0.945326	0.277587	2017-18
11496	Pennant Hills - Cheltenham	2060.85	1.02713	0.925633	2017-18
11497	Eastwood - Denistone	2592.29	0.909344	0.121707	2017-18
11498	Gladesville - Huntleys Point	1277.76	0.989127	0.295233	2017-18
11499	Hunters Hill - Woolwich	954.935	0.956797	0.0128333	2017-18
11500	Macquarie Park - Marsfield	1197.95	0.931019	0.181353	2017-18
11501	North Ryde - East Ryde	1288.79	0.92015	0.167427	2017-18
11503	West Ryde - Meadowbank	1334.11	0.804403	0	2017-18
11504	Ashcroft - Busby - Miller	969.465	0.825319	0	2017-18
11505	Austral - Greendale	748.119	0.84311	0.00844	2017-18
11506	Cobbitty - Leppington	1183.96	0.842314	0	2017-18
11509	Bonnyrigg Heights - Bonnyrigg	1474.35	0.797535	0.00175333	2017-18
11510	Bossley Park - Abbotsbury	1796.19	0.694381	0	2017-18
11511	Cabramatta - Lansvale	2013.77	0.809889	0	2017-18
11512	Cabramatta West - Mount Pritchard	1496.38	0.806174	0.00640667	2017-18
11513	Canley Vale - Canley Heights	2102.13	0.83127	0.0149133	2017-18
11514	Edensor Park	915.392	0.936374	0.00084	2017-18
11515	Fairfield	1212.92	0.821227	0.01478	2017-18
11516	Fairfield - West	1723.79	0.783654	0.00905333	2017-18
11517	Greenfield Park - Prairiewood	775.297	0.715606	0	2017-18
11518	Horsley Park - Kemps Creek	387.477	0.765311	0	2017-18
11519	Smithfield - Wetherill Park	1495.56	0.796693	0.00341333	2017-18
11520	St Johns Park - Wakeley	1126.3	0.801532	0.00806667	2017-18
11521	Wetherill Park Industrial	59.735	0.781554	0.00530667	2017-18
11522	Casula	1162.68	0.818618	0.0083	2017-18
11523	Chipping Norton - Moorebank	1611.52	0.864068	0	2017-18
11524	Holsworthy - Wattle Grove	1268.98	0.813561	0	2017-18
11529	Gymea - Grays Point	1662.52	0.896392	0.136093	2017-18
11530	Miranda - Yowie Bay	1428.42	0.877425	0	2017-18
11531	Sylvania - Taren Point	1452.64	0.89538	0.122813	2017-18
11533	Heathcote - Waterfall	551.577	0.893391	0.160593	2017-18
11534	Illawong - Alfords Point	1184.98	0.966515	0.0419267	2017-18
11535	Menai - Lucas Heights - Woronora	1980.22	0.889224	0.0923333	2017-18
11536	Oyster Bay - Como - Jannali	2100.07	0.979105	0.11698	2017-18
11537	Royal National Park	3	0.887274	0.0862	2017-18
11538	Sutherland - Kirrawee	1352.65	0.913583	0.166473	2017-18
11539	Goulburn	2295.83	1.0266	0.77238	2017-18
11540	Goulburn Region	1287.46	0.9949	0.419707	2017-18
11541	Yass	648.43	0.793436	0	2017-18
11542	Yass Region	1097.79	0.967169	0.07788	2017-18
11543	Young	1002.25	0.8795	0	2017-18
11544	Young Region	772.342	0.902178	0.00319333	2017-18
11545	Berkeley - Lake Heights - Cringila	2064.01	1.06688	0.994833	2017-18
11546	Port Kembla - Warrawong	3	0.981451	0.262907	2017-18
11547	Windang - Primbee	3	0.921464	0.00016	2017-18
11548	Wollongong - East	3	1.1251	0.999853	2017-18
11549	Wollongong - West	2067.73	1.06398	0.999087	2017-18
11550	Banora Point	3	0.979268	0.20394	2017-18
11551	Terranora - North Tumblegum	3	1.00083	0.506187	2017-18
11552	Tweed Heads South	2897.2	0.914605	0.00018	2017-18
11553	Castle Hill - Central	3	0.610393	0	2017-18
11554	Castle Hill - East	3	0.750054	0	2017-18
11555	Castle Hill - North	2813.61	0.750051	0	2017-18
11556	Castle Hill - South	3	0.619749	0	2017-18
11557	Castle Hill - West	2347.31	0.670968	0	2017-18
11558	Cherrybrook	2458.23	0.854639	0.04938	2017-18
11559	Kellyville	3	0.799415	0	2017-18
11560	Blacktown (South)	3	0.868171	0	2017-18
11561	Blacktown (West)	1734.69	0.927133	0.00133333	2017-18
11562	Acacia Gardens	3	0.870782	0	2017-18
11563	Quakers Hill	1623.08	0.750975	0	2017-18
11564	Kensington (NSW)	1452.6	0.822633	0	2017-18
11565	Kingsford	3	0.735037	0	2017-18
11566	Maroubra - North	2278.8	0.841292	0	2017-18
11567	Maroubra - South	3	0.928866	0.00026	2017-18
11568	Maroubra - West	3	0.908882	6.66667e-05	2017-18
11569	Randwick - North	1809.61	0.942284	0.00604667	2017-18
11570	Randwick - South	3	0.911993	4.66667e-05	2017-18
11571	Bankstown - North	1851.31	0.941113	0.0135467	2017-18
11572	Bankstown - South	3	0.789041	0	2017-18
11573	Lakemba	3	1.00109	0.520193	2017-18
11574	Wiley Park	1147.07	1.0175	0.736407	2017-18
11575	Strathfield	1814.02	0.93539	0.00153333	2017-18
11576	Strathfield South	3	0.770341	0	2017-18
11577	Hornsby - East	3	1.01044	0.62514	2017-18
11578	Hornsby - West	2164.95	0.94586	0.0123667	2017-18
11579	Waitara - Wahroonga (West)	3	0.992311	0.40824	2017-18
11580	Colyton - Oxley Park	3	0.828783	0	2017-18
11581	St Marys - North St Marys	1614.12	0.915612	0.000593333	2017-18
11582	Auburn - Central	1892.64	0.840048	0	2017-18
11583	Auburn - North	3	0.882254	0	2017-18
11584	Auburn - South	3	0.953716	0.0217267	2017-18
11585	Berala	3	0.889242	0	2017-18
11586	Lidcombe	3	0.895604	6.66667e-06	2017-18
11587	Regents Park	2474.88	0.974492	0.24806	2017-18
11588	Pendle Hill - Girraween	1566.97	0.943846	0.00068	2017-18
11589	Wentworthville - Westmead	3	0.904012	0.127353	2017-18
11590	Putney	3	0.895627	0.22268	2017-18
11591	Ryde	2300.02	0.872403	0	2017-18
11592	Badgerys Creek	3	0.878837	0.191493	2017-18
11593	Cecil Hills	3	0.795375	0.0100667	2017-18
11594	Green Valley	2521.92	0.877732	0	2017-18
11595	Hinchinbrook	3	0.823982	0.0102467	2017-18
11596	Hoxton Park - Carnes Hill - Horningsea Park	1321.29	0.778057	0	2017-18
11597	West Hoxton - Middleton Grange	3	0.80944	0.02526	2017-18
11598	Liverpool	1372.51	0.815562	0.00500667	2017-18
11599	Lurnea - Cartwright	3	0.826259	0.0383933	2017-18
11600	Prestons - Edmondson Park	1711.88	0.898867	0	2017-18
11601	Warwick Farm	3	0.811117	0.0269	2017-18
11602	Caringbah	2513.93	0.796502	0	2017-18
11603	Caringbah South	3	0.773289	0.0142333	2017-18
11604	Cronulla - Kurnell - Bundeena	3112.01	0.733767	0	2017-18
11605	Lilli Pilli - Port Hacking - Dolans Bay	3	0.736666	0.0854667	2017-18
11606	Woolaware - Burraneer	3	0.734087	0	2017-18
11607	Engadine	3	0.900955	0.16304	2017-18
11608	Loftus - Yarrawarrah	2659.36	0.999149	0.482287	2017-18
11609	Woronora Heights	3	0.907357	0.197793	2017-18
21001	Alfredton	1178.2	1.25234	1	2017-18
21002	Ballarat	1673.41	1.19847	1	2017-18
21003	Ballarat - North	2508.15	1.19821	1	2017-18
21004	Ballarat - South	2524.61	1.12515	1	2017-18
21005	Buninyong	920.123	1.23481	1	2017-18
21006	Delacombe	610.722	1.14777	0.99986	2017-18
21007	Smythes Creek	495.808	1.23756	1	2017-18
21008	Wendouree - Miners Rest	1508.72	1.10903	0.999967	2017-18
21009	Bacchus Marsh Region	743.398	1.11699	0.999533	2017-18
21010	Creswick - Clunes	1015.11	1.11849	0.999927	2017-18
21011	Daylesford	1273.53	1.0533	0.973107	2017-18
21012	Gordon (Vic.)	630.393	1.11363	0.998607	2017-18
21013	Avoca	476.3	1.03904	0.826087	2017-18
21014	Beaufort	571.081	1.0717	0.968653	2017-18
21015	Golden Plains - North	529.306	1.13912	0.999447	2017-18
21016	Maryborough (Vic.)	1021.43	1.07257	0.98794	2017-18
21017	Maryborough Region	786.729	1.06647	0.973113	2017-18
21018	Bendigo	1699.06	1.12462	1	2017-18
21019	California Gully - Eaglehawk	1279.81	1.10448	0.99986	2017-18
21020	East Bendigo - Kennington	1614.08	1.21857	1	2017-18
21021	Flora Hill - Spring Gully	883.435	1.18965	1	2017-18
21022	Kangaroo Flat - Golden Square	2256.69	1.15285	1	2017-18
21023	Maiden Gully	528.117	1.26639	1	2017-18
21024	Strathfieldsaye	1131.94	1.30441	1	2017-18
21025	White Hills - Ascot	1203.57	1.20967	1	2017-18
21026	Bendigo Region - South	686.347	1.20394	1	2017-18
21027	Castlemaine	1665.16	1.23647	1	2017-18
21028	Castlemaine Region	1210.62	1.16505	1	2017-18
21029	Heathcote	640.279	1.04763	0.89946	2017-18
21030	Kyneton	1172.21	1.06949	0.991573	2017-18
21031	Woodend	944.189	1.17197	1	2017-18
21032	Bendigo Region - North	446.169	1.09747	0.991827	2017-18
21033	Loddon	969.686	1.06597	0.98384	2017-18
21034	Bannockburn	617.087	1.19719	0.999993	2017-18
21035	Golden Plains - South	771.121	1.12121	0.999833	2017-18
21036	Winchelsea	730.192	1.14372	0.99998	2017-18
21037	Belmont	1361.76	1.11427	0.999973	2017-18
21038	Corio - Norlane	2224.79	0.928044	0.000133333	2017-18
21039	Geelong	1592.87	1.12934	1	2017-18
21040	Geelong West - Hamlyn Heights	1869.88	1.12242	1	2017-18
21041	Grovedale	2286.49	1.18877	1	2017-18
21042	Highton	2640.84	1.28757	1	2017-18
21043	Lara	1756.7	1.13103	1	2017-18
21044	Leopold	1520.79	1.20825	1	2017-18
21045	Newcomb - Moolap	1508.75	1.0161	0.739027	2017-18
21046	Newtown (Vic.)	1129.07	1.17919	1	2017-18
21047	North Geelong - Bell Park	1542.21	1.03676	0.925133	2017-18
21048	Clifton Springs	1894.71	1.19096	1	2017-18
21049	Lorne - Anglesea	857.474	1.23082	1	2017-18
21050	Ocean Grove - Barwon Heads	2860.96	1.2388	1	2017-18
21051	Portarlington	1431.59	1.19951	1	2017-18
21052	Point Lonsdale - Queenscliff	808.928	1.29061	1	2017-18
21053	Torquay	2266.69	1.25048	1	2017-18
21054	Alexandra	1001.61	1.14215	0.999987	2017-18
21055	Euroa	854.304	1.05412	0.953473	2017-18
21056	Kilmore - Broadford	1444.21	1.05555	0.982053	2017-18
21057	Mansfield (Vic.)	1287.44	1.17885	1	2017-18
21058	Nagambie	525.38	1.05606	0.916993	2017-18
21059	Seymour	828.72	1.03269	0.827987	2017-18
21060	Seymour Region	313.178	1.11248	0.9915	2017-18
21061	Upper Yarra Valley	3	1.08817	0.790933	2017-18
21062	Yea	502.306	1.04832	0.8817	2017-18
21063	Benalla	1344.77	1.19814	1	2017-18
21064	Benalla Region	538.276	1.17455	0.99996	2017-18
21065	Rutherglen	554.494	1.16502	0.999953	2017-18
21066	Wangaratta	2411.1	1.20489	1	2017-18
21067	Wangaratta Region	1423.79	1.24256	1	2017-18
21068	Beechworth	734.406	1.20509	1	2017-18
21069	Bright - Mount Beauty	1255.44	1.22824	1	2017-18
21070	Chiltern - Indigo Valley	424.518	1.14767	0.999593	2017-18
21071	Myrtleford	652.14	1.17265	0.999987	2017-18
21072	Towong	848.848	1.09797	0.998173	2017-18
21073	West Wodonga	1458.51	1.14677	1	2017-18
21074	Wodonga	2544.9	1.10226	1	2017-18
21075	Yackandandah	709.865	1.31711	1	2017-18
21076	Drouin	1799.09	1.1218	1	2017-18
21077	Mount Baw Baw Region	815.206	1.13693	0.99998	2017-18
21078	Trafalgar (Vic.)	1020.64	1.19882	1	2017-18
21079	Warragul	2394.3	1.17982	1	2017-18
21081	Bairnsdale	2134.56	1.21265	1	2017-18
21082	Bruthen - Omeo	1116.23	1.18255	1	2017-18
21084	Lakes Entrance	1856.54	1.25653	1	2017-18
21085	Orbost	1114.06	1.21321	1	2017-18
21086	Paynesville	1218.6	1.25771	1	2017-18
21087	Foster	1442.48	1.22796	1	2017-18
21088	French Island	3	0.961492	0.42082	2017-18
21089	Korumburra	1169.72	1.1264	1	2017-18
21090	Leongatha	1500.31	1.20844	1	2017-18
21091	Phillip Island	1624.68	1.17967	1	2017-18
21092	Wilsons Promontory	3	1.10378	0.69156	2017-18
21093	Wonthaggi - Inverloch	3320.55	1.15097	1	2017-18
21094	Churchill	1423.79	1.16123	1	2017-18
21095	Moe - Newborough	2017.32	1.1084	1	2017-18
21096	Morwell	1353.39	0.962548	0.07142	2017-18
21097	Traralgon	2985.69	1.17279	1	2017-18
21098	Yallourn North - Glengarry	426.752	1.1386	0.99902	2017-18
21099	Alps - West	3	1.16069	0.958933	2017-18
21100	Longford - Loch Sport	551.212	1.12774	0.999213	2017-18
21101	Maffra	1761.18	1.13751	1	2017-18
21102	Rosedale	505.865	1.09292	0.9883	2017-18
21103	Sale	1786.55	1.15416	1	2017-18
21104	Yarram	749.32	1.06841	0.970433	2017-18
21105	Brunswick	1521.86	0.957075	0.0371733	2017-18
21106	Brunswick East	698.975	1.04658	0.90474	2017-18
21107	Brunswick West	964.992	0.99108	0.3786	2017-18
21108	Coburg	1981.18	1.00119	0.520873	2017-18
21109	Pascoe Vale South	889.605	1.06476	0.975467	2017-18
21110	Alphington - Fairfield	839.244	1.14065	0.999967	2017-18
21111	Northcote	2107.02	1.11421	1	2017-18
21112	Thornbury	1323.49	1.06329	0.990547	2017-18
21113	Ascot Vale	1281.67	1.10119	0.999827	2017-18
21114	Essendon - Aberfeldie	2686.73	1.15125	1	2017-18
21115	Flemington	539.845	0.99673	0.466627	2017-18
21116	Moonee Ponds	1414.04	1.10218	0.999887	2017-18
21117	Carlton	676.956	0.901312	0.00110667	2017-18
21118	Docklands	576.043	0.987331	0.370687	2017-18
21119	East Melbourne	552.716	1.03242	0.802447	2017-18
21120	Flemington Racecourse	3	1.04514	0.664587	2017-18
21121	Kensington (Vic.)	758.885	1.01377	0.654693	2017-18
21122	Melbourne	801.066	0.82784	0	2017-18
21123	North Melbourne	983.928	0.946841	0.03296	2017-18
21124	Parkville	383.114	1.02964	0.74938	2017-18
21125	South Yarra - West	432.867	0.890364	0.00301333	2017-18
21126	Southbank	1628.25	0.703181	0	2017-18
21128	Albert Park	1623.33	1.04196	0.955593	2017-18
21129	Elwood	1153.14	1.03507	0.886827	2017-18
21130	Port Melbourne	1506.93	1.03104	0.888007	2017-18
21131	Port Melbourne Industrial	143.113	1.03013	0.6872	2017-18
21132	South Melbourne	1011.61	0.950154	0.0440267	2017-18
21133	St Kilda	1725.44	0.927007	0.000526667	2017-18
21134	St Kilda East	900.696	0.92535	0.00554667	2017-18
21135	Armadale	834.074	1.00603	0.573507	2017-18
21136	Prahran - Windsor	1237.55	0.91744	0.00052	2017-18
21137	South Yarra - East	1300.23	0.942622	0.01196	2017-18
21138	Toorak	1405.71	0.905776	4e-05	2017-18
21139	Abbotsford	521.312	1.04932	0.890887	2017-18
21140	Carlton North - Princes Hill	759.189	1.08158	0.989747	2017-18
21141	Collingwood	471.239	0.918524	0.0166467	2017-18
21142	Fitzroy	747.16	0.959882	0.10984	2017-18
21143	Fitzroy North	1042.87	1.08831	0.998093	2017-18
21144	Richmond (Vic.)	2217.25	1.01921	0.822747	2017-18
21145	Yarra - North	980.362	1.12159	0.99992	2017-18
21146	Ashburton (Vic.)	865.842	1.12964	0.99986	2017-18
21147	Balwyn	1849.78	1.09643	0.999967	2017-18
21148	Balwyn North	2221.91	1.09553	1	2017-18
21149	Camberwell	2604.99	1.1802	1	2017-18
21150	Glen Iris - East	1951.04	1.18265	1	2017-18
21151	Hawthorn	1826.4	1.08623	0.99988	2017-18
21152	Hawthorn East	1233.02	1.09025	0.99934	2017-18
21153	Kew	2540.51	1.06748	0.99966	2017-18
21154	Kew East	740.86	1.14348	0.999933	2017-18
21155	Surrey Hills (West) - Canterbury	1960.2	1.15475	1	2017-18
21156	Bulleen	1246.45	1.10038	0.99978	2017-18
21157	Doncaster	2181.72	1.02335	0.86724	2017-18
21159	Templestowe	2116.69	1.0792	0.999847	2017-18
21160	Templestowe Lower	1480.64	1.09271	0.999813	2017-18
21161	Blackburn	2266.33	1.06407	0.994273	2017-18
21162	Blackburn South	1099.81	1.14726	1	2017-18
21163	Box Hill	1549.05	1.02824	0.80976	2017-18
21164	Box Hill North	1761.6	1.01968	0.747133	2017-18
21165	Burwood	885.576	1.17614	1	2017-18
21166	Burwood East	1024.77	1.20444	1	2017-18
21167	Surrey Hills (East) - Mont Albert	1173.11	1.11781	1	2017-18
21168	Beaumaris	1782.87	1.12883	1	2017-18
21169	Brighton (Vic.)	2969.26	1.08269	0.996147	2017-18
21170	Brighton East	1755.9	1.11164	1	2017-18
21171	Cheltenham - Highett (West)	1059.94	1.16656	1	2017-18
21172	Hampton	1975.98	1.08917	0.999973	2017-18
21173	Sandringham - Black Rock	2169.64	1.00265	0.538633	2017-18
21174	Bentleigh - McKinnon	2222.2	0.904437	0	2017-18
21176	Carnegie	1323.42	0.942528	0.00671333	2017-18
21177	Caulfield - North	1663.82	1.03249	0.873013	2017-18
21178	Caulfield - South	1590.87	1.01655	0.664947	2017-18
21179	Elsternwick	1088.08	1.01333	0.65752	2017-18
21180	Hughesdale	590.703	1.05605	0.96354	2017-18
21181	Murrumbeena	796.119	1.08032	0.992447	2017-18
21182	Ormond - Glen Huntly	1026.65	0.999384	0.49684	2017-18
21183	Aspendale Gardens - Waterways	904.197	0.978222	0.29008	2017-18
21184	Braeside	40.572	1.0277	0.892933	2017-18
21185	Carrum - Patterson Lakes	1317.42	1.13071	1	2017-18
21186	Chelsea - Bonbeach	1309.41	1.11583	0.99998	2017-18
21187	Chelsea Heights	533.672	0.940428	0.0341867	2017-18
21188	Cheltenham - Highett (East)	1982.73	1.12673	1	2017-18
21189	Edithvale - Aspendale	1218.86	1.06281	0.995807	2017-18
21190	Mentone	1410.87	1.10025	0.999987	2017-18
21191	Moorabbin - Heatherton	751.438	1.09259	0.999093	2017-18
21193	Mordialloc - Parkdale	1966.99	1.22806	1	2017-18
21194	Malvern - Glen Iris	1819.59	1.20241	1	2017-18
21195	Malvern East	1990.14	0.921866	0.00222667	2017-18
21196	Bundoora - East	1087.9	1.16816	1	2017-18
21197	Greensborough	2553.55	1.20532	1	2017-18
21198	Heidelberg - Rosanna	1517.6	1.1852	1	2017-18
21199	Heidelberg West	1009.4	1.19557	1	2017-18
21200	Ivanhoe	1368.44	1.15201	0.999993	2017-18
21201	Ivanhoe East - Eaglemont	1083.52	1.15045	0.99998	2017-18
21202	Montmorency - Briar Hill	1929.87	0.935917	0.00146	2017-18
21203	Viewbank - Yallambie	2011.05	0.968012	0.0672267	2017-18
21204	Watsonia	967.137	1.23613	1	2017-18
21205	Kingsbury	825.929	1.10583	0.993227	2017-18
21207	Reservoir - East	1842.37	1.05825	0.902373	2017-18
21208	Reservoir - West	1936.29	1.2071	1	2017-18
21209	Eltham	3089.37	1.20446	1	2017-18
21210	Hurstbridge	479.106	1.06008	0.924793	2017-18
21211	Kinglake	402.216	1.04065	0.86846	2017-18
21212	Panton Hill - St Andrews	667.353	0.914529	4.66667e-05	2017-18
21213	Plenty - Yarrambat	1126.84	1.05484	0.99164	2017-18
21214	Research - North Warrandyte	946.216	0.987923	0.331227	2017-18
21215	Wattle Glen - Diamond Creek	1550.35	0.889874	0	2017-18
21216	Bundoora - North	523.635	1.03522	0.905093	2017-18
21217	Bundoora - West	665.772	1.10721	0.999327	2017-18
21219	Lalor	1792.3	1.0239	0.749393	2017-18
21220	Mill Park - North	1781.92	1.11284	0.999847	2017-18
21221	Mill Park - South	1164.88	1.05758	0.998433	2017-18
21223	Thomastown	1824.66	1.13584	0.999907	2017-18
21224	Wallan	1311.57	1.21695	1	2017-18
21225	Whittlesea	908.684	1.18474	1	2017-18
21226	Airport West	657.11	0.804962	0	2017-18
21228	Keilor	1082.62	0.802882	0	2017-18
21229	Keilor East	2699.64	1.05372	0.992287	2017-18
21230	Niddrie - Essendon West	731.074	1.11477	0.999993	2017-18
21231	Strathmore	1085.93	0.841241	0	2017-18
21232	Gisborne	1444.1	1.0528	0.740813	2017-18
21233	Macedon	451.824	0.881905	0	2017-18
21234	Riddells Creek	527.212	0.956766	0.114473	2017-18
21235	Romsey	1041.86	0.985091	0.294847	2017-18
21236	Coburg North	566.358	1.10523	1	2017-18
21237	Fawkner	799.18	1.11053	0.99864	2017-18
21239	Pascoe Vale	1659.03	1.09115	0.9999	2017-18
21240	Sunbury	1592.99	1.08237	0.999847	2017-18
21241	Sunbury - South	2386.94	1.1793	1	2017-18
21242	Broadmeadows	776.234	1.25111	1	2017-18
21243	Campbellfield - Coolaroo	1163.41	1.09001	0.9989	2017-18
21245	Gladstone Park - Westmeadows	2029.11	1.22368	1	2017-18
21246	Greenvale - Bulla	1657.38	1.07569	0.998393	2017-18
21247	Meadow Heights	1072.24	1.1383	1	2017-18
21248	Melbourne Airport	3	1.18372	1	2017-18
21249	Roxburgh Park - Somerton	1419.57	1.089	0.998107	2017-18
21250	Tullamarine	619.028	1.13355	1	2017-18
21251	Bayswater	1076.4	1.12048	1	2017-18
21254	Knoxfield - Scoresby	1604.41	1.14514	0.999993	2017-18
21255	Lysterfield	675.214	1.1292	1	2017-18
21256	Rowville - Central	1683.39	1.09921	0.99532	2017-18
21257	Rowville - North	745.125	1.16753	0.999993	2017-18
21258	Rowville - South	1155.46	1.08759	0.999953	2017-18
21259	Wantirna	1671.66	1.12057	0.999993	2017-18
21260	Wantirna South	2035.89	1.0998	0.999147	2017-18
21261	Donvale - Park Orchards	1969.76	1.07734	0.994213	2017-18
21262	Warrandyte - Wonga Park	1498.38	1.08363	0.9998	2017-18
21263	Bayswater North	1094.76	1.05235	0.929373	2017-18
21265	Croydon Hills - Warranwood	2211.6	0.963311	0.0987467	2017-18
21266	Ringwood	1484.76	0.981098	0.191053	2017-18
21267	Ringwood East	2065.71	1.12474	1	2017-18
21268	Ringwood North	1191.83	1.01389	0.71462	2017-18
21269	Forest Hill	1060.52	0.874657	0	2017-18
21270	Mitcham (Vic.)	1593.26	1.01317	0.686067	2017-18
21271	Nunawading	1104.51	0.892907	1.33333e-05	2017-18
21272	Vermont	1131.54	1.07638	0.98858	2017-18
21273	Vermont South	1605.8	0.873882	2e-05	2017-18
21274	Belgrave - Selby	1093.31	0.823842	0	2017-18
21275	Chirnside Park	1202.85	0.886145	0.00014	2017-18
21276	Healesville - Yarra Glen	1691.47	1.00657	0.578127	2017-18
21277	Kilsyth	1027.17	0.956299	0.0448133	2017-18
21278	Lilydale - Coldstream	2068.46	0.904136	0.000533333	2017-18
21279	Monbulk - Silvan	696.321	0.752145	0	2017-18
21280	Montrose	791.647	0.906049	0	2017-18
21281	Mooroolbark	2126.98	1.08342	0.998247	2017-18
21282	Mount Dandenong - Olinda	1277.66	1.03722	0.968327	2017-18
21283	Mount Evelyn	991.631	0.8967	0.000773333	2017-18
21284	Upwey - Tecoma	1037.06	0.976321	0.15676	2017-18
21285	Wandin - Seville	800.615	1.02429	0.804847	2017-18
21286	Yarra Valley	1733.64	1.01726	0.75502	2017-18
21287	Beaconsfield - Officer	1230.73	0.869163	0	2017-18
21288	Bunyip - Garfield	969.876	1.1316	1	2017-18
21289	Emerald - Cockatoo	1950.46	1.08521	0.99988	2017-18
21290	Koo Wee Rup	734.258	1.14914	1	2017-18
21291	Pakenham - North	1038.72	1.09616	0.999953	2017-18
21292	Pakenham - South	1902.71	1.00778	0.63252	2017-18
21293	Berwick - North	2461.38	0.96967	0.09702	2017-18
21294	Berwick - South	1639.16	1.09103	1	2017-18
21295	Doveton	707.11	0.911519	0.0119467	2017-18
21297	Hallam	870.703	1.04562	0.915533	2017-18
21299	Narre Warren North	941.689	0.932604	0.00118667	2017-18
21300	Cranbourne	1463.87	0.966924	0.08372	2017-18
21301	Cranbourne East	1290.89	0.99329	0.423567	2017-18
21302	Cranbourne North	1103.56	1.02092	0.76664	2017-18
21303	Cranbourne South	854.346	0.964426	0.06242	2017-18
21304	Cranbourne West	685.173	0.987495	0.343013	2017-18
21305	Hampton Park - Lynbrook	1593.06	1.08487	0.999947	2017-18
21306	Lynbrook - Lyndhurst	725.02	1.11685	1	2017-18
21308	Pearcedale - Tooradin	798.514	1.04741	0.98064	2017-18
21309	Clarinda - Oakleigh South	1242.07	1.01635	0.652787	2017-18
21310	Clayton South	877.839	1.18109	1	2017-18
21311	Dandenong	1460.14	0.996933	0.45192	2017-18
21312	Dandenong North	2007.05	0.922797	0.00531333	2017-18
21313	Dingley Village	1237.58	1.11175	0.99982	2017-18
21314	Keysborough	2361.6	1.01921	0.711527	2017-18
21316	Noble Park North	703.59	0.926737	0.0132933	2017-18
21317	Springvale	1677.2	1.0442	0.939247	2017-18
21318	Springvale South	1171.23	1.04613	0.980367	2017-18
21319	Ashwood - Chadstone	1484.94	0.939558	0.00406667	2017-18
21320	Clayton	774.979	0.929072	0.00662667	2017-18
21321	Glen Waverley - East	2627.34	0.934497	0.0871133	2017-18
21322	Glen Waverley - West	1840.05	1.00393	0.55396	2017-18
21323	Mount Waverley - North	1659.67	1.03064	0.90002	2017-18
21324	Mount Waverley - South	1896.13	1.0015	0.526633	2017-18
21325	Mulgrave	1835.45	0.870466	0.00018	2017-18
21326	Oakleigh - Huntingdale	1679.53	0.930596	0.00190667	2017-18
21327	Wheelers Hill	2578.24	0.808063	0	2017-18
21328	Ardeer - Albion	472.206	1.06519	0.985827	2017-18
21329	Cairnlea	809.345	0.959808	0.0667267	2017-18
21330	Deer Park - Derrimut	1691.65	0.926131	0.0005	2017-18
21331	Delahey	768.473	0.964105	0.04558	2017-18
21332	Keilor Downs	1470.6	0.858276	0	2017-18
21333	Kings Park (Vic.)	1324.13	1.09979	1	2017-18
21334	St Albans - North	1565.78	1.06566	0.998787	2017-18
21335	St Albans - South	1527.09	0.929516	0.00135333	2017-18
21336	Sunshine	673.365	0.978486	0.231693	2017-18
21337	Sunshine North	1067.46	1.09044	0.999767	2017-18
21338	Sunshine West	1652.65	1.21144	1	2017-18
21339	Sydenham	846.964	1.05979	0.998047	2017-18
21340	Taylors Lakes	2113.28	1.11059	1	2017-18
21341	Altona	1420.84	1.12339	1	2017-18
21342	Altona Meadows	1903.15	1.17042	1	2017-18
21343	Altona North	989.051	1.01314	0.738687	2017-18
21344	Newport	1427.64	1.07363	0.99988	2017-18
21345	Seabrook	420.801	1.05351	0.99052	2017-18
21346	Williamstown	2040.85	1.03527	0.85832	2017-18
21347	Braybrook	1289.77	1.08956	0.97362	2017-18
21348	Footscray	851.873	1.18131	1	2017-18
21349	Maribyrnong	1013.29	1.15204	0.99936	2017-18
21350	Seddon - Kingsville	669.244	1.05342	0.940247	2017-18
21351	West Footscray - Tottenham	722.485	1.10775	0.9947	2017-18
21352	Yarraville	1138.6	1.06457	0.980547	2017-18
21353	Bacchus Marsh	2019.37	1.07482	0.9374	2017-18
21355	Hillside	1213.44	1.08	0.992573	2017-18
21356	Melton	1828.28	1.13143	0.99956	2017-18
21357	Melton South	1621.25	1.00925	0.592667	2017-18
21358	Melton West	960.896	1.10571	0.985187	2017-18
21359	Rockbank - Mount Cottrell	245.999	0.944831	0.0615733	2017-18
21360	Taylors Hill	1029.66	1.07892	0.99004	2017-18
21361	Hoppers Crossing - North	1727.62	1.11255	0.999967	2017-18
21362	Hoppers Crossing - South	1854.67	1.06351	0.9525	2017-18
21363	Laverton	455.512	1.11242	1	2017-18
21365	Tarneit	1393.32	1.07903	0.99768	2017-18
21366	Truganina	572.383	1.04609	0.846273	2017-18
21368	Werribee - South	1109.5	1.09607	0.990287	2017-18
21369	Wyndham Vale	1226.57	1.02977	0.776747	2017-18
21370	Carrum Downs	1555.22	1.12329	1	2017-18
21371	Frankston	1944.61	1.1178	1	2017-18
21372	Frankston North	1696.69	1.10569	0.989633	2017-18
21373	Frankston South	2100.8	1.0444	0.931213	2017-18
21374	Langwarrin	2259.06	1.09646	0.99952	2017-18
21375	Seaford (Vic.)	1505.09	1.19474	1	2017-18
21376	Skye - Sandhurst	1013.05	1.09136	0.999653	2017-18
21377	Dromana	1562.1	1.13726	0.99996	2017-18
21378	Flinders	874.622	1.09067	1	2017-18
21379	Hastings - Somers	2414.52	1.04273	0.63758	2017-18
21380	Mornington	3190.4	1.0174	0.8023	2017-18
21381	Mount Eliza	2278.07	0.981603	0.438107	2017-18
21382	Mount Martha	2222.14	0.986097	0.239753	2017-18
21383	Point Nepean	2265.16	1.01948	0.549893	2017-18
21384	Rosebud - McCrae	2685.36	1.04698	0.63788	2017-18
21385	Somerville	1990.09	0.971709	0.0627867	2017-18
21386	Ararat	888.769	0.928692	0.31078	2017-18
21387	Ararat Region	389.814	0.994463	0.473787	2017-18
21388	Horsham	1925.96	0.966926	0.43226	2017-18
21389	Horsham Region	380.97	1.05473	0.99948	2017-18
21390	Nhill Region	846.587	0.994692	0.477787	2017-18
21391	St Arnaud	486.953	0.996644	0.48528	2017-18
21392	Stawell	980.769	0.94038	0.00224	2017-18
21393	West Wimmera	356.357	1.02337	0.60818	2017-18
21394	Yarriambiack	884.616	0.978673	0.40666	2017-18
21395	Irymple	595.555	0.960222	0.324367	2017-18
21396	Merbein	484.478	0.983628	0.44536	2017-18
21398	Mildura Region	415.359	0.98262	0.38148	2017-18
21399	Red Cliffs	556.074	0.915425	0	2017-18
21400	Buloke	821.732	0.990345	0.458393	2017-18
21401	Gannawarra	960.106	1.0566	0.998487	2017-18
21402	Kerang	493.832	0.970178	0.43882	2017-18
21403	Robinvale	301.367	1.09692	1	2017-18
21404	Swan Hill	1290.42	0.877742	0.193193	2017-18
21405	Swan Hill Region	660.464	0.954708	0.29058	2017-18
21406	Echuca	1929.66	0.997189	0.441007	2017-18
21407	Kyabram	1239.13	0.927029	0.20774	2017-18
21408	Lockington - Gunbower	401.946	0.984438	0.42634	2017-18
21409	Rochester	485.386	0.928482	0.000206667	2017-18
21410	Rushworth	544.717	0.945948	0.00474	2017-18
21411	Cobram	779.856	0.849753	0.09272	2017-18
21412	Moira	354.495	0.976207	0.370313	2017-18
21413	Numurkah	1487.52	0.880088	0	2017-18
21414	Yarrawonga	1216.89	0.979322	0.175373	2017-18
21415	Mooroopna	908.31	0.909902	0.24268	2017-18
21416	Shepparton - North	2137.8	0.921045	0.2484	2017-18
21417	Shepparton - South	2191.76	0.92131	0.247193	2017-18
21418	Shepparton Region - East	454.564	0.967872	0.35196	2017-18
21419	Shepparton Region - West	1109.14	0.959581	0.01602	2017-18
21420	Glenelg (Vic.)	1156.6	1.02382	0.604747	2017-18
21421	Hamilton (Vic.)	1341.36	0.956206	0.01038	2017-18
21422	Portland	1410.35	0.958122	0.00631333	2017-18
21423	Southern Grampians	838.584	1.00547	0.528247	2017-18
21424	Doncaster East (North)	3265.96	1.21602	1	2017-18
21425	Doncaster East (South)	3	1.14202	1	2017-18
21426	Bentleigh East (North)	2382.73	1.03667	0.917273	2017-18
21427	Bentleigh East (South)	3	1.05008	0.966393	2017-18
21428	Preston - East	2468.52	1.22204	1	2017-18
21429	Preston - West	3	1.27744	1	2017-18
21430	Doreen	3	1.1145	0.99402	2017-18
21431	Epping - East	2654.76	1.16761	0.999987	2017-18
21432	Epping - South	3	1.05101	0.95998	2017-18
21433	Epping - West	3	0.993188	0.4316	2017-18
21434	Mernda	3	0.868264	0	2017-18
21435	South Morang (North)	3713.41	1.03035	0.895893	2017-18
21436	South Morang (South)	3	1.14688	1	2017-18
21437	Wollert	3	1.06988	0.99962	2017-18
21438	Glenroy	1983.1	1.11725	0.99948	2017-18
21439	Gowanbrae	3	1.08749	0.998713	2017-18
21440	Hadfield	3	1.10617	0.999993	2017-18
21441	Craigieburn - Central	3	1.15479	1	2017-18
21442	Craigieburn - North	3	1.18405	1	2017-18
21443	Craigieburn - South	3	1.16326	1	2017-18
21444	Craigieburn - West	2833.37	1.05929	0.975333	2017-18
21445	Mickleham - Yuroke	3	1.21683	1	2017-18
21446	Boronia	2643.7	1.09874	0.9994	2017-18
21447	Ferntree Gully (North)	3	1.12954	0.999793	2017-18
21448	Ferntree Gully (South) - Upper Ferntree Gully	2815.89	1.00844	0.641607	2017-18
21449	The Basin	3	1.09286	0.9993	2017-18
21450	Croydon - East	3187.33	0.819877	0	2017-18
21451	Croydon - West	3	0.92884	0.00962	2017-18
21452	Croydon South	3	1.09368	0.99762	2017-18
21453	Endeavour Hills - North	2613.32	0.982312	0.29564	2017-18
21454	Endeavour Hills - South	3	1.00967	0.647147	2017-18
21455	Narre Warren - North East	3	0.897506	6.66667e-06	2017-18
21456	Narre Warren - South West	2105.78	0.906088	1.33333e-05	2017-18
21457	Narre Warren South (East)	2018.09	0.895019	0.00012	2017-18
21458	Narre Warren South (West)	3	1.05142	0.97374	2017-18
21459	Noble Park - East	3	0.965356	0.09672	2017-18
21460	Noble Park - West	2150.98	0.927018	0.0004	2017-18
21461	Burnside	1948.08	1.12859	0.999967	2017-18
21462	Burnside Heights	3	1.06473	0.936433	2017-18
21463	Caroline Springs	3	0.858941	0.000833333	2017-18
21464	Point Cook - East	3	1.02438	0.76368	2017-18
21465	Point Cook - North	3	1.08444	0.96528	2017-18
21466	Point Cook - South	2530.17	1.06862	0.995133	2017-18
21467	Werribee - East	3	1.21298	1	2017-18
21468	Werribee - West	2646	1.06955	0.981607	2017-18
21469	Mildura - North	3356.16	0.977265	0.426513	2017-18
21470	Mildura - South	3	1.0606	0.998853	2017-18
21471	Camperdown	442.714	1.03462	0.770893	2017-18
21472	Colac	1222.74	1.10273	0.999713	2017-18
21473	Colac Region	783.215	1.06451	0.971093	2017-18
21474	Corangamite - North	637.221	1.06294	0.958467	2017-18
21475	Corangamite - South	788.652	1.05611	0.947133	2017-18
21476	Otway	552.637	1.11195	0.995367	2017-18
21477	Moyne - East	660.18	1.0143	0.654853	2017-18
21478	Moyne - West	1213.62	1.14043	1	2017-18
21479	Warrnambool - North	2449.45	1.13277	1	2017-18
21480	Warrnambool - South	1296.56	1.15896	1	2017-18
31001	Alexandra Hills	1396.19	0.927586	0.00133333	2017-18
31002	Belmont - Gumdale	734.513	1.01757	0.699327	2017-18
31003	Birkdale	1485.14	1.05113	0.976013	2017-18
31004	Capalaba	1744.78	0.961219	0.0437133	2017-18
31005	Thorneside	357.808	1.00854	0.567867	2017-18
31006	Wellington Point	1345.66	1.10404	0.999873	2017-18
31007	Cleveland	1932	1.00232	0.54068	2017-18
31008	Ormiston	616.333	1.05574	0.92114	2017-18
31009	Redland Bay	1560.31	1.00314	0.551233	2017-18
31011	Sheldon - Mount Cotton	565.866	0.958316	0.115093	2017-18
31012	Thornlands	1241.95	0.996551	0.450013	2017-18
31013	Victoria Point	1515.19	1.02194	0.80512	2017-18
31014	Brisbane Port - Lytton	3	0.999421	0.493087	2017-18
31015	Manly - Lota	830.038	1.05606	0.96422	2017-18
31016	Manly West	1023.93	0.959479	0.208587	2017-18
31017	Murarrie	272.007	0.965705	0.15656	2017-18
31018	Tingalpa	737.822	1.01847	0.68476	2017-18
31019	Wakerley	516.413	0.980275	0.228913	2017-18
31020	Wynnum	1288.57	0.915605	0.000813333	2017-18
31021	Wynnum West - Hemmant	1165.42	0.978408	0.281173	2017-18
31022	Bald Hills	587.953	1.06637	0.978353	2017-18
31023	Bridgeman Downs	835.718	1.07128	0.98158	2017-18
31024	Carseldine	813.342	1.01679	0.68314	2017-18
31025	Everton Park	700.399	1.0608	0.952973	2017-18
31026	McDowall	684.132	1.00555	0.582247	2017-18
31027	Aspley	1245.21	0.898536	0.00191333	2017-18
31028	Chermside	554.619	0.980163	0.295853	2017-18
31029	Chermside West	597.013	0.931173	0.0670933	2017-18
31030	Geebung	324.332	0.929334	0.0119533	2017-18
31031	Kedron - Gordon Park	796.496	0.932259	0.03748	2017-18
31032	Stafford	460.598	1.01336	0.64758	2017-18
31033	Stafford Heights	677.361	0.992272	0.407533	2017-18
31034	Wavell Heights	789.264	0.968209	0.167667	2017-18
31035	Boondall	780.737	0.93617	0.20382	2017-18
31036	Brisbane Airport	3	0.95246	0.26034	2017-18
31037	Eagle Farm - Pinkenba	45.7245	0.970808	0.243153	2017-18
31038	Northgate - Virginia	480.336	0.933422	0.0217867	2017-18
31039	Nudgee - Banyo	714.471	0.864276	1.33333e-05	2017-18
31040	Nundah	660.972	1.03141	0.901873	2017-18
31041	Bracken Ridge	1617.26	1.0132	0.66206	2017-18
31042	Brighton (Qld)	911.281	0.885617	0.00907333	2017-18
31043	Deagon	282.299	1.07826	0.98154	2017-18
31044	Sandgate - Shorncliffe	702.331	0.960687	0.105313	2017-18
31045	Taigum - Fitzgibbon	867.673	0.896253	0.00214	2017-18
31046	Zillmere	516.553	0.979434	0.279493	2017-18
31047	Camp Hill	688.275	0.912738	0.0206133	2017-18
31048	Cannon Hill	366.434	0.967637	0.16098	2017-18
31049	Carina	797.806	0.938562	0.0658	2017-18
31050	Carina Heights	426.748	1.05988	0.994547	2017-18
31051	Carindale	1833.08	0.900419	0.00161333	2017-18
31052	Annerley	607.949	0.952913	0.0434867	2017-18
31053	Coorparoo	1111.28	0.976276	0.29816	2017-18
31054	Fairfield - Dutton Park	356.778	0.923619	0.01952	2017-18
31055	Greenslopes	547.8	0.979378	0.287713	2017-18
31056	Holland Park	591.551	0.967349	0.2175	2017-18
31057	Holland Park West	410.321	0.890116	0.00659333	2017-18
31058	Woolloongabba	327.327	0.982937	0.308213	2017-18
31059	Yeronga	693.397	0.949873	0.0316467	2017-18
31060	Eight Mile Plains	1142.3	0.943746	0.06926	2017-18
31061	Macgregor (Qld)	445.926	1.03275	0.84406	2017-18
31062	Mansfield (Qld)	887.312	0.935638	0.00906	2017-18
31063	Mount Gravatt	1095.34	1.02184	0.716427	2017-18
31064	Rochedale - Burbank	507.703	0.906002	0.00601333	2017-18
31065	Upper Mount Gravatt	434.982	1.01403	0.679287	2017-18
31066	Wishart	978.584	0.91047	0.0227533	2017-18
31067	Coopers Plains	334.183	1.01396	0.659593	2017-18
31068	Moorooka	784.298	0.935524	0.0679933	2017-18
31069	Robertson	382.872	0.948479	0.100273	2017-18
31070	Salisbury - Nathan	482.153	1.03225	0.843687	2017-18
31071	Tarragindi	822.697	0.890791	0.000606667	2017-18
31072	Algester	612.92	0.962624	0.0603333	2017-18
31073	Calamvale - Stretton	1537.39	0.915679	0.02686	2017-18
31074	Pallara - Willawong	296.719	0.971127	0.15048	2017-18
31075	Parkinson - Drewvale	1081.01	0.778654	0	2017-18
31076	Rocklea - Acacia Ridge	621.786	0.985791	0.33998	2017-18
31077	Kuraby	578.613	1.00441	0.560013	2017-18
31078	Runcorn	1041.08	0.906051	0.00118	2017-18
31079	Sunnybank	820.885	0.910843	6e-05	2017-18
31080	Sunnybank Hills	1502.72	1.01068	0.633507	2017-18
31081	Jindalee - Mount Ommaney	945.95	1.07154	0.9709	2017-18
31082	Middle Park - Jamboree Heights	699.84	1.0171	0.64042	2017-18
31083	Riverhills	330.055	1.08362	0.9933	2017-18
31084	Seventeen Mile Rocks - Sinnamon Park	882.113	1.01338	0.624713	2017-18
31085	Westlake	486.58	1.10611	0.999307	2017-18
31086	Bellbowrie - Moggill	960.344	1.01564	0.668527	2017-18
31087	Brookfield - Kenmore Hills	672.519	1.05416	0.961973	2017-18
31088	Chapel Hill	1033.47	1.05345	0.86652	2017-18
31089	Fig Tree Pocket	372.609	1.0035	0.546767	2017-18
31090	Kenmore	1048.14	1.04506	0.86296	2017-18
31091	Pinjarra Hills - Pullenvale	517.99	1.01588	0.6698	2017-18
31092	Chelmer - Graceville	660.939	1.02623	0.70928	2017-18
31093	Corinda	415.043	0.990656	0.38242	2017-18
31094	Indooroopilly	951.196	1.11551	0.996453	2017-18
31095	Sherwood	521.009	0.942397	0.06348	2017-18
31096	St Lucia	562.005	1.00391	0.532693	2017-18
31097	Taringa	421.277	0.935979	0.076	2017-18
31098	Enoggera	398.175	0.993009	0.46572	2017-18
31099	Enoggera Reservoir	3	0.892175	0.00204	2017-18
31100	Keperra	520.687	1.00839	0.585867	2017-18
31101	Mitchelton	564.284	1.08495	0.999627	2017-18
31103	The Gap	1709.09	1.11035	0.999227	2017-18
31104	Upper Kedron - Ferny Grove	830.194	0.739837	0	2017-18
31105	Brisbane City	687.332	0.867953	0.00162	2017-18
31106	Fortitude Valley	304.703	0.972879	0.25538	2017-18
31107	Highgate Hill	474.634	0.904455	0.01444	2017-18
31108	Kangaroo Point	402.35	0.894966	6.66667e-06	2017-18
31109	New Farm	1192.38	0.886178	0.00811333	2017-18
31110	South Brisbane	335.381	0.909498	0.0158133	2017-18
31111	Spring Hill	386.373	0.979036	0.268513	2017-18
31112	West End	770.125	1.03297	0.728353	2017-18
31113	Balmoral	309.795	1.00459	0.546167	2017-18
31114	Bulimba	563.294	0.939952	0.06182	2017-18
31115	East Brisbane	536.473	0.981337	0.349147	2017-18
31116	Hawthorne	335.862	0.93578	0.0287733	2017-18
31117	Morningside - Seven Hills	708.228	0.948818	0.0919733	2017-18
31118	Norman Park	461.288	0.874042	0.00649333	2017-18
31119	Albion	217.48	1.01367	0.628287	2017-18
31120	Alderley	455.769	0.874819	0.000966667	2017-18
31121	Ascot	420.471	0.949984	0.0683	2017-18
31122	Clayfield	712.39	0.959264	0.193153	2017-18
31123	Grange	316.66	0.87966	0.000453333	2017-18
31124	Hamilton (Qld)	506.136	0.948665	0.12178	2017-18
31125	Hendra	414.857	0.967364	0.217493	2017-18
31126	Kelvin Grove - Herston	455.152	1.03028	0.743093	2017-18
31127	Newmarket	330.48	0.889193	0.00318667	2017-18
31128	Newstead - Bowen Hills	380.986	1.03658	0.778673	2017-18
31129	Wilston	333.26	0.933373	0.0608533	2017-18
31130	Windsor	406.487	0.931445	0.0253867	2017-18
31131	Wooloowin - Lutwyche	607.886	1.04987	0.954273	2017-18
31132	Ashgrove	1091.88	0.911247	0.0275933	2017-18
31133	Auchenflower	289.584	1.03525	0.837093	2017-18
31134	Bardon	750.258	0.968411	0.16416	2017-18
31135	Paddington - Milton	809.004	0.963017	0.211667	2017-18
31136	Red Hill (Qld)	360.142	1.01087	0.634727	2017-18
31137	Toowong	881.372	1.0212	0.68642	2017-18
31138	Brinsmead	472.816	1.01665	0.724547	2017-18
31139	Clifton Beach - Kewarra Beach	1225.47	1.04474	0.844853	2017-18
31140	Freshwater - Stratford	464.317	1.05416	0.968853	2017-18
31141	Redlynch	1154.73	0.977604	0.193893	2017-18
31142	Trinity Beach - Smithfield	1306.18	0.881796	0.000866667	2017-18
31143	Yorkeys Knob - Machans Beach	534.654	0.906123	0.0151467	2017-18
31144	Bentley Park	400.323	0.850975	0	2017-18
31145	Cairns City	1205.41	0.959602	0.0920867	2017-18
31146	Earlville - Bayview Heights	935.398	0.933782	0.0217133	2017-18
31147	Edmonton	762.834	0.924125	0.0127	2017-18
31148	Gordonvale - Trinity	696.385	0.922279	0.00689333	2017-18
31149	Kanimbla - Mooroobool	787.689	0.775655	0	2017-18
31151	Manoora	327.143	0.836981	2e-05	2017-18
31152	Manunda	445.509	0.952405	0.0845667	2017-18
31153	Mount Sheridan	673.554	0.839549	6.66667e-06	2017-18
31154	Westcourt - Bungalow	513.458	0.82234	2e-05	2017-18
31155	White Rock	287.643	0.952405	0.0624533	2017-18
31156	Whitfield - Edge Hill	873.274	0.888711	0.00755333	2017-18
31157	Woree	275.565	0.955519	0.151047	2017-18
31158	Babinda	418.869	0.972036	0.16006	2017-18
31159	Innisfail	1117.84	1.01198	0.630313	2017-18
31160	Johnstone	739.134	1.03696	0.920413	2017-18
31161	Tully	1393.11	0.571059	0	2017-18
31163	Yarrabah	84.3697	1.01195	0.631347	2017-18
31164	Daintree	766.643	0.913704	0.0117267	2017-18
31165	Port Douglas	539.253	1.08085	0.9988	2017-18
31166	Atherton	1485.17	0.915731	0.00679333	2017-18
31167	Herberton	701.033	0.957095	0.12436	2017-18
31168	Kuranda	528.49	1.10096	0.999667	2017-18
31169	Malanda - Yungaburra	1125.63	0.9902	0.351927	2017-18
31170	Mareeba	1328.61	0.808167	0	2017-18
31171	Balonne	346.591	0.955564	0.10084	2017-18
31172	Chinchilla	617.254	0.927629	0.0189933	2017-18
31173	Goondiwindi	573.134	1.01826	0.657953	2017-18
31174	Inglewood - Waggamba	462.871	0.920678	0.0289733	2017-18
31175	Miles - Wandoan	323.501	0.931308	0.0300933	2017-18
31176	Roma	592.38	0.947492	0.112907	2017-18
31177	Roma Region	470.366	0.89327	0.00281333	2017-18
31178	Tara	403.499	1.04943	0.950813	2017-18
31179	Crows Nest - Rosalie	1038.94	0.929161	0.0159733	2017-18
31180	Jondaryan	659.946	0.931394	0.0600933	2017-18
31181	Millmerran	336.767	0.915223	0.000706667	2017-18
31182	Pittsworth	1074.19	0.908415	4e-05	2017-18
31183	Wambo	1420.47	0.983098	0.321927	2017-18
31184	Clifton - Greenmount	576.076	0.967381	0.210427	2017-18
31185	Southern Downs - East	462.886	0.909327	0.01022	2017-18
31186	Southern Downs - West	500.934	0.998796	0.485227	2017-18
31187	Stanthorpe	757.29	1.06739	0.958353	2017-18
31188	Stanthorpe Region	691.752	0.945078	0.00941333	2017-18
31189	Warwick	1605.68	0.762854	0	2017-18
31190	Central Highlands - East	338.133	0.854481	0	2017-18
31191	Central Highlands - West	798.216	0.888437	0.00100667	2017-18
31192	Emerald	493.154	0.798496	0	2017-18
31205	Berserker	426.302	1.01691	0.619207	2017-18
31206	Bouldercombe	217.727	1.04902	0.914433	2017-18
31207	Emu Park	647.512	1.07796	0.989673	2017-18
31208	Frenchville - Mount Archer	917.974	1.11927	0.994547	2017-18
31209	Glenlee - Rockyview	441.599	0.957615	0.0867867	2017-18
31210	Gracemere	891.319	0.92735	0.05526	2017-18
31211	Lakes Creek	373.776	0.908988	0.02266	2017-18
31212	Mount Morgan	347.028	1.10907	0.998807	2017-18
31213	Norman Gardens	851.861	0.952848	0.118627	2017-18
31214	Park Avenue	433.6	0.958325	0.149353	2017-18
31215	Parkhurst - Kawana	476.13	0.948929	0.0980467	2017-18
31216	Rockhampton - West	492.415	0.872189	4e-05	2017-18
31217	Rockhampton City	628.226	1.06972	0.96324	2017-18
31218	Rockhampton Region - East	565.48	1.05404	0.912213	2017-18
31219	Rockhampton Region - North	498.759	1.01169	0.59862	2017-18
31220	Rockhampton Region - West	297.403	0.950562	0.238553	2017-18
31221	Shoalwater Bay	3	0.94858	0.0839733	2017-18
31222	The Range - Allenstown	643.315	1.04729	0.980267	2017-18
31223	Yeppoon	1983.01	0.945316	0.0500067	2017-18
31224	Broadbeach Waters	785.566	0.898703	0.000946667	2017-18
31225	Burleigh Heads	873.593	0.91335	0.000706667	2017-18
31226	Burleigh Waters	1481.77	0.834905	0	2017-18
31227	Mermaid Beach - Broadbeach	1138.46	0.956786	0.0489467	2017-18
31228	Mermaid Waters	1296.02	0.950209	0.0254	2017-18
31229	Miami	672.718	0.940223	0.0793867	2017-18
31230	Coolangatta	739.4	0.971272	0.1124	2017-18
31231	Currumbin - Tugun	1126.6	0.97349	0.22352	2017-18
31232	Currumbin Waters	885.398	0.935464	0.00228	2017-18
31233	Elanora	1449.72	0.942613	0.0598267	2017-18
31234	Palm Beach	1117.08	0.875931	6.66667e-06	2017-18
31235	Arundel	871.045	0.968499	0.1601	2017-18
31236	Biggera Waters	660.428	0.923723	0.00016	2017-18
31237	Coombabah	1052.22	0.893152	6.66667e-06	2017-18
31238	Labrador	1548.8	0.974687	0.23124	2017-18
31239	Paradise Point - Hollywell	1307.42	0.866568	0.000106667	2017-18
31240	Runaway Bay	1307.81	0.983175	0.22666	2017-18
31241	Guanaba - Springbrook	416.218	0.915925	0.000606667	2017-18
31242	Tamborine - Canungra	1662.32	0.946475	0.103887	2017-18
31243	Currumbin Valley - Tallebudgera	694.072	0.949258	0.0180867	2017-18
31244	Mudgeeraba - Bonogin	1652.02	0.920385	0.000486667	2017-18
31245	Reedy Creek - Andrews	597.443	0.872959	0.00121333	2017-18
31246	Carrara	942.14	0.881528	0	2017-18
31247	Highland Park	794.149	0.915359	0.0240333	2017-18
31248	Nerang - Mount Nathan	1926.64	0.834214	0	2017-18
31249	Pacific Pines - Gaven	1136.82	0.971874	0.08022	2017-18
31250	Worongary - Tallai	724.917	0.929577	0.00610667	2017-18
31251	Coomera	575.224	0.948674	0.0246467	2017-18
31252	Helensvale	1875.58	0.892597	0.00133333	2017-18
31253	Hope Island	1146.18	0.987159	0.356073	2017-18
31254	Jacobs Well - Alberton	388.99	0.94644	0.0284067	2017-18
31255	Ormeau - Yatala	1382.7	0.885217	0.000433333	2017-18
31256	Oxenford - Maudsland	1395.31	0.937847	0.0992733	2017-18
31257	Pimpama	373.47	0.879873	0	2017-18
31258	Upper Coomera - Willow Vale	1597.03	0.951252	0.123053	2017-18
31259	Clear Island Waters	426.247	0.95249	0.101593	2017-18
31260	Merrimac	441.609	0.911306	1.33333e-05	2017-18
31261	Robina	2281.79	0.811552	0	2017-18
31262	Varsity Lakes	1010.92	1.00148	0.515107	2017-18
31263	Ashmore	1251.25	0.818944	0.000133333	2017-18
31264	Molendinar	505.942	1.00227	0.534273	2017-18
31265	Parkwood	771.59	0.949333	0.0705	2017-18
31267	Benowa	1051.82	0.964715	0.108053	2017-18
31268	Bundall	565.472	0.906583	0.00158	2017-18
31269	Main Beach	259.077	0.756357	0	2017-18
31270	Surfers Paradise	1637.14	0.869942	0.00026	2017-18
31271	Darra - Sumner	358.105	0.814373	0	2017-18
31272	Durack	564.905	0.847065	0	2017-18
31273	Forest Lake - Doolandella	1920.89	1.05305	0.881033	2017-18
31274	Inala - Richlands	1060.71	0.965408	0.198587	2017-18
31275	Oxley (Qld)	562.776	0.990228	0.393707	2017-18
31276	Wacol	166.895	0.793046	0	2017-18
31277	Boonah	1319.63	0.853083	1.33333e-05	2017-18
31278	Esk	671.535	0.906987	0.000193333	2017-18
31280	Lockyer Valley - East	1891.25	0.957661	0.1806	2017-18
31281	Lowood	1235.46	0.73356	0	2017-18
31282	Rosewood	1094.77	0.880452	0.00014	2017-18
31283	Brassall	757.63	0.918883	0.0066	2017-18
31284	Bundamba	587.25	0.838607	0.02142	2017-18
31285	Churchill - Yamanto	471.337	0.865032	7.33333e-05	2017-18
31286	Ipswich - Central	670.93	0.692499	0	2017-18
31287	Ipswich - East	1343.34	0.734136	0	2017-18
31288	Ipswich - North	419.082	0.840019	2e-05	2017-18
31289	Karalee - Barellan Point	464.11	0.878957	0.000133333	2017-18
31290	Karana Downs	608.155	0.899881	4e-05	2017-18
31291	Leichhardt - One Mile	465.461	0.819201	0	2017-18
31292	North Ipswich - Tivoli	563.838	0.727686	0	2017-18
31293	Raceview	1126.45	0.876721	0.000713333	2017-18
31294	Ripley	289.733	0.91086	0.00846667	2017-18
31295	Riverview	179.781	0.994195	0.440393	2017-18
31296	Bellbird Park - Brookwater	658.13	0.858537	0	2017-18
31297	Camira - Gailes	749.514	0.817979	0	2017-18
31298	Carole Park	3	0.905446	0.01322	2017-18
31299	Collingwood Park - Redbank	561.492	0.708748	0	2017-18
31300	Goodna	553.209	0.878489	0.000146667	2017-18
31302	Redbank Plains	837.637	0.6858	0	2017-18
31303	Springfield	375.788	0.898967	0.00832	2017-18
31304	Springfield Lakes	614.34	0.850826	0	2017-18
31305	Beaudesert	1220.38	0.937803	0.0153133	2017-18
31306	Beenleigh	742.054	0.907818	1.33333e-05	2017-18
31307	Eagleby	778.022	0.946985	0.05996	2017-18
31308	Edens Landing - Holmview	463.15	0.899232	0.000813333	2017-18
31309	Mount Warren Park	492.002	0.969599	0.179047	2017-18
31310	Wolffdene - Bahrs Scrub	567.019	0.884301	2.66667e-05	2017-18
31311	Boronia Heights - Park Ridge	934.638	0.79753	0	2017-18
31312	Browns Plains	546.353	0.936536	0.01188	2017-18
31313	Chambers Flat - Logan Reserve	411.009	0.82703	0	2017-18
31314	Crestmead	527.297	0.877797	0.000186667	2017-18
31316	Hillcrest	606.372	0.71429	0	2017-18
31317	Marsden	603.918	0.74366	0	2017-18
31318	Munruben - Park Ridge South	425.351	0.937298	0.00823333	2017-18
31319	Regents Park - Heritage Park	1012.37	0.744114	0	2017-18
31320	Greenbank	1021.95	0.899836	0.000186667	2017-18
31321	Jimboomba	1701.2	0.929036	0.0316133	2017-18
31322	Logan Village	658.573	0.69024	0	2017-18
31323	Bethania - Waterford	768.486	0.971626	0.207	2017-18
31324	Cornubia - Carbrook	780.648	0.866191	0.00028	2017-18
31325	Loganholme - Tanah Merah	949.585	0.897527	0.0119333	2017-18
31326	Loganlea	585.136	0.965508	0.169587	2017-18
31327	Shailer Park	996.187	0.803185	0	2017-18
31328	Waterford West	506.806	1.01972	0.755313	2017-18
31329	Daisy Hill	561.867	0.990999	0.43036	2017-18
31330	Kingston (Qld.)	615.501	0.995338	0.444207	2017-18
31331	Logan Central	368.535	0.966907	0.36096	2017-18
31332	Rochedale South - Priestdale	1264.56	1.00287	0.532107	2017-18
31333	Slacks Creek	655.644	0.965279	0.31132	2017-18
31334	Springwood	920.162	1.12519	0.999987	2017-18
31335	Underwood	448.428	0.949038	0.09916	2017-18
31336	Woodridge	657.036	1.1168	0.9976	2017-18
31337	Bowen	646.592	1.02242	0.716993	2017-18
31338	Broadsound - Nebo	404.656	0.993603	0.404807	2017-18
31339	Clermont	254.214	1.06659	0.97536	2017-18
31340	Collinsville	615.986	1.00307	0.529527	2017-18
31341	Moranbah	297.984	0.985145	0.382633	2017-18
31342	Andergrove - Beaconsfield	1144.07	0.951989	0.100833	2017-18
31343	East Mackay	266.784	1.08906	0.998067	2017-18
31344	Eimeo - Rural View	791.769	1.00738	0.57042	2017-18
31345	Eungella Hinterland	3	0.898198	0.00022	2017-18
31346	Mackay	620.076	1.01808	0.707293	2017-18
31347	Mackay Harbour	3	1.0222	0.83422	2017-18
31348	Mount Pleasant - Glenella	1195.74	1.08156	0.999993	2017-18
31349	North Mackay	440.026	1.0562	0.879573	2017-18
31350	Ooralea - Bakers Creek	578.466	0.868164	0	2017-18
31351	Pioneer Valley	648.205	0.865824	0	2017-18
31352	Sarina	1224.52	1.03298	0.742727	2017-18
31353	Seaforth - Calen	830.77	0.933564	0.02814	2017-18
31354	Shoal Point - Bucasia	397.086	1.0455	0.84274	2017-18
31355	Slade Point	359.571	1.03248	0.791653	2017-18
31356	South Mackay	552.761	1.0037	0.54114	2017-18
31357	Walkerston - Eton	1119.94	1.04918	0.97262	2017-18
31358	West Mackay	470.738	0.881469	0	2017-18
31359	Airlie - Whitsundays	960.516	0.998305	0.48166	2017-18
31361	Proserpine	870.55	1.04647	0.95438	2017-18
31362	Beachmere - Sandstone Point	1926.86	0.985224	0.38268	2017-18
31363	Bribie Island	3086.81	0.920159	0.00739333	2017-18
31364	Burpengary - East	398.125	0.975463	0.166953	2017-18
31365	Caboolture	2017.76	0.961679	0.06974	2017-18
31366	Caboolture - South	1252.86	0.988096	0.313513	2017-18
31367	Elimbah	358.994	1.06917	0.99708	2017-18
31368	Morayfield - East	582.711	1.07512	0.997767	2017-18
31369	Wamuran	465.152	1.05601	0.9528	2017-18
31370	Kilcoy	584.143	1.0558	0.936347	2017-18
31371	Woodford - D'Aguilar	708.827	1.08213	0.99992	2017-18
31372	Burpengary	1501.38	1.09125	0.999607	2017-18
31373	Deception Bay	1783.76	0.9384	0.00305333	2017-18
31374	Morayfield	692.696	0.997006	0.458273	2017-18
31375	Narangba	1341.08	0.998028	0.465893	2017-18
31376	Upper Caboolture	293.058	0.958196	0.0955667	2017-18
31377	Clontarf	812.212	0.920156	0.0274667	2017-18
31378	Margate - Woody Point	1403.41	1.06719	0.974133	2017-18
31379	Redcliffe	1280.22	0.925065	0.00422	2017-18
31380	Rothwell - Kippa-Ring	1521.31	0.847092	0.0269933	2017-18
31382	Albany Creek	1630.33	0.891305	0.04452	2017-18
31383	Cashmere	1435.45	0.54951	0	2017-18
31384	Dayboro	855.544	0.63938	0	2017-18
31385	Eatons Hill	618.822	0.900718	0.0108733	2017-18
31386	The Hills District	2222.82	0.597908	0	2017-18
31387	Samford Valley	1411.06	0.466289	0	2017-18
31388	Dakabin - Kallangur	1712.94	0.74222	0	2017-18
31389	Murrumba Downs - Griffin	1114.51	0.579195	0	2017-18
31390	North Lakes - Mango Hill	1747.5	0.636852	0	2017-18
31391	Bray Park	789.2	0.584375	0	2017-18
31392	Lawnton	472.322	0.793284	6.66667e-06	2017-18
31393	Petrie	841.634	0.908354	0.0112733	2017-18
31394	Strathpine - Brendale	1065.52	0.921193	0.0309867	2017-18
31395	Aurukun	3	0.751609	2.66667e-05	2017-18
31396	Cape York	454.791	0.841036	0.00012	2017-18
31397	Croydon - Etheridge	103.765	0.923259	0.0415	2017-18
31398	Kowanyama - Pormpuraaw	61.7589	1.0601	0.991247	2017-18
31399	Northern Peninsula	72.8628	1.1065	1	2017-18
31400	Tablelands	362.98	0.975697	0.214393	2017-18
31401	Torres	111.687	1.05929	0.948513	2017-18
31402	Torres Strait Islands	125.206	1.10027	0.999533	2017-18
31403	Weipa	131.821	1.01886	0.72436	2017-18
31404	Carpentaria	197.675	0.98645	0.335427	2017-18
31405	Mount Isa	843.079	1.10936	0.99998	2017-18
31406	Mount Isa Region	206.204	1.1576	1	2017-18
31407	Northern Highlands	255.512	1.11204	0.999833	2017-18
31408	Barcaldine - Blackall	483.389	1.08573	0.99702	2017-18
31409	Charleville	360.944	1.01867	0.694933	2017-18
31410	Far Central West	159.423	1.0784	0.997893	2017-18
31411	Far South West	252.109	1.08917	0.999507	2017-18
31412	Longreach	350.415	1.00382	0.57404	2017-18
31413	Buderim - North	1662.24	1.01072	0.654993	2017-18
31414	Buderim - South	2009.48	1.0241	0.789627	2017-18
31415	Mountain Creek	800.374	1.04764	0.963167	2017-18
31416	Sippy Downs	757.355	0.978007	0.26826	2017-18
31417	Aroona - Currimundi	1219.83	1.05742	0.984753	2017-18
31418	Buddina - Minyama	1013.35	1.0111	0.630507	2017-18
31419	Caloundra - Kings Beach	809.674	1.06052	0.987093	2017-18
31420	Caloundra - West	1854.41	1.03534	0.84268	2017-18
31421	Golden Beach - Pelican Waters	1772.72	1.05342	0.96234	2017-18
31422	Moffat Beach - Battery Hill	1076.05	1.07509	0.989333	2017-18
31423	Parrearra - Warana	964.041	1.07317	0.995333	2017-18
31424	Wurtulla - Birtinya	674.49	1.02098	0.691653	2017-18
31425	Coolum Beach	1304.28	0.962991	0.121073	2017-18
31426	Marcoola - Mudjimba	1393.5	0.899182	0.000913333	2017-18
31427	Maroochydore - Kuluin	2429.69	0.951868	0.08852	2017-18
31428	Mooloolaba - Alexandra Headland	1282.62	1.01117	0.605213	2017-18
31434	Noosa Heads	1013.47	1.11484	0.99998	2017-18
31435	Noosaville	1385.47	0.945415	0.0282333	2017-18
31437	Sunshine Beach	652.805	1.09991	0.994053	2017-18
31438	Tewantin	1429.76	0.806764	0	2017-18
31439	Beerwah	837.799	0.949649	0.0237667	2017-18
31440	Caloundra Hinterland	1361.17	1.00383	0.547587	2017-18
31441	Glass House Mountains	665.166	0.981811	0.276933	2017-18
31442	Landsborough	1124	0.899614	6e-05	2017-18
31443	Maroochy Hinterland	984.891	0.870055	6.66667e-06	2017-18
31444	Palmwoods	1284.63	0.886209	0.00044	2017-18
31445	Cambooya - Wyreema	512.723	0.867002	0.000106667	2017-18
31446	Darling Heights	854.184	0.981862	0.298133	2017-18
31447	Drayton - Harristown	729.09	0.933787	0.0570267	2017-18
31448	Gatton	641.985	0.91597	0.0277067	2017-18
31449	Gowrie (Qld)	466.427	0.81681	0	2017-18
31450	Highfields	1425.66	0.829019	6.66667e-06	2017-18
31451	Lockyer Valley - West	1035.74	0.869012	0	2017-18
31452	Middle Ridge	654.383	0.908262	0.0271533	2017-18
31453	Newtown (Qld)	575.323	0.796577	0	2017-18
31454	North Toowoomba - Harlaxton	434.119	0.740123	0	2017-18
31455	Rangeville	760.914	0.780133	1.33333e-05	2017-18
31456	Toowoomba - Central	1320.66	0.810474	0	2017-18
31457	Toowoomba - East	841.636	0.791953	0	2017-18
31458	Toowoomba - West	951.109	0.8067	0	2017-18
31459	Wilsonton	1108.06	0.767186	0	2017-18
31460	Ayr	944.987	0.958128	0.0524067	2017-18
31461	Burdekin	599.321	0.961255	0.206913	2017-18
31462	Charters Towers	912.767	0.899701	0.00604667	2017-18
31463	Dalrymple	121.208	0.919424	0.02832	2017-18
31464	Ingham	630.112	0.797636	0	2017-18
31465	Ingham Region	460.333	0.878267	0.00118667	2017-18
31466	Palm Island	3	0.760902	0	2017-18
31467	Aitkenvale	536.328	0.901056	0.00805333	2017-18
31468	Annandale	712.006	0.877982	3.33333e-05	2017-18
31469	Belgian Gardens - Pallarenda	407.254	0.875483	0.000826667	2017-18
31470	Bohle Plains	417.578	1.12099	0.998167	2017-18
31471	Condon - Rasmussen	648.391	1.11068	1	2017-18
31472	Cranbrook	415.909	1.04744	0.876887	2017-18
31473	Deeragun	1062.69	0.954283	0.04958	2017-18
31474	Douglas	303.596	1.01392	0.63964	2017-18
31475	Garbutt - West End	556.707	1.06013	0.968927	2017-18
31476	Gulliver - Currajong - Vincent	479.204	1.05686	0.972693	2017-18
31477	Heatley	250.086	1.07963	0.99876	2017-18
31478	Hermit Park - Rosslea	457.321	1.09591	0.995567	2017-18
31479	Hyde Park - Pimlico	360.845	1.05511	0.904893	2017-18
31480	Kelso	630.536	1.07919	0.994253	2017-18
31481	Kirwan - East	522.363	1.0232	0.755273	2017-18
31482	Kirwan - West	1403.92	1.02212	0.734247	2017-18
31483	Magnetic Island	332.114	1.10999	0.999893	2017-18
31484	Mount Louisa	515.245	0.979251	0.23618	2017-18
31485	Mundingburra	267.817	1.11572	0.993393	2017-18
31486	Northern Beaches	518.133	0.943179	0.0899667	2017-18
31487	Oonoonba	412.543	1.02889	0.855213	2017-18
31488	South Townsville - Railway Estate	337.513	1.02276	0.594913	2017-18
31489	Townsville - South	393.764	1.12179	0.99996	2017-18
31490	Townsville City - North Ward	873.653	0.937152	0.00447333	2017-18
31491	Wulguru - Roseneath	428.433	1.10065	0.99684	2017-18
31492	Ashfield - Kepnock	509.986	1.01656	0.78652	2017-18
31493	Bargara - Burnett Heads	2230.84	0.956126	0.135733	2017-18
31494	Branyan - Kensington	475.08	0.998844	0.488087	2017-18
31495	Bundaberg	1130.71	1.13008	0.999633	2017-18
31496	Bundaberg East - Kalkie	521.217	1.06091	0.996187	2017-18
31497	Bundaberg North - Gooburrum	861.933	1.06592	0.968373	2017-18
31498	Bundaberg Region - North	1113.37	1.03766	0.949927	2017-18
31499	Bundaberg Region - South	1493.52	1.06793	0.99768	2017-18
31500	Millbank - Avoca	707.397	1.0922	0.999807	2017-18
31501	Svensson Heights - Norville	512.941	1.0574	0.886967	2017-18
31502	Walkervale - Avenell Heights	1039.54	1.00249	0.547727	2017-18
31503	Gayndah - Mundubbera	798.123	1.04635	0.95178	2017-18
31504	Gin Gin	733.593	1.0829	0.988327	2017-18
31505	Kingaroy	1194.71	0.913168	0.00032	2017-18
31506	Kingaroy Region - North	1015.48	0.972215	0.204253	2017-18
31507	Kingaroy Region - South	410.443	1.06789	0.957747	2017-18
31508	Monto - Eidsvold	408.691	1.0667	0.980647	2017-18
31509	Nanango	1328.9	0.997125	0.464367	2017-18
31510	North Burnett	3	0.985544	0.443833	2017-18
31511	Cooloola	1190.97	0.888456	0.00058	2017-18
31512	Gympie - North	1514.89	0.734195	0	2017-18
31513	Gympie - South	740.817	0.861543	0	2017-18
31514	Gympie Region	2275.67	0.911849	0.01704	2017-18
31515	Kilkivan	457.118	0.88447	0.00363333	2017-18
31516	Booral - River Heads	567.361	0.824777	3.33333e-05	2017-18
31517	Craignish - Dundowran Beach	677.505	0.882527	0.14928	2017-18
31518	Pialba - Eli Waters	2033.85	0.826763	0	2017-18
31519	Point Vernon	745.162	1.11218	1	2017-18
31520	Torquay - Scarness - Kawungan	1844.83	0.87392	0.13274	2017-18
31521	Urangan - Wondunna	1668.8	1.05241	0.952447	2017-18
31522	Burrum - Fraser	1544.91	1.08432	0.994253	2017-18
31523	Granville	380.334	1.0844	0.96188	2017-18
31524	Maryborough (Qld)	2237.22	1.04226	0.955307	2017-18
31525	Maryborough Region - South	1196.6	0.987158	0.271293	2017-18
31526	Tinana	698.804	1.06444	0.9997	2017-18
31527	Redland Islands	1341.32	0.940713	0.378387	2017-18
31528	Banana	728.835	0.930883	0.00761333	2017-18
31529	Biloela	592.275	1.01439	0.707413	2017-18
31530	Agnes Water - Miriam Vale	911.858	0.931289	0.00592	2017-18
31531	Boyne Island - Tannum Sands	844.59	0.969785	0.128487	2017-18
31532	Callemondah	3	0.943924	0.0546867	2017-18
31533	Clinton - New Auckland	672.208	0.902095	0.00104667	2017-18
31534	Gladstone	339.528	0.916257	0.000953333	2017-18
31535	Gladstone Hinterland	1041.37	0.956856	0.0737133	2017-18
31536	Kin Kora - Sun Valley	344.371	0.975431	0.163567	2017-18
31538	Telina - Toolooa	333.485	0.956324	0.0575533	2017-18
31539	West Gladstone	302.561	0.950727	0.05682	2017-18
31540	Southport - North	3	0.94178	0.00316667	2017-18
31541	Southport - South	2451.4	0.896478	3.33333e-05	2017-18
31542	Scarborough - Newport - Moreton Island	1698.98	0.728437	0	2017-18
31543	Peregian Beach - Marcus Beach	3	0.880418	0.00118667	2017-18
31544	Peregian Springs	1059.98	1.00159	0.518467	2017-18
31545	Bli Bli	896.584	0.881488	2e-05	2017-18
31546	Diddillibah - Rosemount	424.007	0.864115	0.0118933	2017-18
31547	Eumundi - Yandina	1632.93	0.849283	0	2017-18
31548	Nambour	2009.14	0.950141	0.10518	2017-18
31549	Noosa Hinterland	2888.71	0.907027	0.0841867	2017-18
41001	Adelaide	1119.33	1.00836	0.618967	2017-18
41002	North Adelaide	820.03	1.10863	0.99914	2017-18
41003	Adelaide Hills	977.272	1.244	1	2017-18
41004	Aldgate - Stirling	2648.51	1.19315	1	2017-18
41005	Hahndorf - Echunga	614.83	1.19481	1	2017-18
41006	Lobethal - Woodside	1093.87	1.10902	0.999773	2017-18
41007	Mount Barker	2014.51	1.14733	1	2017-18
41008	Mount Barker Region	423.971	1.22418	1	2017-18
41009	Nairne	499.785	1.17234	0.999873	2017-18
41010	Uraidla - Summertown	655.209	1.16687	1	2017-18
41011	Burnside - Wattle Park	2473.66	1.158	1	2017-18
41012	Glenside - Beaumont	1199.14	1.19488	1	2017-18
41013	Toorak Gardens	1957.86	1.18889	1	2017-18
41014	Athelstone	1134.3	1.14661	0.999993	2017-18
41015	Paradise - Newton	1923.03	1.0734	0.999253	2017-18
41016	Rostrevor - Magill	2123.56	1.07939	0.999867	2017-18
41017	Norwood (SA)	1205.44	1.09818	0.999593	2017-18
41018	Payneham - Felixstow	1034.35	1.05512	0.965453	2017-18
41019	St Peters - Marden	1562.78	1.1896	1	2017-18
41020	Nailsworth - Broadview	590.013	1.12391	0.998607	2017-18
41021	Prospect	1364.66	1.06535	0.99218	2017-18
41022	Walkerville	926.458	1.15711	1	2017-18
41023	Goodwood - Millswood	1941.69	1.17816	1	2017-18
41024	Unley - Parkside	2289.55	1.15763	1	2017-18
41025	Gawler - North	880.288	1.11521	0.999607	2017-18
41026	Gawler - South	2183.98	1.08241	0.999947	2017-18
41027	Lewiston - Two Wells	523.682	0.95162	0.108813	2017-18
41028	Craigmore - Blakeview	1425.93	1.06098	0.989593	2017-18
41029	Davoren Park	788.648	0.76728	0	2017-18
41030	Elizabeth	697.909	0.802357	0	2017-18
41031	Elizabeth East	1040.6	0.945248	0.02788	2017-18
41032	Munno Para West - Angle Vale	643.65	0.97592	0.247553	2017-18
41033	One Tree Hill	370.179	1.2633	1	2017-18
41034	Smithfield - Elizabeth North	831.629	0.800986	0	2017-18
41035	Virginia - Waterloo Corner	414.159	0.860459	0.000193333	2017-18
41036	Enfield - Blair Athol	1611.57	0.955781	0.0283533	2017-18
41037	Northgate - Oakden - Gilles Plains	2019.41	1.09116	0.99998	2017-18
41038	Windsor Gardens	1608.02	1.06211	0.9944	2017-18
41040	Ingle Farm	1595.05	1.08831	0.999693	2017-18
41041	Para Hills	1405.09	1.08294	0.99908	2017-18
41042	Parafield	3	1.05831	0.745153	2017-18
41043	Parafield Gardens	1493.1	1.04523	0.959307	2017-18
41044	Paralowie	1213.67	0.952976	0.0389333	2017-18
41046	Salisbury	1470.72	0.949328	0.0168867	2017-18
41047	Salisbury East	1592.67	0.995604	0.426993	2017-18
41048	Salisbury North	1065.61	0.864138	0	2017-18
41049	Golden Grove	1259.06	1.19961	1	2017-18
41050	Greenwith	1018.78	1.10375	0.999973	2017-18
41051	Highbury - Dernancourt	1385.87	1.19994	1	2017-18
41052	Hope Valley - Modbury	1606.89	1.1839	1	2017-18
41053	Modbury Heights	2430.14	1.2105	1	2017-18
41054	Redwood Park	1900.5	1.28587	1	2017-18
41055	St Agnes - Ridgehaven	1594.81	1.19973	1	2017-18
41056	Brighton (SA)	2161.9	1.04777	0.948827	2017-18
41057	Glenelg (SA)	2640.85	1.3067	1	2017-18
41058	Edwardstown	1183.09	1.22921	1	2017-18
41059	Hallett Cove	1765.79	1.12572	1	2017-18
41060	Marino - Seaview Downs	1247.75	1.15386	1	2017-18
41061	Mitchell Park	1390.38	1.2066	1	2017-18
41062	Morphettville	1541.43	1.15836	1	2017-18
41063	Sheidow Park - Trott Park	1031.04	1.19291	1	2017-18
41064	Warradale	1568.03	1.15668	0.999987	2017-18
41065	Belair	624.43	1.24737	1	2017-18
41066	Bellevue Heights	783.956	1.20614	1	2017-18
41067	Blackwood	1649.09	1.21125	1	2017-18
41068	Colonel Light Gardens	1625.95	1.16059	1	2017-18
41069	Mitcham (SA)	2077.65	1.28738	1	2017-18
41070	Panorama	838.312	1.11376	0.999993	2017-18
41071	Aberfoyle Park	1450.04	1.02841	0.811613	2017-18
41072	Aldinga	1520.94	1.04116	0.9151	2017-18
41073	Christie Downs	915.608	1.23471	1	2017-18
41074	Christies Beach	1091.45	1.28334	1	2017-18
41075	Clarendon	439.783	1.27867	1	2017-18
41076	Coromandel Valley	539.623	1.16856	1	2017-18
41077	Flagstaff Hill	1492.64	0.952586	0.079	2017-18
41078	Hackham - Onkaparinga Hills	741.792	1.24876	1	2017-18
41079	Hackham West - Huntfield Heights	675.631	1.1703	0.9329	2017-18
41080	Happy Valley	1658.02	1.2313	1	2017-18
41082	Lonsdale	3	1.1255	1	2017-18
41083	McLaren Vale	880.851	1.05333	0.957147	2017-18
41084	Morphett Vale - East	1545	1.18261	1	2017-18
41085	Morphett Vale - West	981.917	1.15545	1	2017-18
41086	Reynella	1135.77	1.28445	1	2017-18
41087	Seaford (SA)	2234.36	1.23514	1	2017-18
41088	Willunga	256.068	1.04372	0.87934	2017-18
41089	Woodcroft	1267.12	1.1499	1	2017-18
41090	Beverley	673.645	1.20283	1	2017-18
41091	Flinders Park	1491.16	0.979511	0.20138	2017-18
41092	Henley Beach	1903.1	0.974225	0.252113	2017-18
41093	Hindmarsh - Brompton	1496.05	1.08778	0.999893	2017-18
41094	Royal Park - Hendon - Albert Park	525.477	1.19991	1	2017-18
41095	Seaton - Grange	1752.39	0.998969	0.48292	2017-18
41096	West Lakes	2204.58	1.06582	0.995827	2017-18
41097	Woodville - Cheltenham	1494.61	1.05092	0.978953	2017-18
41099	Largs Bay - Semaphore	1667.24	0.890402	0.0001	2017-18
41100	North Haven	1601.77	0.934525	0.00496	2017-18
41101	Port Adelaide	951.673	1.04922	0.694747	2017-18
41102	The Parks	1363.09	1.16906	0.999193	2017-18
41103	Torrens Island	3	1.09606	0.999347	2017-18
41105	Fulham	292.91	1.10615	0.999993	2017-18
41106	Lockleys	1203.04	0.969511	0.11874	2017-18
41107	Plympton	2117.93	1.26033	1	2017-18
41108	Richmond (SA)	1331.81	1.13192	0.99984	2017-18
41109	West Beach	634.651	1.17393	1	2017-18
41110	Barossa - Angaston	738.084	1.27806	1	2017-18
41111	Light	1177.9	1.07828	0.936827	2017-18
41112	Lyndoch	779.632	1.18868	1	2017-18
41113	Mallala	193.604	1.19432	1	2017-18
41114	Nuriootpa	614.795	1.16337	0.999847	2017-18
41115	Tanunda	674.865	1.1743	0.999987	2017-18
41116	Clare	558.087	1.11343	0.994527	2017-18
41117	Gilbert Valley	702.079	1.10171	0.99986	2017-18
41118	Goyder	560.237	1.20793	1	2017-18
41119	Wakefield - Barunga West	1262.52	1.13606	0.999913	2017-18
41120	Jamestown	648.379	0.992046	0.372387	2017-18
41121	Peterborough - Mount Remarkable	772.259	1.1774	0.999367	2017-18
41122	Port Pirie	1594.72	1.12289	0.998867	2017-18
41123	Port Pirie Region	288.284	1.21189	1	2017-18
41124	Kadina	698.233	1.15109	0.99938	2017-18
41125	Moonta	1003.83	1.23512	1	2017-18
41126	Wallaroo	457.877	1.32321	1	2017-18
41127	Yorke Peninsula - North	1215.5	1.00394	0.53056	2017-18
41128	Yorke Peninsula - South	798.09	1.16018	0.99996	2017-18
41129	Ceduna	309.598	1.16864	0.99982	2017-18
41130	Eyre Peninsula	676.032	1.04913	0.799827	2017-18
41131	Kimba - Cleve - Franklin Harbour	533.887	1.11659	1	2017-18
41132	Le Hunte - Elliston	261.615	1.12403	0.99334	2017-18
41133	Port Lincoln	1900.05	0.962903	0.42548	2017-18
41134	West Coast (SA)	372.707	0.99872	0.476353	2017-18
41135	Western	3	0.841892	0.0360667	2017-18
41136	Whyalla	2035.06	1.01611	0.53268	2017-18
41138	APY Lands	3	0.972399	0.309513	2017-18
41139	Coober Pedy	3	0.8239	0.000133333	2017-18
41140	Quorn - Lake Gilles	235.027	0.986086	0.293807	2017-18
41141	Outback	305.448	0.96289	0.181987	2017-18
41142	Port Augusta	1413.89	1.23981	1	2017-18
41143	Roxby Downs	154.853	1.18643	0.999987	2017-18
41144	Goolwa - Port Elliot	2039.05	1.15086	0.99974	2017-18
41145	Kangaroo Island	722.708	1.1488	1	2017-18
41146	Strathalbyn	567.053	1.2814	1	2017-18
41147	Strathalbyn Region	1373.71	1.20035	1	2017-18
41148	Victor Harbor	2718.94	1.08887	0.969067	2017-18
41149	Yankalilla	942.284	1.12498	0.997833	2017-18
41150	Grant	448.494	1.0407	0.870673	2017-18
41151	Kingston - Robe	493.168	0.99741	0.479373	2017-18
41152	Millicent	699.485	1.15845	0.999847	2017-18
41154	Naracoorte	325.017	1.11256	0.98144	2017-18
41155	Naracoorte Region	599.722	1.08026	0.984793	2017-18
41156	Penola	370.862	1.08134	0.9463	2017-18
41157	Tatiara	683.784	1.02299	0.738827	2017-18
41158	Wattle Range	329.047	1.0691	0.964407	2017-18
41159	Barmera	657.42	1.10946	0.962207	2017-18
41160	Berri	645.595	1.11333	0.999367	2017-18
41161	Karoonda - Lameroo	369.34	1.05474	0.992093	2017-18
41162	Loxton	803.597	1.12094	0.977993	2017-18
41163	Loxton Region	167.684	1.04307	0.90678	2017-18
41164	Mannum	861.102	1.13753	0.993727	2017-18
41165	Murray Bridge	1955.36	1.022	0.714653	2017-18
41166	Murray Bridge Region	273.656	1.09093	0.99726	2017-18
41167	Renmark	871.56	0.944728	0.348093	2017-18
41168	Renmark Region	248.106	1.00497	0.57954	2017-18
41169	The Coorong	645.953	1.06494	0.767153	2017-18
41170	Waikerie	910.498	1.08538	1	2017-18
41171	Mawson Lakes - Globe Derby Park	3	1.21617	1	2017-18
41172	Pooraka - Cavan	1495.16	1.19	1	2017-18
41173	Mount Gambier - East	3	1.15392	0.997907	2017-18
41174	Mount Gambier - West	3232.88	1.21687	1	2017-18
51001	Augusta	732.444	1.20993	1	2017-18
51002	Busselton	3440.53	1.21722	1	2017-18
51003	Busselton Region	1286.6	1.27355	1	2017-18
51004	Margaret River	956.163	1.14633	0.999987	2017-18
51005	Australind - Leschenault	1878.41	1.17522	1	2017-18
51007	Capel	659.271	1.12612	0.999493	2017-18
51008	College Grove - Carey Park	547.646	0.983188	0.327427	2017-18
51009	Collie	1014	1.04164	0.9149	2017-18
51010	Dardanup	356.087	1.20359	0.999967	2017-18
51011	Davenport	3	1.06077	0.7107	2017-18
51012	Eaton - Pelican Point	1158.06	1.16537	1	2017-18
51014	Harvey	1013.22	1.08048	0.994533	2017-18
51015	East Bunbury - Glen Iris	708.696	1.05097	0.9226	2017-18
51016	Waroona	441.355	0.995463	0.459033	2017-18
51017	Bridgetown - Boyup Brook	1009.05	1.14066	0.999987	2017-18
51018	Donnybrook - Balingup	847.671	1.1457	1	2017-18
51019	Manjimup	739.907	0.948046	0.0481733	2017-18
51020	Pemberton	748.11	1.1655	1	2017-18
51021	Dawesville - Bouvard	930.646	1.01711	0.736047	2017-18
51022	Falcon - Wannanup	1489.58	1.08662	0.991227	2017-18
51023	Greenfields	922.393	1.11302	1	2017-18
51024	Halls Head - Erskine	2388.65	1.05326	0.968107	2017-18
51025	Mandurah	1356.79	0.953674	0.06954	2017-18
51026	Mandurah - East	790.44	1.18048	1	2017-18
51027	Mandurah - North	1638.71	1.02078	0.742273	2017-18
51028	Mandurah - South	1283.17	1.07392	0.9883	2017-18
51029	Pinjarra	893.569	1.16821	1	2017-18
51030	City Beach	820.515	0.993202	0.408993	2017-18
51031	Claremont (WA)	862.681	1.05301	0.98722	2017-18
51032	Cottesloe	944.761	1.10954	0.999613	2017-18
51033	Floreat	1032.25	0.970002	0.372147	2017-18
51034	Mosman Park - Peppermint Grove	1045.1	1.04031	0.89448	2017-18
51035	Nedlands - Dalkeith - Crawley	1826.28	1.07447	0.99868	2017-18
51036	Swanbourne - Mount Claremont	1023.08	1.0737	0.985513	2017-18
51037	Kings Park (WA)	3	0.845346	0	2017-18
51038	Mount Hawthorn - Leederville	948.708	1.06142	0.995793	2017-18
51039	Mount Lawley - Inglewood	1675	1.1152	0.999987	2017-18
51040	North Perth	816.126	0.976545	0.182827	2017-18
51041	Perth City	2087.83	0.982324	0.213133	2017-18
51042	Subiaco - Shenton Park	1853.5	0.920048	0.0034	2017-18
51043	Wembley - West Leederville - Glendalough	1401.99	0.960342	0.0294667	2017-18
51044	Bassendean - Eden Hill - Ashfield	1332.63	1.02599	0.794493	2017-18
51045	Bayswater - Embleton - Bedford	1876.47	1.08813	0.963653	2017-18
51046	Maylands	885.49	1.14987	0.999993	2017-18
51047	Morley	1997.09	1.08639	0.986067	2017-18
51048	Noranda	967.914	1.04117	0.648107	2017-18
51049	Chidlow	351.977	1.09943	0.99994	2017-18
51050	Glen Forrest - Darlington	988.528	0.975159	0.174153	2017-18
51051	Helena Valley - Koongamia	593.107	0.998198	0.492447	2017-18
51052	Malmalling - Reservoir	3	1.00113	0.51984	2017-18
51053	Mundaring	1678.35	0.90366	9.33333e-05	2017-18
51054	Swan View - Greenmount - Midvale	1264.9	1.02387	0.726367	2017-18
51055	Avon Valley National Park	3	0.968748	0.0771133	2017-18
51056	Ballajura	1709.78	1.04109	0.79858	2017-18
51057	Beechboro	1246.04	0.998994	0.490887	2017-18
51058	Bullsbrook	546.63	0.906209	0.00161333	2017-18
51059	Ellenbrook	1923.77	0.980746	0.40182	2017-18
51060	Gidgegannup	319.797	0.951312	0.0958733	2017-18
51061	Hazelmere - Guildford	380.681	0.908545	0.000786667	2017-18
51062	Lockridge - Kiara	742.172	0.970325	0.215247	2017-18
51063	Malaga	75.0316	1.13753	1	2017-18
51065	Middle Swan - Herne Hill	526.311	1.06326	0.976273	2017-18
51066	Midland - Guildford	909.363	1.12115	0.999987	2017-18
51067	Stratton - Jane Brook	572.448	1.20572	1	2017-18
51068	The Vines	957.651	1.10486	0.999993	2017-18
51070	Craigie - Beldon	903.317	1.10191	0.9997	2017-18
51071	Currambine - Kinross	1333.76	1.20362	1	2017-18
51072	Duncraig	1980.99	1.24453	1	2017-18
51073	Greenwood - Warwick	1661.03	1.11929	1	2017-18
51074	Heathridge - Connolly	1135.23	1.18637	1	2017-18
51075	Hillarys	1546.63	1.20531	1	2017-18
51076	Iluka - Burns Beach	1058.77	1.24985	1	2017-18
51077	Joondalup - Edgewater	1485.79	1.12106	0.999813	2017-18
51078	Kingsley	1645.2	1.21815	1	2017-18
51079	Mullaloo - Kallaroo	1497.95	1.22124	1	2017-18
51080	Ocean Reef	1139.41	1.00939	0.637493	2017-18
51081	Padbury	869.69	0.840419	0	2017-18
51082	Sorrento - Marmion	1539.73	1.03744	0.965373	2017-18
51083	Woodvale	1293.08	1.05578	0.97364	2017-18
51084	Balcatta - Hamersley	1295.27	1.17321	1	2017-18
51085	Balga - Mirrabooka	1351.3	0.890884	0.000133333	2017-18
51086	Dianella	2409.98	1.04608	0.724247	2017-18
51088	Innaloo - Doubleview	1182.22	1.07947	0.996907	2017-18
51089	Karrinyup - Gwelup - Carine	2594.22	1.01738	0.7471	2017-18
51090	Nollamara - Westminster	834.513	1.24322	1	2017-18
51091	Osborne Park Industrial	3	1.00014	0.501713	2017-18
51092	Scarborough	1201.32	1.14836	1	2017-18
51093	Stirling - Osborne Park	1333	1.03951	0.936273	2017-18
51094	Trigg - North Beach - Watermans Bay	993.867	0.971296	0.160253	2017-18
51095	Tuart Hill - Joondanna	794.448	0.957975	0.0552867	2017-18
51096	Wembley Downs - Churchlands - Woodlands	1644.03	0.992926	0.408813	2017-18
51097	Yokine - Coolbinia - Menora	1396.63	0.915275	0.00234	2017-18
51098	Alexander Heights - Koondoola	1075.55	0.850541	6.66667e-06	2017-18
51099	Butler - Merriwa - Ridgewood	1231.47	1.0604	0.99512	2017-18
51100	Carramar	918.707	0.957924	0.0880333	2017-18
51101	Clarkson	864.224	1.14329	1	2017-18
51102	Girrawheen	563.361	0.954003	0.327593	2017-18
51103	Madeley - Darch - Landsdale	1886.35	1.0451	0.924373	2017-18
51104	Marangaroo	889.317	1.064	0.9988	2017-18
51105	Mindarie - Quinns Rocks - Jindalee	1960.41	0.865383	0	2017-18
51106	Neerabup National Park	3	1.03263	0.67624	2017-18
51107	Tapping - Ashby - Sinagra	914.016	0.904446	0.00764	2017-18
51108	Wanneroo	2301.92	1.02264	0.76764	2017-18
51110	Armadale - Wungong - Brookdale	1243.54	0.924742	0.00302	2017-18
51111	Ashendon - Lesley	3	0.953571	0.03782	2017-18
51112	Camillo - Champion Lakes	476.89	0.997124	0.488473	2017-18
51113	Forrestdale - Harrisdale - Piara Waters	922.359	1.0063	0.53086	2017-18
51114	Kelmscott	964.602	0.920411	0.000166667	2017-18
51115	Mount Nasura - Mount Richon - Bedfordale	960.697	0.971509	0.162173	2017-18
51116	Roleystone	969.631	0.934011	0.00823333	2017-18
51117	Seville Grove	556.797	1.07753	0.99578	2017-18
51118	Belmont - Ascot - Redcliffe	1089.02	0.914358	0.00222	2017-18
51119	East Victoria Park - Carlisle	1228.77	1.05741	0.984707	2017-18
51120	Kewdale Commercial	3	1.14685	1	2017-18
51121	Perth Airport	3	0.996537	0.481533	2017-18
51122	Rivervale - Kewdale - Cloverdale	1690.05	1.14541	1	2017-18
51123	Victoria Park - Lathlain - Burswood	1023.76	0.888952	0	2017-18
51124	Bentley - Wilson - St James	1105.66	1.11376	1	2017-18
51125	Canning Vale - West	1175.4	0.861101	0	2017-18
51127	Cannington - Queens Park	917.665	1.00132	0.52042	2017-18
51128	Parkwood - Ferndale - Lynwood	1431.62	0.921548	0.00240667	2017-18
51129	Riverton - Shelley - Rossmoyne	1535.35	0.992891	0.365367	2017-18
51130	Welshpool	44.5922	0.985409	0.27194	2017-18
51131	Willetton	2112.67	0.952836	0.0568533	2017-18
51132	Beckenham - Kenwick - Langford	1386.1	1.16359	1	2017-18
51133	Canning Vale - East	1736.99	1.15879	1	2017-18
51134	Gosnells	1339.83	1.02317	0.77544	2017-18
51135	Huntingdale - Southern River	1403.21	1.05887	0.939013	2017-18
51136	Maddington - Orange Grove - Martin	1047.71	1.09194	0.984647	2017-18
51137	Thornlie	2193.13	1.06021	0.977493	2017-18
51138	Forrestfield - Wattle Grove	1552.7	1.11225	0.999967	2017-18
51139	High Wycombe	960.761	1.03662	0.93992	2017-18
51140	Kalamunda - Maida Vale - Gooseberry Hill	2203.4	1.06742	0.987907	2017-18
51141	Lesmurdie - Bickley - Carmel	1390.89	0.992462	0.457587	2017-18
51142	Byford	982.654	1.06061	0.966473	2017-18
51143	Mundijong	639.335	0.959939	0.10508	2017-18
51144	Serpentine - Jarrahdale	469.632	0.884474	6e-05	2017-18
51145	Como	1065.31	1.02566	0.581853	2017-18
51146	Manning - Waterford	1334.65	1.12048	0.960893	2017-18
51147	South Perth - Kensington	1808.79	0.948903	0.04228	2017-18
51148	Banjup	1091.86	0.976108	0.20318	2017-18
51150	Bibra Industrial	3	1.02405	0.770547	2017-18
51152	Coogee	923.424	0.941344	0.05752	2017-18
51153	Coolbellup	731.196	1.16196	1	2017-18
51154	Hamilton Hill	807.428	1.03348	0.919487	2017-18
51155	Henderson	3	1.01723	0.755927	2017-18
51158	North Coogee	207.28	0.939352	0.27556	2017-18
51159	South Lake - Cockburn Central	978.134	0.933772	0.0282133	2017-18
51160	Spearwood	1005.09	0.769708	0	2017-18
51161	Success - Hammond Park	865.003	0.951598	0.295093	2017-18
51163	Yangebup	553.216	0.880533	0.0893	2017-18
51164	East Fremantle	878.645	1.19699	0.99996	2017-18
51165	Fremantle	1727.11	1.15427	1	2017-18
51166	Fremantle - South	1569.05	1.12815	1	2017-18
51167	O'Connor (WA)	3	1.13563	0.999973	2017-18
51169	Bertram - Wellard (West)	599.031	1.20385	1	2017-18
51170	Calista	424.528	1.14237	1	2017-18
51172	Hope Valley - Postans	3	1.12912	1	2017-18
51173	Kwinana Industrial	3	0.964425	0.225733	2017-18
51174	Parmelia - Orelia	738.308	1.16019	0.999993	2017-18
51175	Applecross - Ardross	1517.22	0.918665	0.00448	2017-18
51176	Bateman	428.85	1.01483	0.689267	2017-18
51177	Bicton - Palmyra	1483.27	1.06405	0.99598	2017-18
51178	Booragoon	1673.02	1.07197	0.830753	2017-18
51179	Bull Creek	998.173	1.12437	0.999993	2017-18
51180	Leeming	1514.89	1.04995	0.965347	2017-18
51181	Melville	1801.17	1.02136	0.773947	2017-18
51182	Murdoch - Kardinya	1511.46	1.00102	0.514167	2017-18
51183	Willagee	340.138	1.17428	1	2017-18
51184	Winthrop	932.37	1.20567	0.999993	2017-18
51185	Baldivis	1890.05	1.18967	1	2017-18
51186	Cooloongup	881.628	1.19706	1	2017-18
51187	Port Kennedy	1035.42	1.06407	0.886713	2017-18
51188	Rockingham	1760.86	0.999685	0.49718	2017-18
51189	Rockingham Lakes	58.9387	1.02027	0.690553	2017-18
51190	Safety Bay - Shoalwater	1372.36	1.27316	1	2017-18
51191	Singleton - Golden Bay - Secret Harbour	1276.55	1.11496	0.999647	2017-18
51192	Waikiki	1171.16	1.13936	0.999847	2017-18
51193	Warnbro	970.835	1.06111	0.935387	2017-18
51225	Albany	2301.26	0.989719	0.41042	2017-18
51226	Albany Region	374.415	0.977636	0.297693	2017-18
51227	Bayonet Head - Lower King	602.596	1.17489	1	2017-18
51228	Denmark	958.036	0.96782	0.216147	2017-18
51229	Gnowangerup	295.178	1.01699	0.661393	2017-18
51230	Katanning	410.736	0.957167	0.19508	2017-18
51231	Kojonup	464.18	0.922023	0.00238	2017-18
51232	Little Grove - Elleker	443.006	1.0899	0.98998	2017-18
51233	McKail - Willyung	943.177	1.08741	0.992553	2017-18
51234	Plantagenet	694.027	1.08296	0.96718	2017-18
51236	Chittering	590.271	1.10933	0.99482	2017-18
51237	Cunderdin	420.721	1.05144	0.83912	2017-18
51238	Dowerin	410.804	1.03161	0.776347	2017-18
51239	Gingin - Dandaragan	1235.38	1.05295	0.909613	2017-18
51240	Merredin	501.633	1.15181	1	2017-18
51241	Moora	500.003	0.969183	0.351167	2017-18
51242	Mukinbudin	291.156	0.897741	0.07866	2017-18
51243	Northam	1052.7	1.11528	1	2017-18
51244	Toodyay	684.853	1.01903	0.5922	2017-18
51245	York - Beverley	778.824	1.00126	0.505427	2017-18
51246	Brookton	455.825	0.994609	0.471787	2017-18
51247	Kulin	496.115	1.01976	0.778773	2017-18
51248	Murray	270.682	0.983691	0.328773	2017-18
51249	Narrogin	502.151	1.11682	0.982287	2017-18
51250	Wagin	571.361	1.02104	0.68684	2017-18
51251	Dalyellup	1120.43	1.19128	1	2017-18
51252	Gelorup - Stratham	3	1.16094	0.999993	2017-18
51253	South Bunbury - Bunbury	3	1.16794	0.999993	2017-18
51254	Withers - Usher	2186.51	1.21705	1	2017-18
51255	Alkimos - Eglinton	3	0.936101	0.0148867	2017-18
51256	Carabooda - Pinjar	3	1.08336	0.996487	2017-18
51257	Two Rocks	3	1.15373	1	2017-18
51258	Yanchep	1394.85	0.87148	0.000206667	2017-18
51259	Beeliar - Wattleup	580.836	0.823292	0	2017-18
51260	Jandakot	354.438	1.09979	0.999907	2017-18
51261	Casuarina - Wandi	372.34	1.02257	0.843107	2017-18
51262	Broome	923.832	0.699536	0	2017-18
51263	Derby - West Kimberley	239.749	0.464	0	2017-18
51264	Halls Creek	63.961	0.429173	0	2017-18
51265	Kununurra	332.795	0.593367	0	2017-18
51266	Roebuck	3	0.579709	0	2017-18
51267	East Pilbara	98.6771	0.612094	0	2017-18
51268	Newman	58.4217	0.587127	0	2017-18
51269	Port Hedland	162.422	0.701391	0	2017-18
51270	South Hedland	256.954	0.477783	0	2017-18
51271	Ashburton (WA)	196.343	0.73933	0	2017-18
51272	Karratha	542.655	0.734353	0	2017-18
51273	Roebourne	166.678	0.68785	0	2017-18
51274	Esperance	1492.42	1.15427	1	2017-18
51275	Esperance Region	273.503	1.0124	0.59274	2017-18
51276	Carnarvon	431.146	0.780863	0	2017-18
51277	Exmouth	293.575	0.938063	0.104687	2017-18
51278	Boulder	384.239	0.691116	0	2017-18
51279	Kalgoorlie	897.388	0.805436	0	2017-18
51280	Kalgoorlie - North	425.232	0.813593	0	2017-18
51281	Kalgoorlie Airport	3	0.738208	0.00667333	2017-18
51282	Kambalda - Coolgardie - Norseman	272.72	0.759102	0	2017-18
51283	Leinster - Leonora	91.785	0.63578	0	2017-18
51285	Geraldton	1677.95	0.985972	0.280393	2017-18
51286	Geraldton - East	557.696	0.880819	0.000593333	2017-18
51287	Geraldton - North	555.97	0.971904	0.23536	2017-18
51288	Geraldton - South	772.547	1.03611	0.84502	2017-18
51289	Irwin	562.902	1.18857	0.99998	2017-18
51290	Meekatharra	167.495	0.763701	0	2017-18
51291	Morawa	455.045	1.03973	0.819773	2017-18
51292	Northampton - Mullewa - Greenough	1039.99	1.02066	0.758467	2017-18
61001	Bridgewater - Gagebrook	482.393	0.773998	0	2017-18
61002	Brighton - Pontville	498.453	0.999303	0.493027	2017-18
61003	Old Beach - Otago	497.073	1.17171	0.999893	2017-18
61004	Bellerive - Rosny	1005.71	1.24143	1	2017-18
61005	Cambridge	1005.03	1.21348	1	2017-18
61006	Geilston Bay - Risdon	411.253	1.23623	0.999987	2017-18
61007	Howrah - Tranmere	1363.37	1.21947	1	2017-18
61008	Lindisfarne - Rose Bay	979.684	1.23041	1	2017-18
61009	Mornington - Warrane	384.6	0.942971	0.0979267	2017-18
61010	Risdon Vale	182.785	0.950034	0.18872	2017-18
61011	Rokeby	470.169	0.96245	0.191713	2017-18
61012	South Arm	592.239	1.22083	1	2017-18
61013	Austins Ferry - Granton	410.007	1.07913	0.945893	2017-18
61014	Berriedale - Chigwell	483.094	0.970357	0.23508	2017-18
61015	Claremont (Tas.)	661.048	0.952057	0.0915	2017-18
61016	Derwent Park - Lutana	337.805	0.914886	0.0354467	2017-18
61017	Glenorchy	998.166	0.968964	0.145427	2017-18
61018	Montrose - Rosetta	537.672	1.07756	0.963153	2017-18
61019	Moonah	520.887	0.962785	0.168853	2017-18
61020	New Norfolk	782.24	0.998587	0.483353	2017-18
61021	West Moonah	351.946	1.04707	0.824973	2017-18
61022	Kingston - Huntingfield	1342.31	1.2015	1	2017-18
61023	Kingston Beach - Blackmans Bay	1441.43	1.2675	1	2017-18
61024	Margate - Snug	923.678	1.24647	1	2017-18
61026	Taroona - Bonnet Hill	530.693	1.31486	1	2017-18
61027	Hobart	1010.86	1.05163	0.954353	2017-18
61028	Lenah Valley - Mount Stuart	915.341	1.14239	0.999987	2017-18
61029	Mount Nelson - Dynnyrne	566.941	1.26336	1	2017-18
61030	New Town	583.602	1.1186	0.998067	2017-18
61031	Sandy Bay	1438.4	1.22076	1	2017-18
61032	South Hobart - Fern Tree	728.966	1.24487	1	2017-18
61033	West Hobart	704.966	1.18711	1	2017-18
61034	Dodges Ferry - Lewisham	888.863	1.10691	0.998913	2017-18
61035	Sorell - Richmond	1056.08	1.03982	0.91062	2017-18
61036	Invermay	222.861	0.838509	0.00236	2017-18
61037	Kings Meadows - Punchbowl	431.252	1.10017	0.98578	2017-18
61038	Launceston	877.448	1.18293	1	2017-18
61039	Legana	521.911	1.23453	1	2017-18
[truncated: 248 more rows]

## Sheet: 2015-16
SA2	SA2name	Count	SPR	PP	period
11007	Braidwood	287.781	1.00755	0.565387	2015-16
11008	Karabar	432.909	0.860305	0.0002	2015-16
11009	Queanbeyan	406.156	0.899357	0.0062	2015-16
11010	Queanbeyan - East	198.34	0.957732	0.214073	2015-16
11011	Queanbeyan Region	1018.23	1.07404	0.995333	2015-16
11012	Queanbeyan West - Jerrabomberra	648.697	1.07735	0.98008	2015-16
11013	Bombala	186.595	1.10719	0.964547	2015-16
11014	Cooma	518.936	1.05281	0.883533	2015-16
11015	Cooma Region	218.676	1.02911	0.728827	2015-16
11016	Jindabyne - Berridale	381.297	1.05943	0.897727	2015-16
11017	Batemans Bay	668.581	1.00217	0.523307	2015-16
11018	Batemans Bay - South	696.271	1.06657	0.962473	2015-16
11019	Bega - Tathra	771.973	1.13301	0.999813	2015-16
11020	Bega-Eden Hinterland	776.047	1.09851	0.997873	2015-16
11021	Broulee - Tomakin	248.644	1.1153	0.974873	2015-16
11022	Deua - Wadbilliga	3	1.05128	0.739273	2015-16
11023	Eden	289.732	1.04778	0.805573	2015-16
11024	Eurobodalla Hinterland	269.48	1.04348	0.829987	2015-16
11025	Merimbula - Tura Beach	1036.8	1.15236	1	2015-16
11026	Moruya - Tuross Head	793.019	1.08783	0.992053	2015-16
11027	Narooma - Bermagui	968.763	1.11077	0.999573	2015-16
11028	Avoca Beach - Copacabana	498.846	0.947162	0.0967333	2015-16
11029	Box Head - MacMasters Beach	815.753	0.945557	0.09734	2015-16
11030	Calga - Kulnura	312.562	0.938319	0.0352333	2015-16
11031	Erina - Green Point	973.251	0.968866	0.205513	2015-16
11032	Gosford - Springfield	788.504	0.957385	0.14194	2015-16
11033	Kariong	324.547	1.05086	0.944653	2015-16
11034	Kincumber - Picketts Valley	476.419	0.897326	6.66667e-06	2015-16
11035	Narara	411.724	1.00388	0.543407	2015-16
11036	Niagara Park - Lisarow	470.099	0.896247	0.000146667	2015-16
11037	Point Clare - Koolewong	442.152	0.86002	2.66667e-05	2015-16
11038	Saratoga - Davistown	437.743	0.936093	0.00670667	2015-16
11039	Terrigal - North Avoca	929.576	0.857346	4.66667e-05	2015-16
11040	Umina - Booker Bay - Patonga	1480.95	0.929552	0.0295933	2015-16
11041	Wamberal - Forresters Beach	659.959	0.94592	0.0320467	2015-16
11042	Woy Woy - Blackwall	881.409	0.874937	0	2015-16
11043	Wyoming	625.164	0.96589	0.270773	2015-16
11044	Bateau Bay - Killarney Vale	1317.61	0.925794	0.0148867	2015-16
11045	Blue Haven - San Remo	535.447	0.959407	0.183593	2015-16
11046	Budgewoi - Buff Point - Halekulani	573.724	0.985576	0.37166	2015-16
11047	Chittaway Bay - Tumbi Umbi	993.939	0.880695	2e-05	2015-16
11048	Gorokan - Kanwal - Charmhaven	1207.66	0.888136	0.00118	2015-16
11049	Jilliby - Yarramalong	198.653	0.93845	0.07472	2015-16
11050	Lake Munmorah - Mannering Park	700.866	0.943321	0.05048	2015-16
11051	Ourimbah - Fountaindale	306.045	0.838029	6.66667e-06	2015-16
11052	Summerland Point - Gwandalan	431.169	0.988379	0.32918	2015-16
11053	The Entrance	752.361	0.996818	0.47002	2015-16
11054	Toukley - Norah Head	546.633	1.03654	0.79098	2015-16
11055	Tuggerah - Kangy Angy	288.116	0.916037	0.0339133	2015-16
11056	Warnervale - Wadalba	640.915	0.824159	2.66667e-05	2015-16
11057	Wyong	438.223	0.969536	0.206353	2015-16
11058	Bathurst	1369.48	0.936282	0.08878	2015-16
11059	Bathurst - East	481.66	0.985415	0.350547	2015-16
11060	Bathurst Region	457.965	0.975333	0.276353	2015-16
11061	Oberon	314.429	0.971667	0.238767	2015-16
11062	Condobolin	342.83	0.980752	0.32482	2015-16
11063	Cowra	593.012	0.893543	0.0168533	2015-16
11064	Cowra Region	352.42	0.899138	0.00028	2015-16
11065	Forbes	613.152	1.0052	0.556187	2015-16
11066	Grenfell	276.856	0.944452	0.0547067	2015-16
11067	Parkes (NSW)	463.239	0.943535	0.14284	2015-16
11068	Parkes Region	352.269	0.982651	0.306227	2015-16
11069	West Wyalong	311.071	0.973149	0.24606	2015-16
11070	Lithgow	784.71	0.942733	0.0214867	2015-16
11071	Lithgow Region	553.758	1.02063	0.7495	2015-16
11072	Mudgee	661.339	1.06748	0.960567	2015-16
11073	Mudgee Region - East	276.767	1.03812	0.921367	2015-16
11074	Mudgee Region - West	674.301	0.999321	0.48948	2015-16
11076	Blayney	441.837	1.0251	0.834067	2015-16
11077	Orange	1111.16	1.01325	0.617587	2015-16
11078	Orange - North	961.998	0.97801	0.222653	2015-16
11079	Orange Region	713.591	0.977931	0.253767	2015-16
11080	Grafton	1302.37	0.978058	0.343493	2015-16
11081	Grafton Region	1263.58	0.982558	0.342233	2015-16
11082	Maclean - Yamba - Iluka	1460.24	1.04634	0.891687	2015-16
11083	Bellingen	464.726	1.02079	0.793993	2015-16
11084	Coffs Harbour - North	1116.57	0.970901	0.267	2015-16
11085	Coffs Harbour - South	588.27	1.053	0.946067	2015-16
11086	Coramba - Nana Glen - Bucca	300.888	0.744017	0	2015-16
11087	Dorrigo	287.172	0.822301	0.000233333	2015-16
11088	Korora - Emerald Beach	673.967	0.831521	0.00058	2015-16
11089	Sawtell - Boambee	1405.43	0.849703	0.000493333	2015-16
11090	Urunga	361.088	0.686033	0	2015-16
11091	Woolgoolga - Arrawarra	908.308	0.862899	0	2015-16
11092	Bourke - Brewarrina	153.679	0.853127	0.0009	2015-16
11093	Cobar	194.297	0.91367	0.0102	2015-16
11094	Coonamble	211.277	0.899981	0.00396	2015-16
11095	Nyngan - Warren	281.488	0.942731	0.0220067	2015-16
11096	Walgett - Lightning Ridge	324.78	0.911208	0.0173733	2015-16
11097	Broken Hill	907.551	0.905044	0.0472133	2015-16
11098	Far West	208.061	0.942041	0.0989267	2015-16
11099	Coonabarabran	521.75	0.926457	0.0312667	2015-16
11100	Dubbo - East	447.819	0.84212	2.66667e-05	2015-16
11101	Dubbo - South	990.914	1.00514	0.5507	2015-16
11102	Dubbo - West	337.187	0.892005	4.66667e-05	2015-16
11103	Dubbo Region	244.954	0.960582	0.131987	2015-16
11104	Gilgandra	246.523	1.07595	0.977807	2015-16
11105	Narromine	364.773	0.946612	0.0341667	2015-16
11106	Wellington	445.392	0.932064	0.0237733	2015-16
11107	Branxton - Greta - Pokolbin	535.904	0.991211	0.428407	2015-16
11108	Cessnock	1013.97	0.947102	0.143787	2015-16
11109	Cessnock Region	491.446	1.02459	0.851853	2015-16
11110	Dungog	651.234	1.08531	0.98188	2015-16
11111	Kurri Kurri - Abermain	925.263	0.960463	0.08674	2015-16
11112	Singleton	695.949	1.05201	0.887147	2015-16
11113	Singleton Region	251.719	1.02827	0.760453	2015-16
11114	Maitland	290.804	1.01809	0.676887	2015-16
11115	Maitland - East	1498.75	1.11937	1	2015-16
11116	Maitland - North	445.436	0.941247	0.0343933	2015-16
11117	Maitland - West	995.323	1.15878	0.999747	2015-16
11118	Thornton - Millers Forest	529.311	1.17565	0.999993	2015-16
11119	Anna Bay	417.185	1.00291	0.534893	2015-16
11120	Lemon Tree Passage - Tanilba Bay	520.238	0.922816	0.0206733	2015-16
11121	Nelson Bay Peninsula	1817.29	0.894071	0.03704	2015-16
11122	Raymond Terrace	755.605	0.951768	0.14166	2015-16
11123	Seaham - Woodville	403.896	0.961436	0.162367	2015-16
11124	Tea Gardens - Hawks Nest	557.966	0.964951	0.0872533	2015-16
11125	Williamtown - Medowie - Karuah	809.43	0.949343	0.09982	2015-16
11126	Muswellbrook	556.997	0.974832	0.422693	2015-16
11127	Muswellbrook Region	192.054	0.990284	0.377727	2015-16
11128	Scone	351.771	0.982813	0.461727	2015-16
11129	Scone Region	458.136	1.05302	0.95054	2015-16
11131	Dapto - Avondale	1377.62	0.941539	0.0839933	2015-16
11132	Horsley - Kembla Grange	376.989	1.0469	0.885093	2015-16
11133	Port Kembla Industrial	3	1.0558	0.9025	2015-16
11134	Unanderra - Mount Kembla	908.269	1.04726	0.895707	2015-16
11135	Illawarra Catchment Reserve	3	0.945343	0.01136	2015-16
11136	Albion Park - Macquarie Pass	737.281	0.924892	0.0063	2015-16
11137	Albion Park Rail	374.471	0.998446	0.476153	2015-16
11138	Kiama	571.892	0.991802	0.426947	2015-16
11139	Kiama Downs - Minnamurra	438.507	1.14521	0.999967	2015-16
11140	Kiama Hinterland - Gerringong	581.832	1.04645	0.950727	2015-16
11141	Shellharbour - Flinders	907.402	1.01005	0.58774	2015-16
11142	Shellharbour - Oak Flats	638.691	1.12392	0.999987	2015-16
11143	Warilla	1279.09	1.07105	0.960833	2015-16
11144	Balgownie - Fairy Meadow	1171.35	1.06215	0.928213	2015-16
11145	Corrimal - Tarrawanna - Bellambi	821.175	0.872101	0	2015-16
11146	Figtree - Keiraville	1356.67	1.00276	0.530407	2015-16
11147	Helensburgh	438.548	0.951137	0.13578	2015-16
11148	Thirroul - Austinmer - Coalcliff	826.143	0.984863	0.349767	2015-16
11150	Woonona - Bulli - Russell Vale	1194.71	0.976973	0.272233	2015-16
11151	Bulahdelah - Stroud	345.278	1.04912	0.988053	2015-16
11152	Forster	1368.62	0.975185	0.196113	2015-16
11153	Forster-Tuncurry Region	614.162	0.975172	0.279847	2015-16
11154	Tuncurry	450.05	1.01542	0.66902	2015-16
11155	Kempsey	858.108	1.12729	0.995433	2015-16
11156	Kempsey Region	672.966	1.09449	0.99876	2015-16
11157	Macksville - Scotts Head	352.005	1.03708	0.922447	2015-16
11158	Nambucca Heads	551.231	1.11096	0.99994	2015-16
11159	Nambucca Heads Region	586.681	1.01315	0.617767	2015-16
11160	South West Rocks	493.563	1.12904	0.999653	2015-16
11162	Laurieton - Bonny Hills	1494.35	0.984072	0.344273	2015-16
11163	Port Macquarie - East	2091.41	1.11316	0.999313	2015-16
11164	Port Macquarie - West	1094.62	1.01608	0.678387	2015-16
11165	Port Macquarie Region	391.507	0.982103	0.27852	2015-16
11166	Wauchope	755.48	0.922746	0.0839933	2015-16
11167	Gloucester	457.503	1.0349	0.77882	2015-16
11168	Old Bar - Manning Point - Red Head	931.972	0.93832	0.129253	2015-16
11169	Taree	1457.41	1.1003	0.98352	2015-16
11170	Taree Region	1245.71	1.03033	0.793613	2015-16
11171	Wingham	394.225	0.994945	0.459807	2015-16
11172	Albury - East	790.588	1.04301	0.870773	2015-16
11173	Albury - North	504.615	1.13778	0.999	2015-16
11174	Albury - South	818.156	1.02959	0.807853	2015-16
11175	Albury Region	755.46	1.08255	0.999407	2015-16
11176	Lavington	899.508	1.11229	0.981473	2015-16
11177	Hay	176.599	1.02604	0.727993	2015-16
11178	Wentworth - Buronga	367.326	1.02021	0.6527	2015-16
11179	Wentworth-Balranald Region	224.083	0.960029	0.110933	2015-16
11180	Corowa	432.225	0.92683	0.0168533	2015-16
11181	Corowa Region	522.002	0.990102	0.40656	2015-16
11182	Deniliquin	353.554	0.961299	0.215113	2015-16
11183	Deniliquin Region	559.556	0.841627	6.66667e-06	2015-16
11184	Moama	492.229	0.761212	0	2015-16
11185	Tocumwal - Finley - Jerilderie	744.264	0.823053	4.66667e-05	2015-16
11186	Armidale	1396.17	0.900943	0.0243267	2015-16
11187	Armidale Region - North	311.586	0.877379	0.000693333	2015-16
11188	Armidale Region - South	450.596	0.926335	0.0280467	2015-16
11189	Walcha	249.189	0.98367	0.357573	2015-16
11190	Glen Innes	627.25	0.958345	0.141867	2015-16
11191	Inverell	717.034	0.996688	0.45422	2015-16
11192	Inverell Region - East	320.088	0.993763	0.415487	2015-16
11193	Inverell Region - West	366.936	0.918882	0.0491533	2015-16
11194	Tenterfield	434.86	1.00765	0.615407	2015-16
11195	Moree	377.24	1.0677	0.98732	2015-16
11196	Moree Region	219.804	1.06214	0.932507	2015-16
11197	Narrabri	288.92	1.0739	0.99666	2015-16
11198	Narrabri Region	340.572	1.03429	0.913347	2015-16
11199	Gunnedah	479.359	0.890163	0.00498667	2015-16
11200	Gunnedah Region	258.997	1.03964	0.77098	2015-16
11201	Quirindi	507.492	1.11496	0.9997	2015-16
11202	Tamworth - East	1128.23	1.21725	1	2015-16
11203	Tamworth - North	923.903	1.08117	0.99322	2015-16
11204	Tamworth - West	237.388	1.00747	0.574053	2015-16
11205	Tamworth Region	1250.05	1.07537	0.986833	2015-16
11206	Belmont - Bennetts Green	1163.58	1.00893	0.597993	2015-16
11207	Belmont South - Blacksmiths	399.212	0.977312	0.235567	2015-16
11208	Charlestown - Dudley	1462.97	1.07466	0.993407	2015-16
11209	Glendale - Cardiff - Hillsborough	1430.75	1.1173	0.999807	2015-16
11210	Mount Hutton - Windale	450.26	1.05881	0.903187	2015-16
11211	Redhead	229.762	1.0564	0.95316	2015-16
11212	Swansea - Caves Beach	924.484	0.994246	0.445687	2015-16
11213	Valentine - Eleebana	1128.93	0.983238	0.317947	2015-16
11214	Warners Bay - Boolaroo	952.821	1.06709	0.9829	2015-16
11215	Bolton Point - Teralba	549.965	1.021	0.718893	2015-16
11216	Bonnells Bay - Silverwater	643.374	0.832454	0	2015-16
11217	Edgeworth - Cameron Park	620.586	1.10436	0.99918	2015-16
11218	Morisset - Cooranbong	952.561	0.999617	0.495773	2015-16
11219	Toronto - Awaba	1038.33	1.00307	0.512747	2015-16
11220	Wangi Wangi - Rathmines	826.2	0.952481	0.151213	2015-16
11221	West Wallsend - Barnsley - Killingworth	388.443	1.11982	0.999107	2015-16
11222	Adamstown - Kotara	882.736	1.03426	0.888987	2015-16
11223	Beresfield - Hexham	533.171	0.942108	0.0587267	2015-16
11224	Hamilton - Broadmeadow	687.987	0.922805	0.0265467	2015-16
11225	Lambton - New Lambton	978.799	1.00778	0.609893	2015-16
11226	Maryland - Fletcher - Minmi	645.926	1.06775	0.992893	2015-16
11227	Mayfield - Warabrook	639.165	1.04056	0.824533	2015-16
11228	Merewether - The Junction	869.763	0.983628	0.331013	2015-16
11229	Newcastle - Cooks Hill	612.368	0.937648	0.0347933	2015-16
11230	Newcastle Port - Kooragang	3	0.96605	0.233967	2015-16
11231	Shortland - Jesmond	391.597	1.03534	0.83198	2015-16
11232	Stockton - Fullerton Cove	630.141	0.911072	0.00896	2015-16
11233	Wallsend - Elermore Vale	1199.45	0.99236	0.407667	2015-16
11234	Waratah - North Lambton	536.986	0.986432	0.371633	2015-16
11235	Wickham - Carrington - Tighes Hill	383.034	1.02333	0.752393	2015-16
11236	Ballina	1144.7	0.958969	0.153127	2015-16
11237	Ballina Region	1262.12	0.925108	0.00435333	2015-16
11238	Bangalow	416.999	1.00731	0.602453	2015-16
11239	Brunswick Heads - Ocean Shores	579.559	0.973093	0.20524	2015-16
11240	Byron Bay	686.23	0.920092	0.0142667	2015-16
11241	Evans Head	353.884	0.986286	0.34718	2015-16
11242	Lennox Head - Skennars Head	606.443	1.00973	0.618567	2015-16
11243	Mullumbimby	570.711	0.966776	0.0945267	2015-16
11244	Casino	768.947	0.90652	0.00104667	2015-16
11245	Casino Region	460.428	0.907669	0.00373333	2015-16
11246	Goonellabah	776.021	0.901914	0.00654	2015-16
11247	Kyogle	529.28	0.922198	0.0271333	2015-16
11248	Lismore	961.407	0.933426	0.1188	2015-16
11249	Lismore Region	1132.94	0.955468	0.117427	2015-16
11250	Kingscliff - Fingal Head	802.282	1.05299	0.856567	2015-16
11251	Murwillumbah	567.876	1.06241	0.93448	2015-16
11252	Murwillumbah Region	709.128	0.926902	0.04276	2015-16
11253	Pottsville	884.195	0.92208	0.046	2015-16
11254	Tweed Heads	1367.04	0.993665	0.438787	2015-16
11256	Griffith (NSW)	917.853	0.919972	0.0227333	2015-16
11257	Griffith Region	558.39	0.920168	0.00396667	2015-16
11258	Leeton	503.294	1.10698	0.99844	2015-16
11259	Narrandera	367.674	1.08205	0.964047	2015-16
11260	Tumbarumba	228.484	1.08801	0.980713	2015-16
11261	Tumut	429.937	1.03468	0.57508	2015-16
11262	Tumut Region	323.609	1.11658	0.99484	2015-16
11263	Cootamundra	607.602	1.04263	0.931753	2015-16
11264	Gundagai	217.993	0.897668	0.00012	2015-16
11265	Junee	309.663	1.02347	0.787193	2015-16
11266	Temora	430.831	1.04276	0.837953	2015-16
11267	Wagga Wagga - East	1014.6	1.02068	0.65438	2015-16
11268	Wagga Wagga - North	147.211	1.10245	0.99994	2015-16
11269	Wagga Wagga - South	1080.04	1.13183	0.998467	2015-16
11270	Wagga Wagga - West	526.782	0.988931	0.347253	2015-16
11271	Wagga Wagga Region	743.019	0.949412	0.0949933	2015-16
11272	Berry - Kangaroo Valley	815.435	0.979427	0.279333	2015-16
11273	Callala Bay - Currarong	339.431	0.919669	0.0129467	2015-16
11274	Culburra Beach	448.651	0.963671	0.238627	2015-16
11275	Ettrema - Sassafras - Budawang	3	1.01525	0.65902	2015-16
11276	Huskisson - Vincentia	397.295	0.981656	0.25522	2015-16
11277	North Nowra - Bomaderry	1155.09	0.968533	0.110487	2015-16
11278	Nowra	980.867	1.05083	0.876027	2015-16
11279	St Georges Basin - Erowal Bay	1088	0.967355	0.140107	2015-16
11280	Sussex Inlet - Berrara	399.135	0.90499	6.66667e-05	2015-16
11281	Tomerong - Wandandian - Woollamia	266.788	0.967382	0.207553	2015-16
11282	Ulladulla	1368.71	0.963508	0.295207	2015-16
11283	Ulladulla Region	510.64	0.97123	0.129787	2015-16
11284	Bowral	1100.24	0.851717	2.66667e-05	2015-16
11285	Hill Top - Colo Vale	309.827	0.902485	0.0004	2015-16
11286	Mittagong	629.612	0.790103	0	2015-16
11287	Moss Vale - Berrima	589.147	0.766421	0	2015-16
11288	Robertson - Fitzroy Falls	251.509	0.800515	0	2015-16
11289	Southern Highlands	533.934	0.848056	0	2015-16
11290	Baulkham Hills (East)	1150.58	0.854016	0	2015-16
11291	Baulkham Hills (West) - Bella Vista	1345.99	0.843997	0	2015-16
11294	Glenhaven	438.583	0.838829	0	2015-16
11296	West Pennant Hills	947.137	0.854728	6.66667e-06	2015-16
11297	Dural - Kenthurst - Wisemans Ferry	1305.32	0.834688	0.0007	2015-16
11298	Galston - Laughtondale	351.028	0.828445	2e-05	2015-16
11299	Bilpin - Colo - St Albans	177.925	0.836013	0	2015-16
11300	Kurrajong Heights - Ebenezer	1342.87	0.800753	0	2015-16
11301	Pitt Town - McGraths Hill	504.908	0.78938	0.00306	2015-16
11302	Rouse Hill - Beaumont Hills	902.832	0.794861	0.00162667	2015-16
11303	Blacktown (East) - Kings Park	538.516	0.84006	0	2015-16
11304	Blacktown (North) - Marayong	752.167	0.893021	0.00018	2015-16
11306	Doonside - Woodcroft	924.565	0.815293	1.33333e-05	2015-16
11307	Lalor Park - Kings Langley	1199.87	0.823282	0	2015-16
11308	Seven Hills - Toongabbie	1127.51	0.953685	0.0928533	2015-16
11309	Glenwood	647.296	0.784516	0	2015-16
11310	Parklea - Kellyville Ridge	829.89	0.856686	0	2015-16
11312	Riverstone - Marsden Park	608.021	0.737582	0	2015-16
11313	Bidwill - Hebersham - Emerton	644.588	0.712624	0	2015-16
11314	Glendenning - Dean Park	233.817	0.828976	0	2015-16
11315	Hassall Grove - Plumpton	668.993	0.806959	0	2015-16
11316	Lethbridge Park - Tregear	599.821	0.795989	0	2015-16
11317	Mount Druitt - Whalan	653.967	0.756529	0	2015-16
11318	Prospect Reservoir	3	0.800245	0	2015-16
11319	Rooty Hill - Minchinbury	839.727	0.806515	0	2015-16
11320	Banksmeadow	3	0.751366	0	2015-16
11321	Botany	396.9	0.794551	0	2015-16
11322	Mascot - Eastlakes	909.252	0.861019	0	2015-16
11323	Pagewood - Hillsdale - Daceyville	474.446	0.858826	0	2015-16
11324	Port Botany Industrial	3	0.815557	0	2015-16
11325	Sydney Airport	3	0.904339	0.11496	2015-16
11326	Marrickville	1151.3	0.788929	0	2015-16
11327	Petersham - Stanmore	831.213	0.700202	0	2015-16
11328	Sydenham - Tempe - St Peters	324.1	0.914285	0.00154667	2015-16
11329	Darlinghurst	403.202	0.912801	0.00026	2015-16
11330	Erskineville - Alexandria	579.336	0.87946	4.66667e-05	2015-16
11331	Glebe - Forest Lodge	748.658	0.852422	0	2015-16
11332	Newtown - Camperdown - Darlington	784.811	0.781571	0	2015-16
11333	Potts Point - Woolloomooloo	710.993	0.796649	0	2015-16
11334	Pyrmont - Ultimo	668.836	0.82284	0	2015-16
11335	Redfern - Chippendale	566.232	0.73832	0	2015-16
11336	Surry Hills	581.784	0.793219	0	2015-16
11337	Sydney - Haymarket - The Rocks	840.266	0.830148	0	2015-16
11338	Waterloo - Beaconsfield	727.643	0.946575	0.0232933	2015-16
11339	Bondi - Tamarama - Bronte	651.668	0.884676	0.00022	2015-16
11340	Bondi Beach - North Bondi	652.753	0.995214	0.440567	2015-16
11341	Bondi Junction - Waverly	688.352	0.912468	0.00044	2015-16
11343	Double Bay - Bellevue Hill	1135.43	0.852115	6.66667e-06	2015-16
11344	Dover Heights	448.833	0.870338	0	2015-16
11345	Paddington - Moore Park	638.59	0.796891	0	2015-16
11346	Rose Bay - Vaucluse - Watsons Bay	569.681	0.81405	0	2015-16
11347	Woollahra	373.798	0.875819	9.33333e-05	2015-16
11348	Coogee - Clovelly	1069.21	0.859043	7.33333e-05	2015-16
11350	Malabar - La Perouse - Chifley	1233.56	0.857403	0	2015-16
11354	Bass Hill - Georges Hall	1003.25	0.935101	0.0109133	2015-16
11355	Chullora	3	0.90886	0.00012	2015-16
11356	Condell Park	523.108	0.892766	0.00036	2015-16
11357	Greenacre - Mount Lewis	894.846	0.847368	0	2015-16
11358	Padstow	898.921	0.843529	0	2015-16
11359	Panania - Milperra - Picnic Point	1319.43	0.879105	0.000313333	2015-16
11360	Revesby	778.081	0.834799	0	2015-16
11361	Yagoona - Birrong	911.394	0.899683	0.000546667	2015-16
11362	Belmore - Belfield	841.152	0.878082	0	2015-16
11363	Canterbury (South) - Campsie	1234.06	0.950649	0.04834	2015-16
11364	Kingsgrove (North) - Earlwood	1230.56	0.998582	0.475433	2015-16
11366	Punchbowl	756.544	0.95371	0.1174	2015-16
11367	Roselands	618.567	0.997212	0.452133	2015-16
11368	Hurstville	1055.7	1.00902	0.627627	2015-16
11369	Mortdale - Penshurst	1144.55	0.976179	0.177513	2015-16
11370	Narwee - Beverly Hills	704.001	1.00615	0.59566	2015-16
11371	Oatley - Hurstville Grove	876.368	0.988268	0.348527	2015-16
11372	Peakhurst - Lugarno	1135.71	0.970675	0.13132	2015-16
11373	Riverwood	456.941	0.99979	0.49678	2015-16
11374	South Hurstville - Blakehurst	1149.76	1.00813	0.614587	2015-16
11375	Arncliffe - Bardwell Valley	644.409	0.977324	0.200267	2015-16
11376	Bexley	1131.85	0.95384	0.0796733	2015-16
11377	Kingsgrove (South) - Bardwell Park	703.573	0.929024	0.00062	2015-16
11378	Kogarah	418.441	0.89169	4e-05	2015-16
11379	Kogarah Bay - Carlton - Allawah	772.005	0.95106	0.0877133	2015-16
11380	Monterey - Brighton-le-Sands - Kyeemagh	610.603	1.04969	0.964193	2015-16
11381	Rockdale - Banksia	755.95	1.0287	0.84306	2015-16
11382	Sans Souci - Ramsgate	885.588	1.0053	0.56904	2015-16
11383	Concord - Mortlake - Cabarita	1166.25	0.993995	0.425933	2015-16
11384	Concord West - North Strathfield	840.492	1.02511	0.796833	2015-16
11385	Drummoyne - Rodd Point	1033.85	1.01439	0.71934	2015-16
11386	Five Dock - Abbotsford	989.963	0.962726	0.108767	2015-16
11387	Balmain	947.957	1.02063	0.691733	2015-16
11388	Leichhardt - Annandale	1188.15	0.952351	0.0452133	2015-16
11389	Lilyfield - Rozelle	698.337	1.03494	0.8436	2015-16
11390	Ashfield	979.427	1.04752	0.974913	2015-16
11391	Burwood - Croydon	1010.48	0.999412	0.492153	2015-16
11392	Canterbury (North) - Ashbury	546.399	1.00219	0.529247	2015-16
11393	Croydon Park - Enfield	859.534	1.03013	0.87024	2015-16
11394	Dulwich Hill - Lewisham	779.105	0.9032	0.01744	2015-16
11395	Haberfield - Summer Hill	681.592	0.941306	0.03334	2015-16
11396	Homebush	411.61	0.89066	0.000206667	2015-16
11398	Chatswood (East) - Artarmon	1129.7	0.77985	0	2015-16
11399	Chatswood (West) - Lane Cove North	952.613	0.769834	0	2015-16
11400	Lane Cove - Greenwich	1513.41	0.841765	0	2015-16
11401	St Leonards - Naremburn	431.292	0.858959	0	2015-16
11402	Willoughby - Castle Cove - Northbridge	1587.61	0.773222	0	2015-16
11403	Asquith - Mount Colah	1193.15	0.792922	0	2015-16
11404	Berowra - Brooklyn - Cowan	763.104	0.81628	0	2015-16
11406	Normanhurst - Thornleigh - Westleigh	1110.29	0.917166	0.02546	2015-16
11407	Gordon - Killara	1299.68	0.947139	0.0922667	2015-16
11408	Lindfield - Roseville	1376.01	1.07855	0.99818	2015-16
11409	Pymble	1011.38	0.922778	0.200387	2015-16
11410	St Ives	1316.66	0.871302	0	2015-16
11411	Turramurra	1201.77	0.991097	0.392527	2015-16
11412	Wahroonga (East) - Warrawee	1159.92	1.03368	0.9032	2015-16
11413	Cremorne - Cammeray	1116.6	0.965448	0.194887	2015-16
11414	Crows Nest - Waverton	700.511	0.883211	0.0698467	2015-16
11415	Mosman	1734.72	0.811771	0	2015-16
11416	Neutral Bay - Kirribilli	928.66	0.872317	1.33333e-05	2015-16
11417	North Sydney - Lavender Bay	580.98	0.932947	0.0169333	2015-16
11418	Balgowlah - Clontarf - Seaforth	1276.02	0.862302	6.66667e-06	2015-16
11419	Manly - Fairlight	1183.61	0.8959	0.000273333	2015-16
11420	Avalon - Palm Beach	997.98	0.779245	0	2015-16
11421	Bayview - Elanora Heights	851.18	0.972231	0.26904	2015-16
11422	Newport - Bilgola	1019.84	0.749389	0	2015-16
11423	Warriewood - Mona Vale	1648.23	1.00918	0.56604	2015-16
11424	Beacon Hill - Narraweena	897.031	0.860667	6.66667e-06	2015-16
11425	Cromer	562.919	0.775475	0	2015-16
11426	Dee Why - North Curl Curl	1016.73	0.902682	0.02008	2015-16
11427	Forestville - Killarney Heights	793.282	0.848976	0.00024	2015-16
11428	Frenchs Forest - Belrose	1668.85	0.850024	0	2015-16
11429	Freshwater - Brookvale	949.821	0.881286	0.00138667	2015-16
11430	Manly Vale - Allambie Heights	911.081	0.85882	0.0246267	2015-16
11431	Narrabeen - Collaroy	1278.18	0.96495	0.0682133	2015-16
11432	Terrey Hills - Duffys Forest	228.523	0.851032	0	2015-16
11433	Camden - Ellis Lane	757.294	0.904088	0.00066	2015-16
11434	Elderslie - Harrington Park	804.937	0.840093	0	2015-16
11435	Mount Annan - Currans Hill	922.343	0.836581	0	2015-16
11436	Bradbury - Wedderburn	787.419	0.74807	0	2015-16
11437	Campbelltown - Woodbine	680.673	0.919632	0.000233333	2015-16
11438	Claymore - Eagle Vale - Raby	830.942	0.731835	0	2015-16
11440	Ingleburn - Denham Court	878.293	0.811255	0	2015-16
11441	Leumeah - Minto Heights	910.625	0.761679	0	2015-16
11442	Macquarie Fields - Glenfield	921.014	0.801107	0.0216867	2015-16
11443	Minto - St Andrews	791.364	0.794648	0.00702	2015-16
11444	Rosemeadow - Glen Alpine	941.543	0.791587	0	2015-16
11445	Bargo	312.003	0.96352	0.154787	2015-16
11446	Douglas Park - Appin	462.094	0.906801	0.00245333	2015-16
11447	Picton - Tahmoor - Buxton	914.039	0.740557	0	2015-16
11448	The Oaks - Oakdale	484.087	0.91677	0.000826667	2015-16
11449	Blackheath - Megalong Valley	433.931	0.983136	0.309807	2015-16
11450	Blaxland - Warrimoo - Lapstone	1330.58	0.997231	0.455793	2015-16
11451	Blue Mountains - North	3	1.01732	0.74854	2015-16
11452	Katoomba - Leura	914.511	1.01505	0.729813	2015-16
11453	Lawson - Hazelbrook - Linden	733.255	0.949469	0.05766	2015-16
11454	Springwood - Winmalee	1395.61	0.943251	0.0501667	2015-16
11455	Wentworth Falls	466.758	0.94908	0.0666667	2015-16
11456	Blue Mountains - South	3	0.949651	0.0353533	2015-16
11457	Cambridge Park	750.013	0.956652	0.08516	2015-16
11458	Castlereagh - Cranebrook	834.131	0.742376	0	2015-16
11459	Emu Plains - Leonay	864.116	0.829904	0	2015-16
11460	Glenmore Park - Regentville	868.236	0.912732	0.00933333	2015-16
11461	Jamisontown - South Penrith	907.183	0.897431	0.000226667	2015-16
11462	Kingswood - Werrington	609.068	0.866381	0	2015-16
11463	Mulgoa - Luddenham - Orchard Hills	416.909	0.977673	0.191447	2015-16
11464	Penrith	370.692	0.877615	6.66667e-06	2015-16
11465	Warragamba - Silverdale	272.026	1.0167	0.72994	2015-16
11466	Richmond - Clarendon	664.609	0.874987	0.00036	2015-16
11467	Windsor - Bligh Park	577.867	0.816995	0	2015-16
11468	Yarramundi - Londonderry	274.401	0.840287	0	2015-16
11469	Erskine Park	292.769	0.821743	6.66667e-06	2015-16
11470	St Clair	919.769	0.882282	0.00825333	2015-16
11473	Homebush Bay - Silverwater	430.666	0.910644	0.111353	2015-16
11475	Rookwood Cemetery	3	0.801814	0	2015-16
11476	Carlingford	1663.64	0.998201	0.479107	2015-16
11477	Ermington - Rydalmere	945.727	0.958287	0.0517533	2015-16
11478	Oatlands - Dundas Valley	846.715	0.995993	0.43846	2015-16
11479	Chester Hill - Sefton	775.823	0.928759	0.16718	2015-16
11480	Fairfield - East	666.951	0.92844	0.00924	2015-16
11481	Granville - Clyde	732.638	0.978891	0.19934	2015-16
11482	Greystanes - Pemulwuy	1515.95	0.986528	0.32546	2015-16
11483	Guildford - South Granville	739.704	0.950006	0.118887	2015-16
11484	Guildford West - Merrylands West	740.766	1.00867	0.603033	2015-16
11485	Merrylands - Holroyd	944.416	0.974047	0.21874	2015-16
11486	Smithfield Industrial	3	0.924708	0.0234467	2015-16
11487	Yennora Industrial	3	0.801495	0	2015-16
11489	North Parramatta	605.081	0.92517	0.163487	2015-16
11490	North Rocks	619.084	0.891233	0.09284	2015-16
11491	Northmead	563.683	0.881659	0.0515267	2015-16
11492	Parramatta - Rosehill	563.129	0.893343	2e-05	2015-16
11493	Toongabbie - Constitution Hill	1079.93	0.889495	0.0743667	2015-16
11494	Winston Hills	697.373	0.849678	0.0311067	2015-16
11495	Epping - North Epping	1534.39	0.956457	0.301407	2015-16
11496	Pennant Hills - Cheltenham	1296.61	0.9986	0.475113	2015-16
11497	Eastwood - Denistone	1576.95	0.920331	0.12794	2015-16
11498	Gladesville - Huntleys Point	811.37	0.964067	0.0826733	2015-16
11499	Hunters Hill - Woolwich	591.259	1.00343	0.55526	2015-16
11500	Macquarie Park - Marsfield	696.689	0.941608	0.195367	2015-16
11501	North Ryde - East Ryde	828.867	0.922483	0.148847	2015-16
11503	West Ryde - Meadowbank	841.047	0.801083	0	2015-16
11504	Ashcroft - Busby - Miller	618.428	0.810717	0	2015-16
11505	Austral - Greendale	471.717	0.84486	0.00402667	2015-16
11506	Cobbitty - Leppington	565.558	0.835578	0	2015-16
11509	Bonnyrigg Heights - Bonnyrigg	849.994	0.800503	0.00066	2015-16
11510	Bossley Park - Abbotsbury	1088.33	0.695115	0	2015-16
11511	Cabramatta - Lansvale	1194.99	0.829833	0	2015-16
11512	Cabramatta West - Mount Pritchard	927.271	0.813356	0.00356	2015-16
11513	Canley Vale - Canley Heights	1265.26	0.843413	0.0132867	2015-16
11514	Edensor Park	535.262	0.939156	0.00842667	2015-16
11515	Fairfield	676.293	0.843067	0.0177267	2015-16
11516	Fairfield - West	1000.29	0.798175	0.00666667	2015-16
11517	Greenfield Park - Prairiewood	445.442	0.721584	0	2015-16
11518	Horsley Park - Kemps Creek	244.89	0.773617	0	2015-16
11519	Smithfield - Wetherill Park	908.36	0.813319	0.00315333	2015-16
11520	St Johns Park - Wakeley	680.42	0.811062	0.00550667	2015-16
11521	Wetherill Park Industrial	3	0.801492	0.00499333	2015-16
11522	Casula	685.975	0.821363	0.00451333	2015-16
11523	Chipping Norton - Moorebank	961.977	0.8507	0	2015-16
11524	Holsworthy - Wattle Grove	733.924	0.805215	0	2015-16
11529	Gymea - Grays Point	1035.58	0.867902	0.0561533	2015-16
11530	Miranda - Yowie Bay	883.216	0.823023	0	2015-16
11531	Sylvania - Taren Point	961.86	0.863987	0.0422	2015-16
11533	Heathcote - Waterfall	361.177	0.887907	0.126853	2015-16
11534	Illawong - Alfords Point	741.338	0.917203	0.000433333	2015-16
11535	Menai - Lucas Heights - Woronora	1289.31	0.877454	0.0492933	2015-16
11536	Oyster Bay - Como - Jannali	1362.32	0.923982	0.00028	2015-16
11537	Royal National Park	3	0.878442	0.0489733	2015-16
11538	Sutherland - Kirrawee	800.349	0.899477	0.104227	2015-16
11539	Goulburn	1375.19	0.97396	0.27236	2015-16
11540	Goulburn Region	859.336	0.978589	0.23244	2015-16
11541	Yass	338.76	0.854377	0.00140667	2015-16
11542	Yass Region	732.995	0.969402	0.12978	2015-16
11543	Young	680.137	0.870593	2.66667e-05	2015-16
11544	Young Region	500.89	0.91959	0.0240933	2015-16
11545	Berkeley - Lake Heights - Cringila	1337.26	1.05738	0.96386	2015-16
11546	Port Kembla - Warrawong	3	1.01259	0.63164	2015-16
11547	Windang - Primbee	3	0.931882	0.0051	2015-16
11548	Wollongong - East	3	1.12801	0.997993	2015-16
11549	Wollongong - West	1125.16	1.11282	1	2015-16
11550	Banora Point	3	1.02096	0.752213	2015-16
11551	Terranora - North Tumblegum	3	0.993764	0.460347	2015-16
11552	Tweed Heads South	1820.03	0.98048	0.256847	2015-16
11553	Castle Hill - Central	3	0.645798	0	2015-16
11554	Castle Hill - East	3	0.720276	0	2015-16
11555	Castle Hill - North	1788.06	0.734837	0	2015-16
11556	Castle Hill - South	3	0.64274	0	2015-16
11557	Castle Hill - West	1316.26	0.669645	0	2015-16
11558	Cherrybrook	1582.98	0.851629	0.02866	2015-16
11559	Kellyville	3	0.753435	0	2015-16
11560	Blacktown (South)	3	0.859242	0	2015-16
11561	Blacktown (West)	1095.22	0.871497	0	2015-16
11562	Acacia Gardens	3	0.814245	0	2015-16
11563	Quakers Hill	988.204	0.744344	0	2015-16
11564	Kensington (NSW)	914.612	0.778651	0	2015-16
11565	Kingsford	3	0.749864	0	2015-16
11566	Maroubra - North	1439.21	0.820874	0	2015-16
11567	Maroubra - South	3	0.908292	0.000246667	2015-16
11568	Maroubra - West	3	0.875569	0	2015-16
11569	Randwick - North	1089.73	0.935683	0.0128733	2015-16
11570	Randwick - South	3	0.885934	2e-05	2015-16
11571	Bankstown - North	1114.48	0.87939	7.33333e-05	2015-16
11572	Bankstown - South	3	0.805461	0	2015-16
11573	Lakemba	3	0.985882	0.30672	2015-16
11574	Wiley Park	728.144	0.983504	0.311467	2015-16
11575	Strathfield	1223.25	0.875032	0	2015-16
11576	Strathfield South	3	0.776574	0	2015-16
11577	Hornsby - East	3	0.966994	0.202707	2015-16
11578	Hornsby - West	1305.96	0.986106	0.326987	2015-16
11579	Waitara - Wahroonga (West)	3	0.93513	0.0529067	2015-16
11580	Colyton - Oxley Park	3	0.850951	0	2015-16
11581	St Marys - North St Marys	1012.34	0.917177	0.0044	2015-16
11582	Auburn - Central	1125.98	0.842359	0	2015-16
11583	Auburn - North	3	0.87093	1.33333e-05	2015-16
11584	Auburn - South	3	0.963363	0.0966133	2015-16
11585	Berala	3	0.88175	3.33333e-05	2015-16
11586	Lidcombe	3	0.890886	3.33333e-05	2015-16
11587	Regents Park	1419.37	0.959112	0.16846	2015-16
11588	Pendle Hill - Girraween	984.887	0.967349	0.0714933	2015-16
11589	Wentworthville - Westmead	3	0.921659	0.15136	2015-16
11590	Putney	3	0.887952	0.180307	2015-16
11591	Ryde	1361.57	0.866731	0	2015-16
11592	Badgerys Creek	3	0.883942	0.176087	2015-16
11593	Cecil Hills	3	0.798656	0.00548	2015-16
11594	Green Valley	1370.04	0.875304	0	2015-16
11595	Hinchinbrook	3	0.826118	0.00548667	2015-16
11596	Hoxton Park - Carnes Hill - Horningsea Park	737.14	0.794698	0	2015-16
11597	West Hoxton - Middleton Grange	3	0.815875	0.0176933	2015-16
11598	Liverpool	793.636	0.816812	0.00236	2015-16
11599	Lurnea - Cartwright	3	0.823095	0.0219333	2015-16
11600	Prestons - Edmondson Park	997.51	0.885902	0	2015-16
11601	Warwick Farm	3	0.818167	0.0192	2015-16
11602	Caringbah	1411.31	0.763525	0	2015-16
11603	Caringbah South	3	0.752877	0.00348	2015-16
11604	Cronulla - Kurnell - Bundeena	1745.35	0.717882	0	2015-16
11605	Lilli Pilli - Port Hacking - Dolans Bay	3	0.727337	0.0579	2015-16
11606	Woolaware - Burraneer	3	0.729962	0	2015-16
11607	Engadine	3	0.898496	0.130947	2015-16
11608	Loftus - Yarrawarrah	1710.85	1.00305	0.551787	2015-16
11609	Woronora Heights	3	0.905021	0.166467	2015-16
21001	Alfredton	689.948	1.24431	1	2015-16
21002	Ballarat	886.381	1.159	1	2015-16
21003	Ballarat - North	1499.74	1.15976	1	2015-16
21004	Ballarat - South	1340.42	1.06904	0.994987	2015-16
21005	Buninyong	565.687	1.2333	1	2015-16
21006	Delacombe	396.659	1.14096	0.9982	2015-16
21007	Smythes Creek	286.817	1.1887	0.999847	2015-16
21008	Wendouree - Miners Rest	943.508	1.14163	0.999993	2015-16
21009	Bacchus Marsh Region	403.201	1.00901	0.590427	2015-16
21010	Creswick - Clunes	639.693	1.09281	0.995673	2015-16
21011	Daylesford	731.459	0.980578	0.279073	2015-16
21012	Gordon (Vic.)	389.21	1.08035	0.970973	2015-16
21013	Avoca	315.764	1.04964	0.850973	2015-16
21014	Beaufort	357.065	1.10637	0.99004	2015-16
21015	Golden Plains - North	320.022	1.11612	0.991807	2015-16
21016	Maryborough (Vic.)	597.641	1.01545	0.6485	2015-16
21017	Maryborough Region	458.962	1.05203	0.895447	2015-16
21018	Bendigo	881.393	1.11205	0.999693	2015-16
21019	California Gully - Eaglehawk	712.822	1.06198	0.956407	2015-16
21020	East Bendigo - Kennington	1012.55	1.23559	1	2015-16
21021	Flora Hill - Spring Gully	563.636	1.23744	1	2015-16
21022	Kangaroo Flat - Golden Square	1318.54	1.1212	0.99998	2015-16
21023	Maiden Gully	303.217	1.20671	0.999947	2015-16
21024	Strathfieldsaye	606.542	1.2291	1	2015-16
21025	White Hills - Ascot	641.535	1.16976	0.999993	2015-16
21026	Bendigo Region - South	436.316	1.17165	0.999953	2015-16
21027	Castlemaine	924.557	1.19686	1	2015-16
21028	Castlemaine Region	739.209	1.12658	0.9999	2015-16
21029	Heathcote	409.127	1.07167	0.94992	2015-16
21030	Kyneton	682.829	1.00982	0.61112	2015-16
21031	Woodend	493.002	1.06097	0.93448	2015-16
21032	Bendigo Region - North	303.733	1.08081	0.97114	2015-16
21033	Loddon	582.277	1.03073	0.801193	2015-16
21034	Bannockburn	300.465	1.08427	0.957667	2015-16
21035	Golden Plains - South	434.906	1.06778	0.954727	2015-16
21036	Winchelsea	427.435	1.10332	0.993307	2015-16
21037	Belmont	756.393	1.03529	0.84726	2015-16
21038	Corio - Norlane	1314.49	0.904153	2.66667e-05	2015-16
21039	Geelong	735.987	1.02861	0.801313	2015-16
21040	Geelong West - Hamlyn Heights	1022.82	1.01996	0.751813	2015-16
21041	Grovedale	1269.15	1.13295	1	2015-16
21042	Highton	1508.26	1.18559	1	2015-16
21043	Lara	1002.6	1.09827	0.999233	2015-16
21044	Leopold	809.342	1.12743	0.999773	2015-16
21045	Newcomb - Moolap	904.394	0.976361	0.222553	2015-16
21046	Newtown (Vic.)	783.529	1.13076	0.999847	2015-16
21047	North Geelong - Bell Park	891.151	0.944608	0.03474	2015-16
21048	Clifton Springs	1069.84	1.17153	1	2015-16
21049	Lorne - Anglesea	476.644	1.19267	0.999993	2015-16
21050	Ocean Grove - Barwon Heads	1632.89	1.2003	1	2015-16
21051	Portarlington	774.739	1.16686	1	2015-16
21052	Point Lonsdale - Queenscliff	474.037	1.25518	1	2015-16
21053	Torquay	1262.37	1.22019	1	2015-16
21054	Alexandra	582.01	1.09856	0.994947	2015-16
21055	Euroa	522.577	1.00993	0.605613	2015-16
21056	Kilmore - Broadford	805.145	0.995745	0.447527	2015-16
21057	Mansfield (Vic.)	622.483	1.11247	0.99842	2015-16
21058	Nagambie	295.692	1.03187	0.747693	2015-16
21059	Seymour	501.358	1.03924	0.8171	2015-16
21060	Seymour Region	218.054	1.0416	0.80852	2015-16
21061	Upper Yarra Valley	3	1.05476	0.713947	2015-16
21062	Yea	321.049	1.00736	0.564247	2015-16
21063	Benalla	756.341	1.13388	0.9997	2015-16
21064	Benalla Region	313.592	1.08821	0.966613	2015-16
21065	Rutherglen	308.431	1.12207	0.99178	2015-16
21066	Wangaratta	1226.85	1.14371	1	2015-16
21067	Wangaratta Region	816.976	1.16433	1	2015-16
21068	Beechworth	433.002	1.1812	0.999933	2015-16
21069	Bright - Mount Beauty	777.829	1.22311	1	2015-16
21070	Chiltern - Indigo Valley	227.562	1.14107	0.997133	2015-16
21071	Myrtleford	414.628	1.16831	0.999827	2015-16
21072	Towong	497.094	1.04104	0.853327	2015-16
21073	West Wodonga	821.259	1.10128	0.99834	2015-16
21074	Wodonga	1400.23	1.07426	0.997533	2015-16
21075	Yackandandah	368.911	1.19412	0.999973	2015-16
21076	Drouin	1022.77	1.09992	0.9994	2015-16
21077	Mount Baw Baw Region	525.063	1.14538	0.99994	2015-16
21078	Trafalgar (Vic.)	588.005	1.20047	1	2015-16
21079	Warragul	1406.12	1.16438	1	2015-16
21081	Bairnsdale	1178.01	1.20461	1	2015-16
21082	Bruthen - Omeo	741.889	1.22922	1	2015-16
21084	Lakes Entrance	1080.86	1.27054	1	2015-16
21085	Orbost	676.124	1.19445	1	2015-16
21086	Paynesville	703.246	1.19918	1	2015-16
21087	Foster	860.814	1.19466	1	2015-16
21088	French Island	3	0.939325	0.36232	2015-16
21089	Korumburra	688.147	1.08263	0.98848	2015-16
21090	Leongatha	916.577	1.21668	1	2015-16
21091	Phillip Island	917.712	1.16194	1	2015-16
21092	Wilsons Promontory	3	1.09939	0.700347	2015-16
21093	Wonthaggi - Inverloch	1932.78	1.15873	1	2015-16
21094	Churchill	915.115	1.1841	1	2015-16
21095	Moe - Newborough	1237.05	1.11342	0.999947	2015-16
21096	Morwell	871.172	0.985068	0.31854	2015-16
21097	Traralgon	1799.45	1.16598	1	2015-16
21098	Yallourn North - Glengarry	298.922	1.20949	0.999973	2015-16
21099	Alps - West	3	1.15503	0.968967	2015-16
21100	Longford - Loch Sport	343.015	1.11426	0.993227	2015-16
21101	Maffra	1089.81	1.1651	1	2015-16
21102	Rosedale	317.145	1.06474	0.92136	2015-16
21103	Sale	850.041	1.13202	0.999933	2015-16
21104	Yarram	502.339	1.16886	0.999887	2015-16
21105	Brunswick	858.909	0.902552	0.000413333	2015-16
21106	Brunswick East	352.338	0.941758	0.08324	2015-16
21107	Brunswick West	549.389	0.905946	0.00290667	2015-16
21108	Coburg	1213.25	0.942649	0.01168	2015-16
21109	Pascoe Vale South	513.175	0.999847	0.498567	2015-16
21110	Alphington - Fairfield	505.462	1.10917	0.99476	2015-16
21111	Northcote	1210.72	1.02476	0.816513	2015-16
21112	Thornbury	771.473	0.937621	0.0224933	2015-16
21113	Ascot Vale	721.711	1.02635	0.781607	2015-16
21114	Essendon - Aberfeldie	1584.74	1.09692	0.999927	2015-16
21115	Flemington	314.273	0.946234	0.113093	2015-16
21116	Moonee Ponds	778.644	1.0044	0.552113	2015-16
21117	Carlton	400.623	0.916273	0.0160933	2015-16
21118	Docklands	256.802	0.919702	0.0530667	2015-16
21119	East Melbourne	311.237	0.983954	0.353887	2015-16
21120	Flemington Racecourse	3	0.996731	0.485447	2015-16
21121	Kensington (Vic.)	424.163	0.981262	0.331673	2015-16
21122	Melbourne	467.008	0.855939	7.33333e-05	2015-16
21123	North Melbourne	572.844	0.934022	0.0299	2015-16
21124	Parkville	212.256	0.988346	0.40626	2015-16
21125	South Yarra - West	260.339	0.877954	0.00424	2015-16
21126	Southbank	665.016	0.845389	0	2015-16
21128	Albert Park	891.261	0.948576	0.0445667	2015-16
21129	Elwood	657.343	0.988711	0.377207	2015-16
21130	Port Melbourne	904.146	1.01124	0.636547	2015-16
21131	Port Melbourne Industrial	3	0.94351	0.22662	2015-16
21132	South Melbourne	562.527	0.889378	0.000846667	2015-16
21133	St Kilda	1004	0.887999	3.33333e-05	2015-16
21134	St Kilda East	536.036	0.88335	0.00054	2015-16
21135	Armadale	472.838	0.924865	0.0263667	2015-16
21136	Prahran - Windsor	723.737	0.877645	3.33333e-05	2015-16
21137	South Yarra - East	736.36	0.908907	0.00171333	2015-16
21138	Toorak	826.103	0.853321	0	2015-16
21139	Abbotsford	275.165	0.995693	0.4637	2015-16
21140	Carlton North - Princes Hill	447.539	1.00096	0.509493	2015-16
21141	Collingwood	272.526	0.916481	0.0329867	2015-16
21142	Fitzroy	478.88	0.954372	0.1171	2015-16
21143	Fitzroy North	655.246	1.06649	0.968733	2015-16
21144	Richmond (Vic.)	1250.41	0.96895	0.115247	2015-16
21145	Yarra - North	543.588	1.06414	0.957973	2015-16
21146	Ashburton (Vic.)	471.704	1.08477	0.97116	2015-16
21147	Balwyn	1138.46	1.05766	0.977993	2015-16
21148	Balwyn North	1388.64	1.07701	0.99838	2015-16
21149	Camberwell	1535.97	1.12694	1	2015-16
21150	Glen Iris - East	1093.73	1.11032	0.999887	2015-16
21151	Hawthorn	1082.45	1.0298	0.84962	2015-16
21152	Hawthorn East	755.497	1.06273	0.966647	2015-16
21153	Kew	1534.72	1.03253	0.910413	2015-16
21154	Kew East	433.515	1.11554	0.99482	2015-16
21155	Surrey Hills (West) - Canterbury	1205.7	1.12888	0.999993	2015-16
21156	Bulleen	738.984	1.01178	0.63742	2015-16
21157	Doncaster	1327.94	0.996831	0.45082	2015-16
21159	Templestowe	1283.13	1.01638	0.731713	2015-16
21160	Templestowe Lower	978.233	1.05926	0.971627	2015-16
21161	Blackburn	1279.27	1.02437	0.78626	2015-16
21162	Blackburn South	617.227	1.10955	0.999813	2015-16
21163	Box Hill	904.061	1.00116	0.511873	2015-16
21164	Box Hill North	1073.75	1.01757	0.69562	2015-16
21165	Burwood	530.159	1.07433	0.983387	2015-16
21166	Burwood East	676.981	1.12522	0.999967	2015-16
21167	Surrey Hills (East) - Mont Albert	640.274	1.08249	0.99978	2015-16
21168	Beaumaris	1042.58	1.07666	0.993527	2015-16
21169	Brighton (Vic.)	1774.92	0.993992	0.437607	2015-16
21170	Brighton East	1044.68	1.02612	0.819393	2015-16
21171	Cheltenham - Highett (West)	569.944	1.0624	0.9852	2015-16
21172	Hampton	1077.28	1.01881	0.761813	2015-16
21173	Sandringham - Black Rock	1178.51	0.949509	0.06182	2015-16
21174	Bentleigh - McKinnon	1273.4	0.873461	0	2015-16
21176	Carnegie	784.541	0.871428	0	2015-16
21177	Caulfield - North	952.352	0.962571	0.128873	2015-16
21178	Caulfield - South	886.928	0.923436	0.0506667	2015-16
21179	Elsternwick	628.567	0.982059	0.32396	2015-16
21180	Hughesdale	308.136	0.952572	0.10076	2015-16
21181	Murrumbeena	474.241	1.00389	0.539113	2015-16
21182	Ormond - Glen Huntly	568.89	0.932165	0.180147	2015-16
21183	Aspendale Gardens - Waterways	530.552	0.932446	0.0719133	2015-16
21184	Braeside	3	0.960575	0.0719133	2015-16
21185	Carrum - Patterson Lakes	768.691	1.04711	0.916353	2015-16
21186	Chelsea - Bonbeach	763.767	1.01839	0.705293	2015-16
21187	Chelsea Heights	320.476	0.915368	0.0166	2015-16
21188	Cheltenham - Highett (East)	1170.9	1.05114	0.9612	2015-16
21189	Edithvale - Aspendale	734.479	1.03385	0.881353	2015-16
21190	Mentone	793.765	0.99671	0.45454	2015-16
21191	Moorabbin - Heatherton	424.707	1.07901	0.98638	2015-16
21193	Mordialloc - Parkdale	1125.93	1.20642	1	2015-16
21194	Malvern - Glen Iris	1135.1	1.13975	0.999993	2015-16
21195	Malvern East	1118.82	0.912052	0.00262	2015-16
21196	Bundoora - East	642.101	1.13495	0.999947	2015-16
21197	Greensborough	1550.9	1.15404	0.999967	2015-16
21198	Heidelberg - Rosanna	875.44	1.13393	0.99998	2015-16
21199	Heidelberg West	626.804	1.14928	1	2015-16
21200	Ivanhoe	813.757	1.11685	0.999307	2015-16
21201	Ivanhoe East - Eaglemont	624.344	1.06026	0.92262	2015-16
21202	Montmorency - Briar Hill	1186.73	0.929221	0.00372	2015-16
21203	Viewbank - Yallambie	1256.3	0.877405	0	2015-16
21204	Watsonia	600.355	1.17656	1	2015-16
21205	Kingsbury	468.425	1.13056	0.994587	2015-16
21207	Reservoir - East	1142.4	1.03177	0.73736	2015-16
21208	Reservoir - West	1102.26	1.11106	0.993333	2015-16
21209	Eltham	1803.02	1.17141	1	2015-16
21210	Hurstbridge	270.341	0.968818	0.26536	2015-16
21211	Kinglake	252.815	0.962356	0.178967	2015-16
21212	Panton Hill - St Andrews	377.742	0.872683	0	2015-16
21213	Plenty - Yarrambat	654.067	0.970792	0.138193	2015-16
21214	Research - North Warrandyte	543.288	0.967074	0.16748	2015-16
21215	Wattle Glen - Diamond Creek	922.772	0.839432	0	2015-16
21216	Bundoora - North	281.689	1.02251	0.746473	2015-16
21217	Bundoora - West	409.171	1.05349	0.902407	2015-16
21219	Lalor	1099.1	0.973492	0.256273	2015-16
21220	Mill Park - North	1004.22	1.04544	0.893093	2015-16
21221	Mill Park - South	685.055	0.986822	0.283853	2015-16
21223	Thomastown	1144.95	1.02729	0.745587	2015-16
21224	Wallan	728.784	1.13892	0.999907	2015-16
21225	Whittlesea	494.555	1.10367	0.99904	2015-16
21226	Airport West	395.062	0.782932	0	2015-16
21228	Keilor	658.581	0.792115	0	2015-16
21229	Keilor East	1673.88	0.98525	0.292533	2015-16
21230	Niddrie - Essendon West	387.241	1.05083	0.939707	2015-16
21231	Strathmore	658.622	0.813304	0	2015-16
21232	Gisborne	807.558	0.977238	0.373693	2015-16
21233	Macedon	256.332	0.823256	0	2015-16
21234	Riddells Creek	293.042	0.916792	0.02346	2015-16
21235	Romsey	611.032	0.99088	0.390373	2015-16
21236	Coburg North	330.658	1.08806	0.997567	2015-16
21237	Fawkner	523.921	1.09235	0.984467	2015-16
21239	Pascoe Vale	913.639	1.04395	0.925073	2015-16
21240	Sunbury	743.986	1.06112	0.986253	2015-16
21241	Sunbury - South	1486.87	1.07629	0.99594	2015-16
21242	Broadmeadows	460.626	1.15616	0.99998	2015-16
21243	Campbellfield - Coolaroo	730.43	1.04913	0.923473	2015-16
21245	Gladstone Park - Westmeadows	1168.22	1.14718	1	2015-16
21246	Greenvale - Bulla	881.187	1.05666	0.97102	2015-16
21247	Meadow Heights	631.808	1.05558	0.972893	2015-16
21248	Melbourne Airport	3	1.11925	0.99944	2015-16
21249	Roxburgh Park - Somerton	763.467	1.04712	0.90786	2015-16
21250	Tullamarine	376.52	1.0516	0.94624	2015-16
21251	Bayswater	680.172	1.0801	0.994833	2015-16
21254	Knoxfield - Scoresby	956.116	1.05121	0.927787	2015-16
21255	Lysterfield	410.179	1.03483	0.89322	2015-16
21256	Rowville - Central	966.448	0.993055	0.439427	2015-16
21257	Rowville - North	418.056	1.01944	0.67346	2015-16
21258	Rowville - South	635.538	1.04029	0.932547	2015-16
21259	Wantirna	987.992	1.11004	0.999407	2015-16
21260	Wantirna South	1262.9	1.05694	0.935653	2015-16
21261	Donvale - Park Orchards	1151.05	0.983402	0.31978	2015-16
21262	Warrandyte - Wonga Park	821.68	1.03049	0.861993	2015-16
21263	Bayswater North	648.577	1.03466	0.789987	2015-16
21265	Croydon Hills - Warranwood	1258.44	0.928274	0.0209067	2015-16
21266	Ringwood	944.872	0.948018	0.0259867	2015-16
21267	Ringwood East	1186.66	1.06367	0.993087	2015-16
21268	Ringwood North	725.103	0.961402	0.100853	2015-16
21269	Forest Hill	670.807	0.861431	0	2015-16
21270	Mitcham (Vic.)	926.506	0.984401	0.345153	2015-16
21271	Nunawading	661.564	0.881475	0.000246667	2015-16
21272	Vermont	721.094	0.953047	0.11398	2015-16
21273	Vermont South	1020.09	0.866482	0.000333333	2015-16
21274	Belgrave - Selby	666.507	0.822617	0	2015-16
21275	Chirnside Park	717.61	0.864033	0.000193333	2015-16
21276	Healesville - Yarra Glen	1014.71	0.976052	0.269887	2015-16
21277	Kilsyth	597.446	0.91455	0.00229333	2015-16
21278	Lilydale - Coldstream	1109.56	0.840593	0	2015-16
21279	Monbulk - Silvan	385.55	0.712284	0	2015-16
21280	Montrose	439.356	0.87608	0	2015-16
21281	Mooroolbark	1260.99	0.994155	0.43088	2015-16
21282	Mount Dandenong - Olinda	834.089	0.974005	0.14576	2015-16
21283	Mount Evelyn	597.556	0.819064	0	2015-16
21284	Upwey - Tecoma	590.398	0.973216	0.17394	2015-16
21285	Wandin - Seville	467.932	1.03925	0.873907	2015-16
21286	Yarra Valley	1044.78	0.957848	0.0801133	2015-16
21287	Beaconsfield - Officer	545.42	0.862905	2e-05	2015-16
21288	Bunyip - Garfield	544.214	1.11542	0.999993	2015-16
21289	Emerald - Cockatoo	1119.67	1.05909	0.986413	2015-16
21290	Koo Wee Rup	427.438	1.12019	0.999953	2015-16
21291	Pakenham - North	558.815	1.07682	0.996267	2015-16
21292	Pakenham - South	1072.89	0.959223	0.0714333	2015-16
21293	Berwick - North	1443.7	0.882149	3.33333e-05	2015-16
21294	Berwick - South	940.955	1.07435	0.998713	2015-16
21295	Doveton	466.082	0.873708	0.00218	2015-16
21297	Hallam	529.51	1.03022	0.772787	2015-16
21299	Narre Warren North	495.288	0.900489	0.000113333	2015-16
21300	Cranbourne	877.587	0.93448	0.0122267	2015-16
21301	Cranbourne East	530.556	0.981008	0.321587	2015-16
21302	Cranbourne North	587.991	0.975321	0.238253	2015-16
21303	Cranbourne South	448.175	0.918769	0.00175333	2015-16
21304	Cranbourne West	350.062	0.933277	0.0331533	2015-16
21305	Hampton Park - Lynbrook	1006.98	0.982378	0.258893	2015-16
21306	Lynbrook - Lyndhurst	405.559	1.01149	0.637253	2015-16
21308	Pearcedale - Tooradin	472.628	1.00235	0.532833	2015-16
21309	Clarinda - Oakleigh South	764.752	1.03213	0.751133	2015-16
21310	Clayton South	526.384	1.05692	0.972127	2015-16
21311	Dandenong	894.69	0.975204	0.203467	2015-16
21312	Dandenong North	1299.64	0.888819	0.00100667	2015-16
21313	Dingley Village	695.188	1.06426	0.954667	2015-16
21314	Keysborough	1311.26	0.913314	0.01124	2015-16
21316	Noble Park North	415.535	0.961033	0.162147	2015-16
21317	Springvale	1060.13	0.996492	0.459887	2015-16
21318	Springvale South	754.837	1.00486	0.5677	2015-16
21319	Ashwood - Chadstone	866.39	0.890502	4.66667e-05	2015-16
21320	Clayton	505.441	0.879794	8.66667e-05	2015-16
21321	Glen Waverley - East	1649.34	0.931381	0.110847	2015-16
21322	Glen Waverley - West	1221.51	0.941917	0.0468667	2015-16
21323	Mount Waverley - North	1058.56	0.957871	0.0763133	2015-16
21324	Mount Waverley - South	1189.34	0.956717	0.0568267	2015-16
21325	Mulgrave	1119.76	0.860607	0.000353333	2015-16
21326	Oakleigh - Huntingdale	960.073	0.894982	0.00028	2015-16
21327	Wheelers Hill	1667.95	0.794946	0	2015-16
21328	Ardeer - Albion	293.63	0.972044	0.212467	2015-16
21329	Cairnlea	442.633	0.894136	0.000853333	2015-16
21330	Deer Park - Derrimut	980.583	0.869701	6.66667e-06	2015-16
21331	Delahey	456.435	0.916263	0.000526667	2015-16
21332	Keilor Downs	897.446	0.863808	0	2015-16
21333	Kings Park (Vic.)	876.476	1.04899	0.965727	2015-16
21334	St Albans - North	1014.45	1.02119	0.788013	2015-16
21335	St Albans - South	946.089	0.88897	7.33333e-05	2015-16
21336	Sunshine	410.098	1.01984	0.70012	2015-16
21337	Sunshine North	582.249	1.02598	0.795973	2015-16
21338	Sunshine West	1011.05	1.14147	0.99974	2015-16
21339	Sydenham	495.381	1.00658	0.601353	2015-16
21340	Taylors Lakes	1163.33	1.04991	0.985733	2015-16
21341	Altona	771.296	1.09033	0.999487	2015-16
21342	Altona Meadows	1131.16	1.12372	1	2015-16
21343	Altona North	652.428	0.968435	0.102087	2015-16
21344	Newport	816.15	1.06468	0.994587	2015-16
21345	Seabrook	270.988	1.0533	0.966807	2015-16
21346	Williamstown	1077.65	1.07216	0.963667	2015-16
21347	Braybrook	765.534	1.09317	0.968853	2015-16
21348	Footscray	489.599	1.11074	0.999927	2015-16
21349	Maribyrnong	588.046	1.11301	0.98602	2015-16
21350	Seddon - Kingsville	370.475	1.04835	0.871347	2015-16
21351	West Footscray - Tottenham	474.567	1.00709	0.560733	2015-16
21352	Yarraville	659.277	1.00953	0.605087	2015-16
21353	Bacchus Marsh	1109.21	1.0022	0.516327	2015-16
21355	Hillside	713.116	1.04625	0.88424	2015-16
21356	Melton	918.949	1.04627	0.854647	2015-16
21357	Melton South	865.981	0.97222	0.272713	2015-16
21358	Melton West	638.455	1.06038	0.857193	2015-16
21359	Rockbank - Mount Cottrell	100.802	0.952848	0.124253	2015-16
21360	Taylors Hill	552.952	0.995324	0.455073	2015-16
21361	Hoppers Crossing - North	950.224	1.03443	0.840253	2015-16
21362	Hoppers Crossing - South	1116.1	0.99957	0.496087	2015-16
21363	Laverton	250.615	1.04222	0.92732	2015-16
21365	Tarneit	742.545	1.05433	0.94902	2015-16
21366	Truganina	278.38	0.953368	0.179727	2015-16
21368	Werribee - South	612.077	1.04986	0.863567	2015-16
21369	Wyndham Vale	658.868	1.04844	0.85802	2015-16
21370	Carrum Downs	858.919	1.0537	0.967927	2015-16
21371	Frankston	1166.26	1.05738	0.980213	2015-16
21372	Frankston North	1018.65	1.08926	0.953853	2015-16
21373	Frankston South	1269.81	1.03379	0.82648	2015-16
21374	Langwarrin	1351.41	1.07337	0.986267	2015-16
21375	Seaford (Vic.)	925.424	1.1834	1	2015-16
21376	Skye - Sandhurst	572.368	1.04582	0.918393	2015-16
21377	Dromana	860.985	1.11232	0.994433	2015-16
21378	Flinders	551.126	1.0835	0.999933	2015-16
21379	Hastings - Somers	1379.51	1.02493	0.59172	2015-16
21380	Mornington	1835.44	0.922819	0.00120667	2015-16
21381	Mount Eliza	1362.28	0.937674	0.273893	2015-16
21382	Mount Martha	1318.87	0.874844	0	2015-16
21383	Point Nepean	1382.84	1.02596	0.572167	2015-16
21384	Rosebud - McCrae	1632.05	1.046	0.649687	2015-16
21385	Somerville	1203.34	0.921127	0.000566667	2015-16
21386	Ararat	587.046	0.906418	0.231107	2015-16
21387	Ararat Region	276.408	0.969203	0.33978	2015-16
21388	Horsham	1105.08	0.94416	0.37274	2015-16
21389	Horsham Region	232.234	1.00815	0.64008	2015-16
21390	Nhill Region	507.083	1.00072	0.50326	2015-16
21391	St Arnaud	280.838	0.981645	0.408993	2015-16
21392	Stawell	625.816	0.899243	2.66667e-05	2015-16
21393	West Wimmera	215.236	1.03774	0.69096	2015-16
21394	Yarriambiack	521.772	0.965138	0.332247	2015-16
21395	Irymple	364.844	0.964232	0.324587	2015-16
21396	Merbein	275.232	0.993421	0.475667	2015-16
21398	Mildura Region	258.108	1.00051	0.504227	2015-16
21399	Red Cliffs	349.997	0.871168	0	2015-16
21400	Buloke	421.066	0.972171	0.362487	2015-16
21401	Gannawarra	543.722	0.983932	0.245013	2015-16
21402	Kerang	307.228	0.924746	0.331193	2015-16
21403	Robinvale	180.969	1.05085	0.984513	2015-16
21404	Swan Hill	708.936	0.866905	0.143387	2015-16
21405	Swan Hill Region	401.009	0.942476	0.216733	2015-16
21406	Echuca	1041.02	0.935736	0.00298667	2015-16
21407	Kyabram	777.208	0.904375	0.114947	2015-16
21408	Lockington - Gunbower	226.906	0.953425	0.267633	2015-16
21409	Rochester	295.116	0.928893	0.00235333	2015-16
21410	Rushworth	348.939	0.904713	0.00014	2015-16
21411	Cobram	416.775	0.862438	0.0897133	2015-16
21412	Moira	206.924	0.957139	0.251113	2015-16
21413	Numurkah	852.513	0.85804	0	2015-16
21414	Yarrawonga	666.271	0.887706	4e-05	2015-16
21415	Mooroopna	499.818	0.908421	0.21604	2015-16
21416	Shepparton - North	1110.75	0.916223	0.209847	2015-16
21417	Shepparton - South	1265.43	0.915901	0.208093	2015-16
21418	Shepparton Region - East	281.778	0.945086	0.230113	2015-16
21419	Shepparton Region - West	715.374	0.949685	0.0229533	2015-16
21420	Glenelg (Vic.)	731.401	1.03408	0.662633	2015-16
21421	Hamilton (Vic.)	806.971	0.932263	0.00229333	2015-16
21422	Portland	841.238	0.96451	0.0545	2015-16
21423	Southern Grampians	505.052	0.982792	0.400613	2015-16
21424	Doncaster East (North)	2049.26	1.12816	0.999993	2015-16
21425	Doncaster East (South)	3	1.07655	0.977747	2015-16
21426	Bentleigh East (North)	1362.6	1.00572	0.57178	2015-16
21427	Bentleigh East (South)	3	0.987758	0.354747	2015-16
21428	Preston - East	1341	1.14429	0.999887	2015-16
21429	Preston - West	3	1.12604	0.998887	2015-16
21430	Doreen	3	1.04113	0.788073	2015-16
21431	Epping - East	1347.62	1.14264	0.996773	2015-16
21432	Epping - South	3	1.03303	0.831833	2015-16
21433	Epping - West	3	0.888976	0.00684	2015-16
21434	Mernda	3	0.882507	0.000686667	2015-16
21435	South Morang (North)	1875.24	0.963834	0.111253	2015-16
21436	South Morang (South)	3	1.03901	0.871507	2015-16
21437	Wollert	3	1.06824	0.996813	2015-16
21438	Glenroy	1222.88	1.03268	0.787167	2015-16
21439	Gowanbrae	3	1.01063	0.619747	2015-16
21440	Hadfield	3	1.09769	0.998827	2015-16
21441	Craigieburn - Central	3	1.11431	0.998293	2015-16
21442	Craigieburn - North	3	1.12419	0.99966	2015-16
21443	Craigieburn - South	3	1.12681	0.999967	2015-16
21444	Craigieburn - West	1473.42	1.06054	0.94714	2015-16
21445	Mickleham - Yuroke	3	1.10495	0.998793	2015-16
21446	Boronia	1561.58	1.03306	0.822087	2015-16
21447	Ferntree Gully (North)	3	1.04447	0.848887	2015-16
21448	Ferntree Gully (South) - Upper Ferntree Gully	1701.4	0.951649	0.0408	2015-16
21449	The Basin	3	0.998774	0.4872	2015-16
21450	Croydon - East	1860.69	0.787206	0	2015-16
21451	Croydon - West	3	0.890593	0.00103333	2015-16
21452	Croydon South	3	1.04131	0.840293	2015-16
21453	Endeavour Hills - North	1511.87	0.974409	0.259093	2015-16
21454	Endeavour Hills - South	3	0.979729	0.257407	2015-16
21455	Narre Warren - North East	3	0.933753	0.0145867	2015-16
21456	Narre Warren - South West	1304.6	0.885141	1.33333e-05	2015-16
21457	Narre Warren South (East)	1151.72	0.898411	0.00129333	2015-16
21458	Narre Warren South (West)	3	1.01317	0.65528	2015-16
21459	Noble Park - East	3	0.952263	0.0712467	2015-16
21460	Noble Park - West	1324.85	0.892586	0.000113333	2015-16
21461	Burnside	1016.9	1.05978	0.933313	2015-16
21462	Burnside Heights	3	1.06184	0.893747	2015-16
21463	Caroline Springs	3	0.889213	0.0169133	2015-16
21464	Point Cook - East	3	0.979196	0.310673	2015-16
21465	Point Cook - North	3	1.01469	0.614887	2015-16
21466	Point Cook - South	1309.56	1.0491	0.927567	2015-16
21467	Werribee - East	3	1.13085	0.999727	2015-16
21468	Werribee - West	1530.28	1.00673	0.566587	2015-16
21469	Mildura - North	1929.77	0.981163	0.4317	2015-16
21470	Mildura - South	3	1.02869	0.873673	2015-16
21471	Camperdown	297.381	1.09441	0.95276	2015-16
21472	Colac	778.515	1.12059	0.999293	2015-16
21473	Colac Region	457.824	1.04759	0.881687	2015-16
21474	Corangamite - North	352.833	0.977973	0.29784	2015-16
21475	Corangamite - South	486.341	1.06049	0.927333	2015-16
21476	Otway	317.832	1.05729	0.86684	2015-16
21477	Moyne - East	395.846	0.946385	0.0909067	2015-16
21478	Moyne - West	704.984	1.12254	0.999493	2015-16
21479	Warrnambool - North	1372.54	1.12796	1	2015-16
21480	Warrnambool - South	857.855	1.13288	0.999907	2015-16
31001	Alexandra Hills	872.325	0.942365	0.0249	2015-16
31002	Belmont - Gumdale	450.604	1.02244	0.716293	2015-16
31003	Birkdale	907.691	1.04029	0.897713	2015-16
31004	Capalaba	1048.51	0.98291	0.27478	2015-16
31005	Thorneside	217.969	1.04247	0.75168	2015-16
31006	Wellington Point	751.919	1.07972	0.98596	2015-16
31007	Cleveland	1123.08	0.972052	0.16002	2015-16
31008	Ormiston	375.7	1.01938	0.659527	2015-16
31009	Redland Bay	853.179	1.01095	0.632407	2015-16
31011	Sheldon - Mount Cotton	339.21	0.964323	0.184193	2015-16
31012	Thornlands	777.219	1.00146	0.517227	2015-16
31013	Victoria Point	982.112	1.01024	0.630153	2015-16
31014	Brisbane Port - Lytton	3	1.02946	0.752033	2015-16
31015	Manly - Lota	490.528	1.00726	0.578313	2015-16
31016	Manly West	626.151	0.973574	0.31888	2015-16
31017	Murarrie	171.421	0.985805	0.36718	2015-16
31018	Tingalpa	457.972	1.00122	0.511453	2015-16
31019	Wakerley	320.023	0.962891	0.13732	2015-16
31020	Wynnum	721.142	0.922094	0.0068	2015-16
31021	Wynnum West - Hemmant	806.347	1.03316	0.771133	2015-16
31022	Bald Hills	378.234	1.04036	0.851173	2015-16
31023	Bridgeman Downs	493.466	1.1061	0.99564	2015-16
31024	Carseldine	542.504	1.0367	0.811253	2015-16
31025	Everton Park	469.088	1.09301	0.985347	2015-16
31026	McDowall	458.063	0.981062	0.282247	2015-16
31027	Aspley	720.221	0.968008	0.22538	2015-16
31028	Chermside	341.861	1.0227	0.696607	2015-16
31029	Chermside West	398.331	0.985386	0.389893	2015-16
31030	Geebung	216.08	0.979139	0.290133	2015-16
31031	Kedron - Gordon Park	524.027	0.957435	0.163	2015-16
31032	Stafford	288.1	1.02749	0.7431	2015-16
31033	Stafford Heights	425.581	1.00801	0.580727	2015-16
31034	Wavell Heights	509.57	1.0035	0.534993	2015-16
31035	Boondall	528.229	0.988242	0.43552	2015-16
31036	Brisbane Airport	3	0.969295	0.34302	2015-16
31037	Eagle Farm - Pinkenba	3	0.960958	0.211153	2015-16
31038	Northgate - Virginia	320.397	1.02027	0.6933	2015-16
31039	Nudgee - Banyo	485.942	0.925834	0.0356933	2015-16
31040	Nundah	433.629	1.06063	0.979127	2015-16
31041	Bracken Ridge	1031.55	1.01914	0.693067	2015-16
31042	Brighton (Qld)	561.211	0.930547	0.103007	2015-16
31043	Deagon	194.142	1.13614	0.997833	2015-16
31044	Sandgate - Shorncliffe	406.781	1.02574	0.743613	2015-16
31045	Taigum - Fitzgibbon	529.689	0.961894	0.18312	2015-16
31046	Zillmere	374.163	0.954493	0.131353	2015-16
31047	Camp Hill	430.579	0.902013	0.02594	2015-16
31048	Cannon Hill	188.557	1.0089	0.586427	2015-16
31049	Carina	484.907	0.940698	0.0949133	2015-16
31050	Carina Heights	285.756	1.03218	0.866007	2015-16
31051	Carindale	1076.15	0.891426	0.0029	2015-16
31052	Annerley	375.639	0.949535	0.0661867	2015-16
31053	Coorparoo	664.09	0.931338	0.0858667	2015-16
31054	Fairfield - Dutton Park	210.228	0.903776	0.0134067	2015-16
31055	Greenslopes	330.53	0.963881	0.205353	2015-16
31056	Holland Park	336.574	1.01362	0.609893	2015-16
31057	Holland Park West	263.227	0.854755	0.00168667	2015-16
31058	Woolloongabba	206.374	0.970094	0.230667	2015-16
31059	Yeronga	407.745	0.984533	0.3181	2015-16
31060	Eight Mile Plains	759.053	0.968356	0.221453	2015-16
31061	Macgregor (Qld)	331.023	0.996799	0.467733	2015-16
31062	Mansfield (Qld)	528.12	0.910698	0.00438	2015-16
31063	Mount Gravatt	611.956	1.01246	0.610607	2015-16
31064	Rochedale - Burbank	280.587	0.910228	0.0132067	2015-16
31065	Upper Mount Gravatt	296.088	1.03792	0.851627	2015-16
31066	Wishart	635.081	0.92351	0.0703733	2015-16
31067	Coopers Plains	206.402	0.964823	0.18968	2015-16
31068	Moorooka	483.894	0.88574	0.00793333	2015-16
31069	Robertson	248.002	1.03228	0.74324	2015-16
31070	Salisbury - Nathan	317.825	1.0109	0.615593	2015-16
31071	Tarragindi	515.529	0.902447	0.00705333	2015-16
31072	Algester	389.672	0.991631	0.391453	2015-16
31073	Calamvale - Stretton	960.275	1.06798	0.905707	2015-16
31074	Pallara - Willawong	190.658	0.920575	0.00917333	2015-16
31075	Parkinson - Drewvale	608.771	0.835657	1.33333e-05	2015-16
31076	Rocklea - Acacia Ridge	425.029	1.01036	0.60426	2015-16
31077	Kuraby	360.709	0.994069	0.433953	2015-16
31078	Runcorn	664.46	0.974923	0.266987	2015-16
31079	Sunnybank	458.474	0.951545	0.0372067	2015-16
31080	Sunnybank Hills	1082.69	1.02676	0.7492	2015-16
31081	Jindalee - Mount Ommaney	522.768	1.06399	0.92754	2015-16
31082	Middle Park - Jamboree Heights	483.411	1.01286	0.592607	2015-16
31083	Riverhills	212.116	1.01562	0.64918	2015-16
31084	Seventeen Mile Rocks - Sinnamon Park	506.765	1.02808	0.720167	2015-16
31085	Westlake	336.507	1.03848	0.814833	2015-16
31086	Bellbowrie - Moggill	485.11	0.983434	0.343973	2015-16
31087	Brookfield - Kenmore Hills	441.234	1.05805	0.948713	2015-16
31088	Chapel Hill	690.647	1.07039	0.893453	2015-16
31089	Fig Tree Pocket	229.395	0.983599	0.32942	2015-16
31090	Kenmore	619.314	1.07978	0.949927	2015-16
31091	Pinjarra Hills - Pullenvale	332.269	1.0834	0.97368	2015-16
31092	Chelmer - Graceville	460.091	1.00557	0.537773	2015-16
31093	Corinda	261.023	1.0065	0.56656	2015-16
31094	Indooroopilly	593.352	1.08064	0.94746	2015-16
31095	Sherwood	311.935	0.934351	0.0723067	2015-16
31096	St Lucia	341.763	0.981392	0.370967	2015-16
31097	Taringa	254.242	0.976095	0.324193	2015-16
31098	Enoggera	273.916	1.02141	0.614767	2015-16
31099	Enoggera Reservoir	3	0.956707	0.173853	2015-16
31100	Keperra	337.398	1.05728	0.8869	2015-16
31101	Mitchelton	348.955	1.08633	0.99762	2015-16
31103	The Gap	1109.28	1.12534	0.998833	2015-16
31104	Upper Kedron - Ferny Grove	518.53	0.890898	0.00874	2015-16
31105	Brisbane City	284.176	0.912017	0.0461267	2015-16
31106	Fortitude Valley	191.657	0.960645	0.21226	2015-16
31107	Highgate Hill	285.817	0.917115	0.0501667	2015-16
31108	Kangaroo Point	269.03	0.900641	0.00153333	2015-16
31109	New Farm	690.243	0.931204	0.118667	2015-16
31110	South Brisbane	215.272	0.882911	0.00768	2015-16
31111	Spring Hill	232.794	0.982804	0.342347	2015-16
31112	West End	436.917	1.04469	0.753233	2015-16
31113	Balmoral	193.15	0.976839	0.320267	2015-16
31114	Bulimba	311.4	0.929868	0.0682867	2015-16
31115	East Brisbane	332.977	0.958806	0.232547	2015-16
31116	Hawthorne	190.693	0.904931	0.00838	2015-16
31117	Morningside - Seven Hills	451.826	0.947164	0.117247	2015-16
31118	Norman Park	264.712	0.898788	0.0408867	2015-16
31119	Albion	126.683	1.03648	0.769333	2015-16
31120	Alderley	271.658	0.860053	0.0012	2015-16
31121	Ascot	256.097	0.950753	0.10586	2015-16
31122	Clayfield	447.569	1.04867	0.811447	2015-16
31123	Grange	211.934	0.859641	0.000293333	2015-16
31124	Hamilton (Qld)	302.203	0.951346	0.17132	2015-16
31125	Hendra	276.529	0.970498	0.280653	2015-16
31126	Kelvin Grove - Herston	263.947	1.05137	0.835227	2015-16
31127	Newmarket	193.682	0.884183	0.00735333	2015-16
31128	Newstead - Bowen Hills	216.703	0.985403	0.3944	2015-16
31129	Wilston	163.334	0.945619	0.144907	2015-16
31130	Windsor	244.207	0.941409	0.07788	2015-16
31131	Wooloowin - Lutwyche	384.988	1.06022	0.95554	2015-16
31132	Ashgrove	700.239	1.00079	0.506053	2015-16
31133	Auchenflower	213.922	1.03936	0.82002	2015-16
31134	Bardon	490.007	0.922999	0.0261133	2015-16
31135	Paddington - Milton	440.563	0.945764	0.153667	2015-16
31136	Red Hill (Qld)	225.692	0.97921	0.296293	2015-16
31137	Toowong	492.761	0.948523	0.147067	2015-16
31138	Brinsmead	307.487	0.953578	0.0926	2015-16
31139	Clifton Beach - Kewarra Beach	669.609	1.02955	0.718927	2015-16
31140	Freshwater - Stratford	287.539	1.06588	0.967927	2015-16
31141	Redlynch	724.947	1.01836	0.713213	2015-16
31142	Trinity Beach - Smithfield	775.321	0.967688	0.239627	2015-16
31143	Yorkeys Knob - Machans Beach	371.793	0.927694	0.0828867	2015-16
31144	Bentley Park	252.635	0.90155	0.00331333	2015-16
31145	Cairns City	610.756	0.947399	0.0949067	2015-16
31146	Earlville - Bayview Heights	474.59	0.920006	0.0261867	2015-16
31147	Edmonton	418.286	0.957558	0.15626	2015-16
31148	Gordonvale - Trinity	429.922	0.978026	0.2795	2015-16
31149	Kanimbla - Mooroobool	525.556	0.845057	0.000246667	2015-16
31151	Manoora	227.068	0.863304	0.00447333	2015-16
31152	Manunda	221.799	1.04169	0.834927	2015-16
31153	Mount Sheridan	439.889	0.876839	0.0038	2015-16
31154	Westcourt - Bungalow	271.361	0.924424	0.0591733	2015-16
31155	White Rock	195.589	1.02283	0.716767	2015-16
31156	Whitfield - Edge Hill	513.085	0.929827	0.08682	2015-16
31157	Woree	184.549	1.02107	0.661307	2015-16
31158	Babinda	292.642	1.04875	0.905907	2015-16
31159	Innisfail	662.436	1.14264	0.998733	2015-16
31160	Johnstone	469.935	1.06306	0.966587	2015-16
31161	Tully	789.837	0.713447	2.66667e-05	2015-16
31163	Yarrabah	51.0972	1.01005	0.585527	2015-16
31164	Daintree	401.902	0.896748	0.01522	2015-16
31165	Port Douglas	301.437	1.06643	0.974213	2015-16
31166	Atherton	824.327	0.988841	0.39588	2015-16
31167	Herberton	468.363	0.975307	0.285407	2015-16
31168	Kuranda	330.937	1.10291	0.998193	2015-16
31169	Malanda - Yungaburra	764.27	1.00567	0.564627	2015-16
31170	Mareeba	674.462	0.930907	0.09372	2015-16
31171	Balonne	222.205	0.994016	0.44448	2015-16
31172	Chinchilla	356.604	0.988313	0.38996	2015-16
31173	Goondiwindi	346.497	1.02405	0.669053	2015-16
31174	Inglewood - Waggamba	289.352	0.975683	0.29746	2015-16
31175	Miles - Wandoan	203.589	0.917072	0.04072	2015-16
31176	Roma	286.741	0.958637	0.217473	2015-16
31177	Roma Region	309.964	0.966529	0.22778	2015-16
31178	Tara	259.926	1.0786	0.98404	2015-16
31179	Crows Nest - Rosalie	637.68	0.969364	0.218287	2015-16
31180	Jondaryan	408.489	0.968372	0.26624	2015-16
31181	Millmerran	215.727	0.969819	0.19384	2015-16
31182	Pittsworth	603.358	0.949712	0.05072	2015-16
31183	Wambo	860.13	0.986584	0.379027	2015-16
31184	Clifton - Greenmount	331.273	0.99495	0.458253	2015-16
31185	Southern Downs - East	288.151	0.953114	0.153947	2015-16
31186	Southern Downs - West	339.85	0.99893	0.488173	2015-16
31187	Stanthorpe	466.95	1.08076	0.952047	2015-16
31188	Stanthorpe Region	438.155	0.996713	0.4568	2015-16
31189	Warwick	1005.57	0.890683	0.02152	2015-16
31190	Central Highlands - East	238.145	0.904818	0.0187067	2015-16
31191	Central Highlands - West	284.029	0.944773	0.06306	2015-16
31192	Emerald	502.06	0.790057	1.33333e-05	2015-16
31205	Berserker	247.192	1.03244	0.692867	2015-16
31206	Bouldercombe	117.971	1.07781	0.96716	2015-16
31207	Emu Park	397.626	1.12371	0.998087	2015-16
31208	Frenchville - Mount Archer	582.008	1.09271	0.949413	2015-16
31209	Glenlee - Rockyview	240.92	0.997645	0.477527	2015-16
31210	Gracemere	461.85	0.931189	0.105207	2015-16
31211	Lakes Creek	223.252	0.947697	0.171387	2015-16
31212	Mount Morgan	201.88	1.05925	0.91288	2015-16
31213	Norman Gardens	476.054	0.940268	0.09962	2015-16
31214	Park Avenue	243.906	1.03469	0.758	2015-16
31215	Parkhurst - Kawana	292.537	0.966559	0.240553	2015-16
31216	Rockhampton - West	290.899	0.932269	0.0464867	2015-16
31217	Rockhampton City	378.141	1.01933	0.662087	2015-16
31218	Rockhampton Region - East	289.732	1.07115	0.94316	2015-16
31219	Rockhampton Region - North	329.812	0.97904	0.340313	2015-16
31220	Rockhampton Region - West	162.231	0.971128	0.324373	2015-16
31221	Shoalwater Bay	3	0.972879	0.28248	2015-16
31222	The Range - Allenstown	401.933	1.12975	1	2015-16
31223	Yeppoon	1279.18	0.973465	0.2525	2015-16
31224	Broadbeach Waters	536.538	0.928728	0.0317067	2015-16
31225	Burleigh Heads	551.964	0.894123	0.000413333	2015-16
31226	Burleigh Waters	932.788	0.879146	2e-05	2015-16
31227	Mermaid Beach - Broadbeach	616.577	0.983929	0.305173	2015-16
31228	Mermaid Waters	825.833	0.97639	0.245613	2015-16
31229	Miami	384.212	0.97725	0.326853	2015-16
31230	Coolangatta	426.21	0.990236	0.3727	2015-16
31231	Currumbin - Tugun	690.738	0.975915	0.282	2015-16
31232	Currumbin Waters	619.114	0.971138	0.159427	2015-16
31233	Elanora	842.038	0.949501	0.127493	2015-16
31234	Palm Beach	675.688	0.892584	0.00086	2015-16
31235	Arundel	585.232	0.951003	0.0961	2015-16
31236	Biggera Waters	428.216	0.948319	0.0295	2015-16
31237	Coombabah	675.383	0.933034	0.02058	2015-16
31238	Labrador	976.755	0.985623	0.36332	2015-16
31239	Paradise Point - Hollywell	880.117	0.852223	0.000806667	2015-16
31240	Runaway Bay	661.912	0.97978	0.228767	2015-16
31241	Guanaba - Springbrook	270.406	0.895995	0.000953333	2015-16
31242	Tamborine - Canungra	1038.2	0.911056	0.0310067	2015-16
31243	Currumbin Valley - Tallebudgera	440.988	0.937306	0.0182533	2015-16
31244	Mudgeeraba - Bonogin	1021.44	0.949999	0.0498467	2015-16
31245	Reedy Creek - Andrews	364.643	0.884156	0.0164133	2015-16
31246	Carrara	606.03	0.875712	1.33333e-05	2015-16
31247	Highland Park	472.822	1.0143	0.611753	2015-16
31248	Nerang - Mount Nathan	1134.32	0.871653	0.000793333	2015-16
31249	Pacific Pines - Gaven	703.715	0.952654	0.0279067	2015-16
31250	Worongary - Tallai	474.695	0.926925	0.0174933	2015-16
31251	Coomera	302.552	0.968153	0.173447	2015-16
31252	Helensvale	1216.49	0.900659	0.00842667	2015-16
31253	Hope Island	558.414	1.0354	0.800513	2015-16
31254	Jacobs Well - Alberton	228.749	0.931694	0.02202	2015-16
31255	Ormeau - Yatala	780.235	0.899823	0.00624667	2015-16
31256	Oxenford - Maudsland	828.389	0.898924	0.0240933	2015-16
31257	Pimpama	154.072	0.880395	2e-05	2015-16
31258	Upper Coomera - Willow Vale	884.287	0.924766	0.0504267	2015-16
31259	Clear Island Waters	317.602	0.92052	0.03554	2015-16
31260	Merrimac	298.033	0.930722	0.00376667	2015-16
31261	Robina	1358.31	0.848878	0	2015-16
31262	Varsity Lakes	590.981	0.990425	0.41516	2015-16
31263	Ashmore	696.643	0.903158	0.0353733	2015-16
31264	Molendinar	325.788	1.03256	0.838993	2015-16
31265	Parkwood	547.853	1.0319	0.773253	2015-16
31267	Benowa	660.283	0.933484	0.0308533	2015-16
31268	Bundall	352.199	0.894339	0.00492	2015-16
31269	Main Beach	173.628	0.840279	0.00026	2015-16
31270	Surfers Paradise	972.214	0.901282	0.0176067	2015-16
31271	Darra - Sumner	217.427	0.901541	0.0136933	2015-16
31272	Durack	323.327	0.843334	0	2015-16
31273	Forest Lake - Doolandella	1215.57	0.969228	0.275533	2015-16
31274	Inala - Richlands	707.557	1.03463	0.759427	2015-16
31275	Oxley (Qld)	343.653	0.996929	0.472247	2015-16
31276	Wacol	115.409	0.880203	0.00315333	2015-16
31277	Boonah	820.063	0.892025	0.00383333	2015-16
31278	Esk	429.242	0.934528	0.02614	2015-16
31280	Lockyer Valley - East	1060.16	0.940778	0.13346	2015-16
31281	Lowood	671.368	0.815953	0.000446667	2015-16
31282	Rosewood	613.686	0.895257	0.00333333	2015-16
31283	Brassall	387.508	0.906502	0.00754	2015-16
31284	Bundamba	343.838	0.864602	0.03156	2015-16
31285	Churchill - Yamanto	261.647	0.89134	0.0086	2015-16
31286	Ipswich - Central	282.395	0.767416	0	2015-16
31287	Ipswich - East	691.962	0.786163	0	2015-16
31288	Ipswich - North	222.045	0.89064	0.00817333	2015-16
31289	Karalee - Barellan Point	297.345	0.879544	0.00179333	2015-16
31290	Karana Downs	346.414	0.937881	0.0306667	2015-16
31291	Leichhardt - One Mile	256.903	0.848106	1.33333e-05	2015-16
31292	North Ipswich - Tivoli	283.98	0.779475	0	2015-16
31293	Raceview	602.164	0.868331	0.0017	2015-16
31294	Ripley	146.963	0.919457	0.02874	2015-16
31295	Riverview	119.165	1.02127	0.669	2015-16
31296	Bellbird Park - Brookwater	371.001	0.893326	0.000773333	2015-16
31297	Camira - Gailes	491.258	0.85397	0.000206667	2015-16
31298	Carole Park	3	0.922684	0.07078	2015-16
31299	Collingwood Park - Redbank	278.691	0.7109	0	2015-16
31300	Goodna	352.712	0.920961	0.02878	2015-16
31302	Redbank Plains	431.646	0.733234	0	2015-16
31303	Springfield	232.079	0.921417	0.0489067	2015-16
31304	Springfield Lakes	320.518	0.843448	0	2015-16
31305	Beaudesert	710.087	0.923705	0.0181267	2015-16
31306	Beenleigh	462.54	0.908798	0.000653333	2015-16
31307	Eagleby	511.444	0.971802	0.24654	2015-16
31308	Edens Landing - Holmview	282.907	0.909273	0.00992667	2015-16
31309	Mount Warren Park	317.668	1.02142	0.698913	2015-16
31310	Wolffdene - Bahrs Scrub	344.322	0.879843	0.00016	2015-16
31311	Boronia Heights - Park Ridge	591.588	0.839727	2e-05	2015-16
31312	Browns Plains	318.42	0.996669	0.46038	2015-16
31313	Chambers Flat - Logan Reserve	243.783	0.872168	0.00102	2015-16
31314	Crestmead	323.544	0.935052	0.05818	2015-16
31316	Hillcrest	363.436	0.765984	0	2015-16
31317	Marsden	374.831	0.800793	0	2015-16
31318	Munruben - Park Ridge South	314.351	0.973797	0.207273	2015-16
31319	Regents Park - Heritage Park	623.038	0.777391	0	2015-16
31320	Greenbank	571.765	0.909182	0.00378667	2015-16
31321	Jimboomba	953.485	0.901769	0.0116333	2015-16
31322	Logan Village	403.775	0.711562	0	2015-16
31323	Bethania - Waterford	479.294	0.977435	0.287447	2015-16
31324	Cornubia - Carbrook	495.965	0.919927	0.04152	2015-16
31325	Loganholme - Tanah Merah	549.239	0.990621	0.426507	2015-16
31326	Loganlea	368.852	1.04468	0.84218	2015-16
31327	Shailer Park	675.955	0.93014	0.09524	2015-16
31328	Waterford West	325.915	1.05472	0.939193	2015-16
31329	Daisy Hill	374.386	1.04403	0.782527	2015-16
31330	Kingston (Qld.)	402.407	1.05245	0.88994	2015-16
31331	Logan Central	258.101	1.04559	0.698167	2015-16
31332	Rochedale South - Priestdale	815.479	1.05406	0.882027	2015-16
31333	Slacks Creek	438.227	1.04075	0.73052	2015-16
31334	Springwood	556.494	1.22508	1	2015-16
31335	Underwood	256.048	0.986913	0.384413	2015-16
31336	Woodridge	437.883	1.15832	0.99844	2015-16
31337	Bowen	419.743	1.0854	0.95088	2015-16
31338	Broadsound - Nebo	259.345	1.06383	0.975767	2015-16
31339	Clermont	168.029	1.18129	1	2015-16
31340	Collinsville	365.984	1.12382	0.995247	2015-16
31341	Moranbah	189.999	1.01246	0.578467	2015-16
31342	Andergrove - Beaconsfield	717.447	1.05741	0.902227	2015-16
31343	East Mackay	194.841	1.16222	0.99998	2015-16
31344	Eimeo - Rural View	453.555	1.07462	0.939433	2015-16
31345	Eungella Hinterland	3	0.943811	0.0646333	2015-16
31346	Mackay	353.677	1.13133	0.999053	2015-16
31347	Mackay Harbour	3	1.04478	0.937013	2015-16
31348	Mount Pleasant - Glenella	764.668	1.10141	0.999987	2015-16
31349	North Mackay	312.327	1.12333	0.981787	2015-16
31350	Ooralea - Bakers Creek	301.218	0.872535	0	2015-16
31351	Pioneer Valley	392.59	0.888457	0.00018	2015-16
31352	Sarina	762.714	1.09409	0.933227	2015-16
31353	Seaforth - Calen	581.23	0.993243	0.435393	2015-16
31354	Shoal Point - Bucasia	284.312	1.10127	0.959293	2015-16
31355	Slade Point	199.495	1.07853	0.942193	2015-16
31356	South Mackay	402.054	1.04053	0.824167	2015-16
31357	Walkerston - Eton	670.553	1.032	0.850787	2015-16
31358	West Mackay	336.405	0.912633	0.00068	2015-16
31359	Airlie - Whitsundays	565.924	1.06005	0.888673	2015-16
31361	Proserpine	568.637	1.11491	0.999293	2015-16
31362	Beachmere - Sandstone Point	1161.92	1.04387	0.77928	2015-16
31363	Bribie Island	1848.65	0.953789	0.125693	2015-16
31364	Burpengary - East	249.067	0.99744	0.46834	2015-16
31365	Caboolture	1191.91	0.982839	0.305327	2015-16
31366	Caboolture - South	785.081	0.996662	0.454287	2015-16
31367	Elimbah	230.161	1.07616	0.992153	2015-16
31368	Morayfield - East	343.152	1.09688	0.997987	2015-16
31369	Wamuran	279.934	1.14042	0.999667	2015-16
31370	Kilcoy	353.923	1.00044	0.504373	2015-16
31371	Woodford - D'Aguilar	442.288	1.07961	0.9991	2015-16
31372	Burpengary	935.902	1.10615	0.99944	2015-16
31373	Deception Bay	1107.39	0.979465	0.23418	2015-16
31374	Morayfield	420.026	1.01968	0.706547	2015-16
31375	Narangba	791.004	1.04239	0.921027	2015-16
31376	Upper Caboolture	182.966	0.970364	0.217387	2015-16
31377	Clontarf	548.323	1.0331	0.73418	2015-16
31378	Margate - Woody Point	779.657	1.12035	0.99678	2015-16
31379	Redcliffe	707.101	0.960071	0.13188	2015-16
31380	Rothwell - Kippa-Ring	1016.71	0.912394	0.119393	2015-16
31382	Albany Creek	973.934	0.933837	0.176907	2015-16
31383	Cashmere	861.084	0.78938	0.00155333	2015-16
31384	Dayboro	560.548	0.78108	1.33333e-05	2015-16
31385	Eatons Hill	367.464	0.920387	0.04162	2015-16
31386	The Hills District	1398.65	0.761612	0	2015-16
31387	Samford Valley	888.922	0.653904	0	2015-16
31388	Dakabin - Kallangur	1067.43	0.843595	0.00314	2015-16
31389	Murrumba Downs - Griffin	654.583	0.697826	0	2015-16
31390	North Lakes - Mango Hill	984.119	0.699487	0	2015-16
31391	Bray Park	498.395	0.649318	0	2015-16
31392	Lawnton	325.412	0.875215	0.00499333	2015-16
31393	Petrie	519.937	0.959649	0.207687	2015-16
31394	Strathpine - Brendale	661.582	0.947614	0.139713	2015-16
31395	Aurukun	3	0.864762	0.0321467	2015-16
31396	Cape York	258.617	0.922917	0.0617267	2015-16
31397	Croydon - Etheridge	50.3095	1.01097	0.580347	2015-16
31398	Kowanyama - Pormpuraaw	3	1.10235	0.999633	2015-16
31399	Northern Peninsula	55.6104	1.11537	0.99978	2015-16
31400	Tablelands	301.649	0.985494	0.34398	2015-16
31401	Torres	87.6197	1.06077	0.919953	2015-16
31402	Torres Strait Islands	79.0627	1.10005	0.995167	2015-16
31403	Weipa	70.1633	1.07313	0.958513	2015-16
31404	Carpentaria	109.879	0.994929	0.44786	2015-16
31405	Mount Isa	500.096	1.09071	0.997713	2015-16
31406	Mount Isa Region	114.349	1.12076	0.999927	2015-16
31407	Northern Highlands	164.669	1.10181	0.996267	2015-16
31408	Barcaldine - Blackall	311.544	1.0821	0.987813	2015-16
31409	Charleville	227.382	1.0334	0.775487	2015-16
31410	Far Central West	99.7365	1.06918	0.982053	2015-16
31411	Far South West	155.883	1.05883	0.966647	2015-16
31412	Longreach	210.057	1.06069	0.989707	2015-16
31413	Buderim - North	1201.46	1.03803	0.876873	2015-16
31414	Buderim - South	1082.61	0.999915	0.499273	2015-16
31415	Mountain Creek	476.453	1.03872	0.878367	2015-16
31416	Sippy Downs	497.137	1.04193	0.863487	2015-16
31417	Aroona - Currimundi	723.514	1.09438	0.997773	2015-16
31418	Buddina - Minyama	589.265	0.993628	0.438947	2015-16
31419	Caloundra - Kings Beach	477.263	1.03938	0.884027	2015-16
31420	Caloundra - West	1083.45	1.13462	0.999273	2015-16
31421	Golden Beach - Pelican Waters	1025.98	1.10946	0.997853	2015-16
31422	Moffat Beach - Battery Hill	614.815	1.15564	0.999873	2015-16
31423	Parrearra - Warana	598.742	1.11288	0.999447	2015-16
31424	Wurtulla - Birtinya	426.159	1.1245	0.992667	2015-16
31425	Coolum Beach	764.547	1.00453	0.54882	2015-16
31426	Marcoola - Mudjimba	802.533	0.969856	0.227327	2015-16
31427	Maroochydore - Kuluin	1501.36	0.951892	0.143313	2015-16
31428	Mooloolaba - Alexandra Headland	817.495	1.02355	0.685407	2015-16
31434	Noosa Heads	385.355	1.17525	1	2015-16
31435	Noosaville	820.048	0.993499	0.429213	2015-16
31437	Sunshine Beach	577.086	1.19291	0.99998	2015-16
31438	Tewantin	916.397	0.845746	0.00016	2015-16
31439	Beerwah	484.09	0.965762	0.135007	2015-16
31440	Caloundra Hinterland	857.515	1.02046	0.708273	2015-16
31441	Glass House Mountains	449.564	1.04383	0.87864	2015-16
31442	Landsborough	693.256	0.984661	0.324907	2015-16
31443	Maroochy Hinterland	627.791	0.910993	0.00462667	2015-16
31444	Palmwoods	800.282	0.905591	0.00978667	2015-16
31445	Cambooya - Wyreema	360.673	0.860613	0.00218	2015-16
31446	Darling Heights	590.002	1.00077	0.507707	2015-16
31447	Drayton - Harristown	461.841	0.939417	0.11226	2015-16
31448	Gatton	352.896	0.926491	0.0945067	2015-16
31449	Gowrie (Qld)	291.958	0.858912	0.000186667	2015-16
31450	Highfields	898.99	0.896766	0.0114133	2015-16
31451	Lockyer Valley - West	625.92	0.907149	0.00098	2015-16
31452	Middle Ridge	461.494	0.900525	0.03246	2015-16
31453	Newtown (Qld)	387.974	0.814091	0	2015-16
31454	North Toowoomba - Harlaxton	283.731	0.811922	0	2015-16
31455	Rangeville	548.722	0.856879	0.00311333	2015-16
31456	Toowoomba - Central	826.722	0.861026	0.00142667	2015-16
31457	Toowoomba - East	567.46	0.908633	0.0329267	2015-16
31458	Toowoomba - West	639.253	0.850595	6e-05	2015-16
31459	Wilsonton	702.985	0.846505	6.66667e-05	2015-16
31460	Ayr	561.193	0.969484	0.19162	2015-16
31461	Burdekin	377.547	0.996253	0.473733	2015-16
31462	Charters Towers	479.357	0.931795	0.0947267	2015-16
31463	Dalrymple	87.5956	0.974872	0.288593	2015-16
31464	Ingham	367.383	0.902435	0.01716	2015-16
31465	Ingham Region	298.048	0.926594	0.0749	2015-16
31466	Palm Island	3	0.836281	0.00114667	2015-16
31467	Aitkenvale	190.002	0.994037	0.44904	2015-16
31468	Annandale	429.411	0.941989	0.0774733	2015-16
31469	Belgian Gardens - Pallarenda	239.797	0.88598	0.00667333	2015-16
31470	Bohle Plains	233.678	1.12377	0.996247	2015-16
31471	Condon - Rasmussen	378.397	1.17502	1	2015-16
31472	Cranbrook	290.752	1.12503	0.996367	2015-16
31473	Deeragun	645.44	1.04967	0.870713	2015-16
31474	Douglas	191.466	1.13804	0.998693	2015-16
31475	Garbutt - West End	361.986	1.05165	0.9125	2015-16
31476	Gulliver - Currajong - Vincent	340.24	1.09187	0.995253	2015-16
31477	Heatley	195.895	1.11766	0.999813	2015-16
31478	Hermit Park - Rosslea	198.167	1.13641	0.999387	2015-16
31479	Hyde Park - Pimlico	256.385	1.12785	0.996473	2015-16
31480	Kelso	367.924	1.08438	0.98836	2015-16
31481	Kirwan - East	352.936	1.1145	0.996687	2015-16
31482	Kirwan - West	754.365	1.04877	0.874993	2015-16
31483	Magnetic Island	204.655	1.15445	0.999947	2015-16
31484	Mount Louisa	308.082	1.03657	0.849027	2015-16
31485	Mundingburra	192.982	1.07849	0.92072	2015-16
31486	Northern Beaches	379.612	1.07693	0.926713	2015-16
31487	Oonoonba	219.997	1.06344	0.967073	2015-16
31488	South Townsville - Railway Estate	252.255	1.0503	0.719253	2015-16
31489	Townsville - South	295.857	1.1818	1	2015-16
31490	Townsville City - North Ward	376.594	0.999167	0.48984	2015-16
31491	Wulguru - Roseneath	266.165	1.08779	0.979053	2015-16
31492	Ashfield - Kepnock	351.627	1.08683	0.999533	2015-16
31493	Bargara - Burnett Heads	1512.68	1.00635	0.55292	2015-16
31494	Branyan - Kensington	338.263	1.13436	0.998353	2015-16
31495	Bundaberg	434.064	1.17034	0.999967	2015-16
31496	Bundaberg East - Kalkie	365.316	1.08353	0.995593	2015-16
31497	Bundaberg North - Gooburrum	527.817	1.08292	0.978113	2015-16
31498	Bundaberg Region - North	739.9	1.08161	0.998653	2015-16
31499	Bundaberg Region - South	946.707	1.11175	0.999833	2015-16
31500	Millbank - Avoca	508.155	1.11312	0.999747	2015-16
31501	Svensson Heights - Norville	410.475	1.13808	0.992253	2015-16
31502	Walkervale - Avenell Heights	701.613	1.01289	0.688327	2015-16
31503	Gayndah - Mundubbera	495.426	1.07938	0.984907	2015-16
31504	Gin Gin	481.214	1.13673	0.998793	2015-16
31505	Kingaroy	714.583	0.964178	0.13758	2015-16
31506	Kingaroy Region - North	642.645	0.984014	0.350867	2015-16
31507	Kingaroy Region - South	215.58	1.05874	0.887093	2015-16
31508	Monto - Eidsvold	254.634	1.12542	0.999087	2015-16
31509	Nanango	806.494	1.03946	0.843447	2015-16
31510	North Burnett	3	1.02437	0.60118	2015-16
31511	Cooloola	766.169	0.966729	0.2225	2015-16
31512	Gympie - North	834.062	0.793937	6.66667e-06	2015-16
31513	Gympie - South	460.357	0.910351	0.00611333	2015-16
31514	Gympie Region	1515.28	0.942942	0.113227	2015-16
31515	Kilkivan	285.262	0.975994	0.31646	2015-16
31516	Booral - River Heads	420.833	0.863221	0.00334667	2015-16
31517	Craignish - Dundowran Beach	485.524	0.902037	0.170887	2015-16
31518	Pialba - Eli Waters	986.551	0.851217	0	2015-16
31519	Point Vernon	514.573	1.13287	0.999987	2015-16
31520	Torquay - Scarness - Kawungan	1306.94	0.909955	0.19122	2015-16
31521	Urangan - Wondunna	1001.31	1.08803	0.985507	2015-16
31522	Burrum - Fraser	926.525	1.05918	0.92386	2015-16
31523	Granville	255.202	1.05808	0.846873	2015-16
31524	Maryborough (Qld)	1320.83	1.02737	0.802767	2015-16
31525	Maryborough Region - South	624.085	1.00858	0.627473	2015-16
31526	Tinana	407.223	1.09533	0.999967	2015-16
31527	Redland Islands	858.246	0.946932	0.380127	2015-16
31528	Banana	432.986	0.970688	0.190353	2015-16
31529	Biloela	322.399	0.996254	0.45428	2015-16
31530	Agnes Water - Miriam Vale	569.434	0.937177	0.0395733	2015-16
31531	Boyne Island - Tannum Sands	521.248	0.971388	0.19258	2015-16
31532	Callemondah	3	0.950651	0.12962	2015-16
31533	Clinton - New Auckland	431.888	0.939581	0.0674667	2015-16
31534	Gladstone	237.977	0.90673	0.00256	2015-16
31535	Gladstone Hinterland	632.81	0.991227	0.3967	2015-16
31536	Kin Kora - Sun Valley	205.67	0.96055	0.106433	2015-16
31538	Telina - Toolooa	215.385	0.92229	0.0102333	2015-16
31539	West Gladstone	211.791	0.952338	0.0982933	2015-16
31540	Southport - North	3	0.944694	0.02272	2015-16
31541	Southport - South	1520.88	0.890466	0.00048	2015-16
31542	Scarborough - Newport - Moreton Island	1118.47	0.80548	3.33333e-05	2015-16
31543	Peregian Beach - Marcus Beach	3	0.921105	0.0437533	2015-16
31544	Peregian Springs	647.93	1.08973	0.98514	2015-16
31545	Bli Bli	504.549	0.892955	0.00253333	2015-16
31546	Diddillibah - Rosemount	249.418	0.919975	0.10508	2015-16
31547	Eumundi - Yandina	895.66	0.857149	0.000106667	2015-16
31548	Nambour	1195.88	0.972249	0.272833	2015-16
31549	Noosa Hinterland	1789.31	0.95505	0.23456	2015-16
41001	Adelaide	616.179	1.01574	0.67928	2015-16
41002	North Adelaide	488.395	1.0766	0.96954	2015-16
41003	Adelaide Hills	618.166	1.27135	1	2015-16
41004	Aldgate - Stirling	1686.45	1.23459	1	2015-16
41005	Hahndorf - Echunga	346.4	1.1568	0.999093	2015-16
41006	Lobethal - Woodside	712.237	1.16362	1	2015-16
41007	Mount Barker	1129.42	1.14559	1	2015-16
41008	Mount Barker Region	337.496	1.25164	1	2015-16
41009	Nairne	320.595	1.26677	1	2015-16
41010	Uraidla - Summertown	414.434	1.1552	0.999887	2015-16
41011	Burnside - Wattle Park	1531.48	1.19415	1	2015-16
41012	Glenside - Beaumont	806.545	1.20765	1	2015-16
41013	Toorak Gardens	1222.83	1.20629	1	2015-16
41014	Athelstone	777.81	1.19659	1	2015-16
41015	Paradise - Newton	1171.88	1.05608	0.975647	2015-16
41016	Rostrevor - Magill	1334.51	1.11261	0.999973	2015-16
41017	Norwood (SA)	647.046	1.13029	0.999707	2015-16
41018	Payneham - Felixstow	703.179	1.09398	0.995753	2015-16
41019	St Peters - Marden	898.108	1.17447	1	2015-16
41020	Nailsworth - Broadview	368.42	1.1145	0.990727	2015-16
41021	Prospect	849.77	1.08512	0.994707	2015-16
41022	Walkerville	575.711	1.18344	0.999993	2015-16
41023	Goodwood - Millswood	1195.65	1.16636	1	2015-16
41024	Unley - Parkside	1368.73	1.14507	1	2015-16
41025	Gawler - North	626.772	1.1275	0.999547	2015-16
41026	Gawler - South	1335.22	1.13428	1	2015-16
41027	Lewiston - Two Wells	287.511	0.972139	0.286833	2015-16
41028	Craigmore - Blakeview	859.833	1.0969	0.998047	2015-16
41029	Davoren Park	503.798	0.807822	0	2015-16
41030	Elizabeth	423.628	0.825081	0	2015-16
41031	Elizabeth East	638.132	0.976566	0.25444	2015-16
41032	Munno Para West - Angle Vale	354.838	1.01854	0.666993	2015-16
41033	One Tree Hill	219.666	1.24294	0.999993	2015-16
41034	Smithfield - Elizabeth North	512.748	0.834651	0	2015-16
41035	Virginia - Waterloo Corner	255.441	0.903907	0.0181133	2015-16
41036	Enfield - Blair Athol	1046.8	1.03005	0.848933	2015-16
41037	Northgate - Oakden - Gilles Plains	1332.82	1.13844	1	2015-16
41038	Windsor Gardens	967.624	1.04819	0.947227	2015-16
41040	Ingle Farm	1041.2	1.145	1	2015-16
41041	Para Hills	895.459	1.0925	0.997827	2015-16
41042	Parafield	3	1.10372	0.90128	2015-16
41043	Parafield Gardens	961.993	1.08111	0.994107	2015-16
41044	Paralowie	740.519	0.930611	0.0162333	2015-16
41046	Salisbury	999.68	1.01432	0.688653	2015-16
41047	Salisbury East	1082.7	1.06481	0.987227	2015-16
41048	Salisbury North	675.084	0.911161	0.00405333	2015-16
41049	Golden Grove	732.715	1.22296	1	2015-16
41050	Greenwith	651.01	1.18701	1	2015-16
41051	Highbury - Dernancourt	897.165	1.2399	1	2015-16
41052	Hope Valley - Modbury	1109.54	1.18381	1	2015-16
41053	Modbury Heights	1531.55	1.23992	1	2015-16
41054	Redwood Park	1200.94	1.35427	1	2015-16
41055	St Agnes - Ridgehaven	1030.41	1.2441	1	2015-16
41056	Brighton (SA)	1340.5	1.18747	1	2015-16
41057	Glenelg (SA)	1659.79	1.27831	1	2015-16
41058	Edwardstown	786.321	1.24611	1	2015-16
41059	Hallett Cove	1016.57	1.15863	0.999993	2015-16
41060	Marino - Seaview Downs	824.182	1.17124	1	2015-16
41061	Mitchell Park	908.507	1.21926	1	2015-16
41062	Morphettville	931.384	1.19579	1	2015-16
41063	Sheidow Park - Trott Park	619.731	1.23483	1	2015-16
41064	Warradale	1037.04	1.24112	1	2015-16
41065	Belair	392.25	1.24785	1	2015-16
41066	Bellevue Heights	543.685	1.23034	1	2015-16
41067	Blackwood	1017.05	1.22331	1	2015-16
41068	Colonel Light Gardens	966.865	1.18903	1	2015-16
41069	Mitcham (SA)	1289.97	1.28326	1	2015-16
41070	Panorama	538.415	1.16505	1	2015-16
41071	Aberfoyle Park	911.98	1.08555	0.98356	2015-16
41072	Aldinga	888.686	1.04242	0.875767	2015-16
41073	Christie Downs	584.522	1.27116	1	2015-16
41074	Christies Beach	671.654	1.24776	0.999993	2015-16
41075	Clarendon	249.011	1.24317	1	2015-16
41076	Coromandel Valley	370.987	1.21459	0.999993	2015-16
41077	Flagstaff Hill	881.846	1.04066	0.839927	2015-16
41078	Hackham - Onkaparinga Hills	487.501	1.27257	1	2015-16
41079	Hackham West - Huntfield Heights	432.418	1.18696	0.96522	2015-16
41080	Happy Valley	1070.65	1.25042	1	2015-16
41082	Lonsdale	3	1.14133	0.999993	2015-16
41083	McLaren Vale	542.816	1.10274	0.997593	2015-16
41084	Morphett Vale - East	945.374	1.13741	0.999833	2015-16
41085	Morphett Vale - West	668.585	1.18464	1	2015-16
41086	Reynella	658.647	1.26157	0.999987	2015-16
41087	Seaford (SA)	1305.79	1.18967	1	2015-16
41088	Willunga	176.127	1.05067	0.86414	2015-16
41089	Woodcroft	730.774	1.163	1	2015-16
41090	Beverley	392.046	1.24951	1	2015-16
41091	Flinders Park	975.729	1.00379	0.550427	2015-16
41092	Henley Beach	1197.98	0.986037	0.380833	2015-16
41093	Hindmarsh - Brompton	951.602	1.10881	0.9999	2015-16
41094	Royal Park - Hendon - Albert Park	311.605	1.20275	1	2015-16
41095	Seaton - Grange	1093.44	1.06576	0.979887	2015-16
41096	West Lakes	1357.97	1.09989	0.99914	2015-16
41097	Woodville - Cheltenham	914.392	1.08542	0.997487	2015-16
41099	Largs Bay - Semaphore	1004.08	0.884864	0.00074	2015-16
41100	North Haven	1062.79	0.924576	0.00783333	2015-16
41101	Port Adelaide	571.872	1.06611	0.774267	2015-16
41102	The Parks	862.166	1.17361	0.998493	2015-16
41103	Torrens Island	3	1.12623	0.99948	2015-16
41105	Fulham	188.471	1.1105	0.999893	2015-16
41106	Lockleys	748.82	0.955022	0.0789467	2015-16
41107	Plympton	1299.05	1.28343	1	2015-16
41108	Richmond (SA)	796.657	1.16374	0.999907	2015-16
41109	West Beach	419.075	1.15944	0.999967	2015-16
41110	Barossa - Angaston	480.073	1.18544	0.99998	2015-16
41111	Light	586.827	1.11205	0.986733	2015-16
41112	Lyndoch	435.598	1.19217	0.999993	2015-16
41113	Mallala	173.459	1.20774	0.999993	2015-16
41114	Nuriootpa	473.44	1.20455	0.999927	2015-16
41115	Tanunda	374.209	1.20021	0.999947	2015-16
41116	Clare	334.466	1.05763	0.853907	2015-16
41117	Gilbert Valley	420.896	1.10427	0.998473	2015-16
41118	Goyder	328.837	1.13992	0.998913	2015-16
41119	Wakefield - Barunga West	781.018	1.14752	0.99986	2015-16
41120	Jamestown	403.752	1.05398	0.96102	2015-16
41121	Peterborough - Mount Remarkable	498.648	1.17879	0.99852	2015-16
41122	Port Pirie	1010.14	1.17553	0.999667	2015-16
41123	Port Pirie Region	205.324	1.27346	1	2015-16
41124	Kadina	427.58	1.21907	0.999967	2015-16
41125	Moonta	584.431	1.27247	1	2015-16
41126	Wallaroo	331.667	1.33686	1	2015-16
41127	Yorke Peninsula - North	755.428	1.02876	0.691587	2015-16
41128	Yorke Peninsula - South	481.778	1.11335	0.990293	2015-16
41129	Ceduna	205.043	1.20503	0.999707	2015-16
41130	Eyre Peninsula	431.061	1.11152	0.94206	2015-16
41131	Kimba - Cleve - Franklin Harbour	340.449	1.14274	1	2015-16
41132	Le Hunte - Elliston	167.498	1.12376	0.979507	2015-16
41133	Port Lincoln	1152.4	1.03042	0.56344	2015-16
41134	West Coast (SA)	206.558	1.0472	0.958893	2015-16
41135	Western	3	0.955646	0.29666	2015-16
41136	Whyalla	1307.95	1.05597	0.62134	2015-16
41138	APY Lands	3	1.13636	0.9816	2015-16
41139	Coober Pedy	3	0.913063	0.08128	2015-16
41140	Quorn - Lake Gilles	175.867	1.03424	0.849927	2015-16
41141	Outback	200.606	1.04285	0.84848	2015-16
41142	Port Augusta	850.977	1.34063	1	2015-16
41143	Roxby Downs	100.962	1.18212	0.999767	2015-16
41144	Goolwa - Port Elliot	1323.57	1.18008	0.999927	2015-16
41145	Kangaroo Island	435.865	1.18609	1	2015-16
41146	Strathalbyn	404.065	1.29737	1	2015-16
41147	Strathalbyn Region	777.449	1.20443	1	2015-16
41148	Victor Harbor	1622.18	1.11782	0.979847	2015-16
41149	Yankalilla	561.141	1.10229	0.978593	2015-16
41150	Grant	291.73	1.06418	0.932307	2015-16
41151	Kingston - Robe	303.497	1.10292	0.986607	2015-16
41152	Millicent	447.268	1.22699	0.99678	2015-16
41154	Naracoorte	427.683	1.08832	0.90684	2015-16
41155	Naracoorte Region	160.057	1.13858	0.999213	2015-16
41156	Penola	219.822	1.12379	0.982573	2015-16
41157	Tatiara	465.2	1.06831	0.944387	2015-16
41158	Wattle Range	209.012	1.13258	0.997427	2015-16
41159	Barmera	414.934	1.18217	0.997633	2015-16
41160	Berri	386.142	1.21441	1	2015-16
41161	Karoonda - Lameroo	225.93	1.10473	0.999907	2015-16
41162	Loxton	518.645	1.1669	0.990633	2015-16
41163	Loxton Region	130.17	1.08984	0.97852	2015-16
41164	Mannum	571.16	1.125	0.993387	2015-16
41165	Murray Bridge	1253.58	0.969635	0.262787	2015-16
41166	Murray Bridge Region	185.842	1.13687	0.999693	2015-16
41167	Renmark	399.506	1.02282	0.56848	2015-16
41168	Renmark Region	284.483	1.08062	0.994567	2015-16
41169	The Coorong	392.271	1.11591	0.920587	2015-16
41170	Waikerie	560.604	1.12877	1	2015-16
41171	Mawson Lakes - Globe Derby Park	3	1.25105	1	2015-16
41172	Pooraka - Cavan	971.884	1.23323	1	2015-16
41173	Mount Gambier - East	3	1.1524	0.989987	2015-16
41174	Mount Gambier - West	2078.85	1.26694	1	2015-16
51001	Augusta	450.03	1.21354	1	2015-16
51002	Busselton	1998.82	1.20589	1	2015-16
51003	Busselton Region	752.338	1.22368	1	2015-16
51004	Margaret River	547.568	1.17239	0.99994	2015-16
51005	Australind - Leschenault	1010.56	1.12969	0.99998	2015-16
51007	Capel	422.415	1.20655	0.999993	2015-16
51008	College Grove - Carey Park	359.577	1.0189	0.66724	2015-16
51009	Collie	605.179	1.00118	0.512753	2015-16
51010	Dardanup	217.194	1.17026	0.999293	2015-16
51011	Davenport	3	1.08281	0.798133	2015-16
51012	Eaton - Pelican Point	722.82	1.15836	0.999973	2015-16
51014	Harvey	624.924	1.11739	0.99868	2015-16
51015	East Bunbury - Glen Iris	466.102	1.03635	0.81136	2015-16
51016	Waroona	294.951	1.09799	0.967947	2015-16
51017	Bridgetown - Boyup Brook	627.956	1.1988	1	2015-16
51018	Donnybrook - Balingup	564.152	1.19265	1	2015-16
51019	Manjimup	452.637	0.959577	0.144367	2015-16
51020	Pemberton	468.634	1.18264	1	2015-16
51021	Dawesville - Bouvard	518.495	1.07325	0.984507	2015-16
51022	Falcon - Wannanup	782.833	1.14085	0.998987	2015-16
51023	Greenfields	620.7	1.1499	0.999993	2015-16
51024	Halls Head - Erskine	1525.12	1.06355	0.959127	2015-16
51025	Mandurah	897.971	1.03765	0.830913	2015-16
51026	Mandurah - East	506.78	1.1444	0.999433	2015-16
51027	Mandurah - North	974.441	1.06962	0.9676	2015-16
51028	Mandurah - South	789.302	1.07419	0.958427	2015-16
51029	Pinjarra	596.423	1.20362	1	2015-16
51030	City Beach	504.272	1.02199	0.72964	2015-16
51031	Claremont (WA)	596.662	1.0559	0.97126	2015-16
51032	Cottesloe	505.136	1.14377	0.999893	2015-16
51033	Floreat	573.746	0.990723	0.456647	2015-16
51034	Mosman Park - Peppermint Grove	679.075	1.11616	0.997647	2015-16
51035	Nedlands - Dalkeith - Crawley	1143.61	1.06265	0.973913	2015-16
51036	Swanbourne - Mount Claremont	685.24	1.054	0.90106	2015-16
51037	Kings Park (WA)	3	0.852183	0	2015-16
51038	Mount Hawthorn - Leederville	606.495	1.07905	0.994713	2015-16
51039	Mount Lawley - Inglewood	933.461	1.12683	0.99988	2015-16
51040	North Perth	443.271	1.03349	0.85114	2015-16
51041	Perth City	1153.4	1.03509	0.896287	2015-16
51042	Subiaco - Shenton Park	986.046	0.971563	0.218773	2015-16
51043	Wembley - West Leederville - Glendalough	834.029	0.979675	0.218447	2015-16
51044	Bassendean - Eden Hill - Ashfield	881.365	1.06601	0.953787	2015-16
51045	Bayswater - Embleton - Bedford	1175.2	1.10276	0.96674	2015-16
51046	Maylands	569.49	1.18476	1	2015-16
51047	Morley	1214.13	1.01684	0.6446	2015-16
51048	Noranda	620.975	1.02455	0.59998	2015-16
51049	Chidlow	221.743	1.12994	0.999993	2015-16
51050	Glen Forrest - Darlington	624.889	0.995838	0.449147	2015-16
51051	Helena Valley - Koongamia	338.278	1.01534	0.571813	2015-16
51052	Malmalling - Reservoir	3	0.999326	0.490927	2015-16
51053	Mundaring	1041	0.926874	0.00938	2015-16
51054	Swan View - Greenmount - Midvale	782.597	1.06268	0.901653	2015-16
51055	Avon Valley National Park	3	0.918521	0.0024	2015-16
51056	Ballajura	998.99	0.991639	0.439307	2015-16
51057	Beechboro	770.118	0.994598	0.457927	2015-16
51058	Bullsbrook	324.264	1.00272	0.527667	2015-16
51059	Ellenbrook	958.456	1.02307	0.59458	2015-16
51060	Gidgegannup	188.49	0.969465	0.238213	2015-16
51061	Hazelmere - Guildford	213.244	0.922823	0.0175267	2015-16
51062	Lockridge - Kiara	461.352	0.953382	0.15568	2015-16
51063	Malaga	3	1.11058	0.996173	2015-16
51065	Middle Swan - Herne Hill	331.912	1.04445	0.88478	2015-16
51066	Midland - Guildford	518.562	1.10196	0.99844	2015-16
51067	Stratton - Jane Brook	310.736	1.18674	1	2015-16
51068	The Vines	514.407	1.13411	0.999993	2015-16
51070	Craigie - Beldon	578.88	1.1382	0.999953	2015-16
51071	Currambine - Kinross	816.507	1.20711	1	2015-16
51072	Duncraig	1250.32	1.19952	1	2015-16
51073	Greenwood - Warwick	1060.76	1.08775	0.997427	2015-16
51074	Heathridge - Connolly	701.036	1.2239	1	2015-16
51075	Hillarys	967.9	1.19593	1	2015-16
51076	Iluka - Burns Beach	563.205	1.26001	1	2015-16
51077	Joondalup - Edgewater	888.68	1.13504	0.999613	2015-16
51078	Kingsley	1051.18	1.26884	1	2015-16
51079	Mullaloo - Kallaroo	894.918	1.23214	1	2015-16
51080	Ocean Reef	730.009	1.05366	0.952887	2015-16
51081	Padbury	590.144	0.908551	0.000653333	2015-16
51082	Sorrento - Marmion	997.489	1.03391	0.906247	2015-16
51083	Woodvale	780.098	1.07529	0.981553	2015-16
51084	Balcatta - Hamersley	893.302	1.1774	1	2015-16
51085	Balga - Mirrabooka	882.088	0.952451	0.09226	2015-16
51086	Dianella	1460.03	1.05808	0.796307	2015-16
51088	Innaloo - Doubleview	705.863	1.09909	0.99702	2015-16
51089	Karrinyup - Gwelup - Carine	1572.5	1.02891	0.811727	2015-16
51090	Nollamara - Westminster	553.972	1.25035	1	2015-16
51091	Osborne Park Industrial	3	0.985415	0.35704	2015-16
51092	Scarborough	733.711	1.17963	1	2015-16
51093	Stirling - Osborne Park	787.922	1.02048	0.741873	2015-16
51094	Trigg - North Beach - Watermans Bay	629.167	0.993137	0.423407	2015-16
51095	Tuart Hill - Joondanna	495.501	0.9322	0.0181067	2015-16
51096	Wembley Downs - Churchlands - Woodlands	1037.78	0.999134	0.491107	2015-16
51097	Yokine - Coolbinia - Menora	836.886	0.994313	0.440113	2015-16
51098	Alexander Heights - Koondoola	672.241	0.877515	0.00117333	2015-16
51099	Butler - Merriwa - Ridgewood	712.354	1.05207	0.957673	2015-16
51100	Carramar	503.477	0.99078	0.4028	2015-16
51101	Clarkson	527.797	1.09607	0.999393	2015-16
51102	Girrawheen	372.854	0.973299	0.386987	2015-16
51103	Madeley - Darch - Landsdale	1062.16	1.0503	0.910733	2015-16
51104	Marangaroo	594.231	1.058	0.986067	2015-16
51105	Mindarie - Quinns Rocks - Jindalee	1099.48	0.881342	7.33333e-05	2015-16
51106	Neerabup National Park	3	1.05045	0.781487	2015-16
51107	Tapping - Ashby - Sinagra	564.841	0.9424	0.12052	2015-16
51108	Wanneroo	1407.84	1.07346	0.96316	2015-16
51110	Armadale - Wungong - Brookdale	778.752	0.970482	0.18724	2015-16
51111	Ashendon - Lesley	3	0.942806	0.0383	2015-16
51112	Camillo - Champion Lakes	272.546	1.00196	0.50884	2015-16
51113	Forrestdale - Harrisdale - Piara Waters	460.602	1.00855	0.54768	2015-16
51114	Kelmscott	629.716	0.941278	0.0161533	2015-16
51115	Mount Nasura - Mount Richon - Bedfordale	606.491	1.01453	0.657593	2015-16
51116	Roleystone	570.956	0.956389	0.0895667	2015-16
51117	Seville Grove	338.156	1.08033	0.98422	2015-16
51118	Belmont - Ascot - Redcliffe	711.08	0.91059	0.00811333	2015-16
51119	East Victoria Park - Carlisle	714.637	1.04803	0.926967	2015-16
51120	Kewdale Commercial	3	1.16476	1	2015-16
51121	Perth Airport	3	1.03024	0.6507	2015-16
51122	Rivervale - Kewdale - Cloverdale	1041.56	1.13262	0.999993	2015-16
51123	Victoria Park - Lathlain - Burswood	624.743	0.911749	0.00174667	2015-16
51124	Bentley - Wilson - St James	762.831	1.1165	0.99996	2015-16
51125	Canning Vale - West	688.512	0.915231	0.00237333	2015-16
51127	Cannington - Queens Park	556.003	1.02213	0.74496	2015-16
51128	Parkwood - Ferndale - Lynwood	844.131	0.946972	0.0543333	2015-16
51129	Riverton - Shelley - Rossmoyne	961.59	1.04194	0.945793	2015-16
51130	Welshpool	3	1.01153	0.650213	2015-16
51131	Willetton	1273.78	0.976252	0.2588	2015-16
51132	Beckenham - Kenwick - Langford	885.453	1.15429	1	2015-16
51133	Canning Vale - East	1074.67	1.09402	0.996673	2015-16
51134	Gosnells	894.886	1.05343	0.89822	2015-16
51135	Huntingdale - Southern River	802.226	1.00505	0.543753	2015-16
51136	Maddington - Orange Grove - Martin	688.019	1.09952	0.98216	2015-16
51137	Thornlie	1411.14	1.05566	0.935187	2015-16
51138	Forrestfield - Wattle Grove	956.304	1.10582	0.999307	2015-16
51139	High Wycombe	606.348	1.05212	0.95992	2015-16
51140	Kalamunda - Maida Vale - Gooseberry Hill	1279.3	1.07931	0.982467	2015-16
51141	Lesmurdie - Bickley - Carmel	808.941	1.00247	0.515827	2015-16
51142	Byford	477.983	1.08236	0.97776	2015-16
51143	Mundijong	356.889	0.993651	0.43292	2015-16
51144	Serpentine - Jarrahdale	307.728	0.897015	0.00191333	2015-16
51145	Como	626.842	1.05604	0.688667	2015-16
51146	Manning - Waterford	812.466	1.15537	0.956647	2015-16
51147	South Perth - Kensington	1111.61	0.989237	0.386247	2015-16
51148	Banjup	624.847	0.994571	0.43884	2015-16
51150	Bibra Industrial	3	1.02567	0.732267	2015-16
51152	Coogee	573.17	0.995748	0.462167	2015-16
51153	Coolbellup	451.062	1.15596	0.99988	2015-16
51154	Hamilton Hill	517.631	1.03201	0.85622	2015-16
51155	Henderson	3	1.06051	0.973593	2015-16
51158	North Coogee	95.9671	0.98424	0.43324	2015-16
51159	South Lake - Cockburn Central	614.212	0.957525	0.163373	2015-16
51160	Spearwood	589.804	0.852525	0.00028	2015-16
51161	Success - Hammond Park	442.917	0.973413	0.374927	2015-16
51163	Yangebup	330.247	0.918476	0.160047	2015-16
51164	East Fremantle	545.553	1.22293	0.999907	2015-16
51165	Fremantle	1032.82	1.15141	1	2015-16
51166	Fremantle - South	998.865	1.14924	1	2015-16
51167	O'Connor (WA)	3	1.12312	0.998987	2015-16
51169	Bertram - Wellard (West)	296.942	1.27697	1	2015-16
51170	Calista	289.222	1.18652	1	2015-16
51172	Hope Valley - Postans	3	1.16162	1	2015-16
51173	Kwinana Industrial	3	1.00398	0.5292	2015-16
51174	Parmelia - Orelia	445.645	1.2282	1	2015-16
51175	Applecross - Ardross	905.023	0.954674	0.117567	2015-16
51176	Bateman	299.384	1.00107	0.511033	2015-16
51177	Bicton - Palmyra	872.951	1.05418	0.968313	2015-16
51178	Booragoon	1039.29	1.04699	0.72418	2015-16
51179	Bull Creek	588.191	1.11677	0.999787	2015-16
51180	Leeming	954.024	1.07721	0.98698	2015-16
51181	Melville	1085.3	1.04903	0.921647	2015-16
51182	Murdoch - Kardinya	899.142	1.02501	0.764847	2015-16
51183	Willagee	218.674	1.23359	1	2015-16
51184	Winthrop	589.847	1.22035	0.99996	2015-16
51185	Baldivis	1069.54	1.19249	1	2015-16
51186	Cooloongup	586.143	1.2234	1	2015-16
51187	Port Kennedy	620.463	1.04394	0.764353	2015-16
51188	Rockingham	1109.4	1.02167	0.669873	2015-16
51189	Rockingham Lakes	3	1.12312	0.995347	2015-16
51190	Safety Bay - Shoalwater	877.299	1.27462	1	2015-16
51191	Singleton - Golden Bay - Secret Harbour	753.008	1.13166	0.9993	2015-16
51192	Waikiki	754.805	1.12019	0.994113	2015-16
51193	Warnbro	620.275	1.10808	0.983353	2015-16
51225	Albany	1417.87	1.03031	0.71	2015-16
51226	Albany Region	269.369	0.953773	0.169227	2015-16
51227	Bayonet Head - Lower King	373.566	1.12571	0.999473	2015-16
51228	Denmark	611.376	1.07084	0.916827	2015-16
51229	Gnowangerup	173.494	1.02447	0.690993	2015-16
51230	Katanning	286.641	1.02433	0.663247	2015-16
51231	Kojonup	328.989	0.923773	0.0126667	2015-16
51232	Little Grove - Elleker	303.161	1.06941	0.925173	2015-16
51233	McKail - Willyung	611.003	1.10402	0.989793	2015-16
51234	Plantagenet	397.516	1.07654	0.93054	2015-16
51236	Chittering	361.389	1.08696	0.961753	2015-16
51237	Cunderdin	263.14	1.07152	0.888433	2015-16
51238	Dowerin	241.802	1.02465	0.691907	2015-16
51239	Gingin - Dandaragan	729.702	1.11531	0.992547	2015-16
51240	Merredin	332.183	1.17577	1	2015-16
51241	Moora	304.67	0.991672	0.45548	2015-16
51242	Mukinbudin	194.768	0.948684	0.225113	2015-16
51243	Northam	612.117	1.09191	0.999587	2015-16
51244	Toodyay	386.212	1.01763	0.594887	2015-16
51245	York - Beverley	455.87	1.00554	0.527953	2015-16
51246	Brookton	300.253	1.00363	0.52166	2015-16
51247	Kulin	304.085	1.00111	0.513673	2015-16
51248	Murray	161.456	0.98522	0.370147	2015-16
51249	Narrogin	302.487	1.08052	0.879627	2015-16
51250	Wagin	385.788	1.04771	0.8296	2015-16
51251	Dalyellup	654.666	1.22483	1	2015-16
51252	Gelorup - Stratham	3	1.23677	1	2015-16
51253	South Bunbury - Bunbury	3	1.13481	0.998033	2015-16
51254	Withers - Usher	1332	1.21006	1	2015-16
51255	Alkimos - Eglinton	3	0.967297	0.179413	2015-16
51256	Carabooda - Pinjar	3	1.10127	0.997047	2015-16
51257	Two Rocks	3	1.12078	0.9978	2015-16
51258	Yanchep	694.809	0.90829	0.0226733	2015-16
51259	Beeliar - Wattleup	312.135	0.832152	0	2015-16
51260	Jandakot	209.707	1.07963	0.992847	2015-16
51261	Casuarina - Wandi	208.594	1.09297	0.999067	2015-16
51262	Broome	397.534	0.651804	0	2015-16
51263	Derby - West Kimberley	126.326	0.546596	0	2015-16
51264	Halls Creek	46.0799	0.528339	0	2015-16
51265	Kununurra	179.537	0.615766	0	2015-16
51266	Roebuck	3	0.61111	6.66667e-06	2015-16
51267	East Pilbara	34.4084	0.650147	0	2015-16
51268	Newman	70.4663	0.741706	0.00125333	2015-16
51269	Port Hedland	81.8259	0.614205	0	2015-16
51270	South Hedland	137.049	0.510438	0	2015-16
51271	Ashburton (WA)	130.703	0.771608	1.33333e-05	2015-16
51272	Karratha	295.894	0.81819	8.66667e-05	2015-16
51273	Roebourne	80.3242	0.639706	0	2015-16
51274	Esperance	896.331	1.17056	1	2015-16
51275	Esperance Region	198.061	1.08274	0.9171	2015-16
51276	Carnarvon	202.887	0.746539	0	2015-16
51277	Exmouth	155.567	0.91017	0.0631733	2015-16
51278	Boulder	269.633	0.736781	0	2015-16
51279	Kalgoorlie	524.627	0.786769	0	2015-16
51280	Kalgoorlie - North	276.716	0.834481	0.000393333	2015-16
51281	Kalgoorlie Airport	3	0.77782	0.0107733	2015-16
51282	Kambalda - Coolgardie - Norseman	191.353	0.847111	0.000273333	2015-16
51283	Leinster - Leonora	79.5019	0.809341	0.000193333	2015-16
51285	Geraldton	918.856	0.982229	0.28564	2015-16
51286	Geraldton - East	384.587	0.936345	0.07006	2015-16
51287	Geraldton - North	376.559	1.03281	0.75522	2015-16
51288	Geraldton - South	492.813	1.10359	0.99034	2015-16
51289	Irwin	348.928	1.23496	0.999987	2015-16
51290	Meekatharra	105.687	0.799651	2.66667e-05	2015-16
51291	Morawa	279.428	1.05566	0.86196	2015-16
51292	Northampton - Mullewa - Greenough	664.593	1.00194	0.522247	2015-16
61001	Bridgewater - Gagebrook	318.133	0.86797	0.00109333	2015-16
61002	Brighton - Pontville	295.332	1.09421	0.964093	2015-16
61003	Old Beach - Otago	301.643	1.20381	0.999907	2015-16
61004	Bellerive - Rosny	546.085	1.21065	1	2015-16
61005	Cambridge	613.362	1.23335	1	2015-16
61006	Geilston Bay - Risdon	253.833	1.2755	0.999967	2015-16
61007	Howrah - Tranmere	866.762	1.23685	1	2015-16
61008	Lindisfarne - Rose Bay	577.127	1.22775	1	2015-16
61009	Mornington - Warrane	246.433	0.972619	0.300767	2015-16
61010	Risdon Vale	115.582	1.01803	0.61008	2015-16
61011	Rokeby	267.769	0.933748	0.107173	2015-16
61012	South Arm	327.736	1.18051	0.99886	2015-16
61013	Austins Ferry - Granton	255.277	1.09358	0.94004	2015-16
61014	Berriedale - Chigwell	293.921	1.00661	0.552387	2015-16
61015	Claremont (Tas.)	422.187	0.96648	0.222053	2015-16
61016	Derwent Park - Lutana	226.241	0.918083	0.0654333	2015-16
61017	Glenorchy	604.681	0.925221	0.0166	2015-16
61018	Montrose - Rosetta	336.95	1.08474	0.943893	2015-16
61019	Moonah	298.262	0.966883	0.241167	2015-16
61020	New Norfolk	431.887	0.993778	0.44106	2015-16
61021	West Moonah	190.571	0.982596	0.386393	2015-16
61022	Kingston - Huntingfield	798.467	1.21934	1	2015-16
61023	Kingston Beach - Blackmans Bay	878.294	1.29203	1	2015-16
61024	Margate - Snug	547.746	1.2256	1	2015-16
61026	Taroona - Bonnet Hill	332.429	1.31921	1	2015-16
61027	Hobart	483.092	1.08321	0.97812	2015-16
61028	Lenah Valley - Mount Stuart	545.024	1.09227	0.990653	2015-16
61029	Mount Nelson - Dynnyrne	322.394	1.27324	1	2015-16
61030	New Town	366.592	1.12247	0.993613	2015-16
61031	Sandy Bay	844.436	1.24548	1	2015-16
61032	South Hobart - Fern Tree	423.716	1.16732	0.999807	2015-16
61033	West Hobart	430.238	1.14278	0.998607	2015-16
61034	Dodges Ferry - Lewisham	512.93	1.08071	0.969273	2015-16
61035	Sorell - Richmond	619.515	1.08621	0.98998	2015-16
61036	Invermay	125.824	0.812241	0.00408	2015-16
61037	Kings Meadows - Punchbowl	265.569	1.07257	0.91764	2015-16
61038	Launceston	327.028	1.09183	0.959167	2015-16
61039	Legana	298.007	1.24067	0.999947	2015-16
[truncated: 248 more rows]
